# Supplementary material for: 2,9-Diaryl-6,13-bis(triisopropylsilylethynyl)pentacene derivatives: synthesis and application in cancer sonodynamic therapy
Source: Royal Society of Chemistry journal article supplement (doi:10.1039/d5cc00326a), 2025-01-01
Supplement: d5cc00326a1.pdf [file d5cc00326a1.pdf]

Supporting information

**2,9-Diaryl-6,13-bis(triisopropylsilylethynyl)pentacene derivatives:  
synthesis and application in cancer sonodynamic therapy**

Nan Han,<sup>a</sup> Chunyuan Hou,<sup>a</sup> Zhuofei Duan,<sup>a</sup> Jun Gu,<sup>a</sup> Yu Zhang<sup>\*a</sup> and Jun Luo <sup>\*a</sup>

School of Chemistry and Chemical Engineering, Nanjing University of Science and  
Technology, Nanjing 210094, China.

E-mail: y\_zhang@njust.edu.cn; luojun@njust.edu.cn

**contents:**

|                                                          |    |
|----------------------------------------------------------|----|
| 1. Materials and Instruments .....                       | 1  |
| 2. Experimental section .....                            | 2  |
| 2.1 Synthesis .....                                      | 2  |
| 2.2 Evaluation tests .....                               | 14 |
| 2.3 Statistical analysis .....                           | 17 |
| 3. DFT Calculations .....                                | 17 |
| 4. Identification and Testing Spectra of Compounds ..... | 31 |
| 5. References.....                                       | 68 |



# 1. Materials and Instruments

Phthalic anhydride, 4-bromo phthalic anhydride, tetrakis(triphenylphosphine) palladium, stannous chloride, (triisopropylsilyl)acetylene, phenylboronic acid pinacol ester, 4-methylphenylboronic acid pinacol ester, 3,4,5-trifluorophenylboronic acid pinacol ester, 2-naphthaleneboronic acid pinacol ester, tetramethylbenzidine(TMB) and 2,2,6,6-tetramethyl-4-piperidone hydrochloride were purchased from Bide Pharmatech Co., Ltd. Lithium aluminum hydride, potassium hydroxide and potassium carbonate were purchased from Shanghai Aladdin Biochemical Technology Co., Ltd. Zinc chloride, oxalyl chloride, PBS, SOSG, 1,4-cyclohexanedione and diphenylisobenzofuran (DPBF) were purchased from Shanghai Macklin Biochemical Technology Co., Ltd. Triethylamine and isopropyl magnesium bromide were purchased from Shanghai Titan Scientific Co., Ltd. Superoxide anion radical detection kit were purchased from Shanghai Yuanye Bio-Technology Co., Ltd. Methyl thiazolyl tetrazolium(MTT), Hoechst33342 and 2'-7'-dichlorofluorescein diacetate (DCFH-DA) were purchased from Beyotime Institute of Biotechnology Co. LLC. All starting chemicals and solvents were purchased from commercial suppliers without further purification. 4T1, NCTC 1469 and L02 cell lines were obtained from Cell Bank of Chinese Academy of Sciences and cultured in RPMI 1640 medium supplemented with 10% FBS (Gibco) and penicillin/streptomycin (1%, w/v). Female BALB/c mice and Sprague Dawley rats were purchased from Nanjing Qinglongshan Experimental Animal Center. Mice used in experiments were 6-8 weeks old and SD rats used in experiments were 3-4 weeks. All animal experiments were performed in accordance with the National Institute of Health Guidelines under the protocols approved by the Animal Ethical and Welfare Committee of Nanjing University of Science and Technology (Approval No: AUCU-NUST2023012).

<sup>1</sup>H-NMR and <sup>13</sup>C-NMR spectra were recorded on a Bruker Avance-III DRX spectrometer operating at 500 MHz and 126 MHz respectively. High resolutions mass spectrometry (HRMS) data were obtained by a Thermo-Fisher Scientific high-performance liquid chromatography-high resolution mass spectrometry (HPLC/HRMS) system. The FTIR were measured by a Thermo-Fisher NICOLETIS20 Fourier transform infrared spectroscopy. The UV-Vis spectra were measured by a Thermo-Fisher Evolution 220 UV-Vis spectrophotometer. The ESR spectra were measured by a Bruker EMXplus-9 electron paramagnetic resonance (EPR) spectrometer. The fluorescence spectra were scanned with an excitation wavelength of 500 nm using a Hamamatsu Quantaaurus-Tau fluorescence lifetime spectrometer. MTT assays were performed on a microplate reader (Tecan Group). Fluorescent images were taken by an inverted fluorescence microscope (Nikon Instruments, Japan).





### Synthesis of 1,2-benzenedimethanol (**S4**)

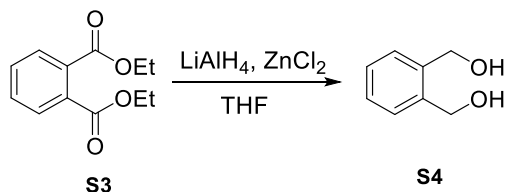

Lithium aluminum hydride (1.8 g, 47.4 mmol) and zinc chloride (1.8 g, 13.2 mmol) were dispersed in 100 mL dry tetrahydrofuran, then solution of diethyl phthalate (**S3**, 3 g, 13.5 mmol) in 80 mL of tetrahydrofuran was added dropwise at 0°C. The reaction mixture returned to room temperature and stirred for 24 h. Subsequently, the reaction mixture was quenched with water at 0°C and filtered with celite. Filter residue was washed with ethanol and methanol and filtrate was concentrated under reduced pressure to afford the crude product. The crude product was purified in silica gel column chromatography using PE : EA = 2 : 1 as eluent to obtain the white solid (1.66 g, 89% yield). <sup>1</sup>H NMR (500 MHz, DMSO-*d*<sub>6</sub>) δ = 7.41 (dd, *J* = 5.5, 3.5 Hz, 2H), 7.25 (dd, *J* = 5.6, 3.4 Hz, 2H), 5.14 (t, *J* = 5.5 Hz, 2H), 4.58 (d, *J* = 5.6 Hz, 4H). <sup>13</sup>C NMR (126 MHz, DMSO-*d*<sub>6</sub>) δ = 139.84, 127.28, 127.09, 60.95.

### Synthesis of *o*-phthalaldehyde (**S5**)

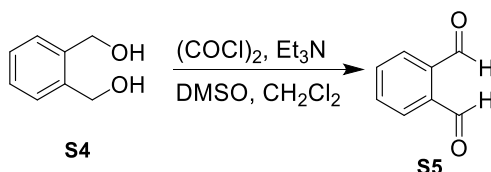

To a stirred solution of oxalyl chloride (5 mL, 59.1 mmol) in dichloromethane (60 mL) at -78°C was added dimethyl sulfoxide (5 mL, 70.9 mmol) in dichloromethane (10 mL). After 2 h, a solution of 1,2-benzenedimethanol (**S4**, 1.63 g, 11.8 mmol) in dichloromethane (60 mL) and dimethyl sulfoxide (3 mL) was added over 30 min to the reaction mixture. After 2 h, triethylamine (24.6 mL, 177.3 mmol) was added over 20 min. After 1 h at -78°C, the reaction mixture was allowed to warm to room temperature then washed with water. The reaction mixture was concentrated under reduced pressure to afford the crude product. The crude product was purified in silica gel column chromatography using PE : EA = 20 : 1 as eluent to obtain the light yellow solid (1.3 g, 80% yield). <sup>1</sup>H NMR (500 MHz, chloroform-*d*) δ 10.53 (s, 2H), 8.00 - 7.96 (m, 2H), 7.80 (dd, *J* = 5.7, 3.3 Hz, 2H). <sup>13</sup>C NMR (126 MHz, chloroform-*d*) δ = 192.43, 136.41, 133.81, 131.14.

### Synthesis of pentacene-6,13-dione (**S6**)

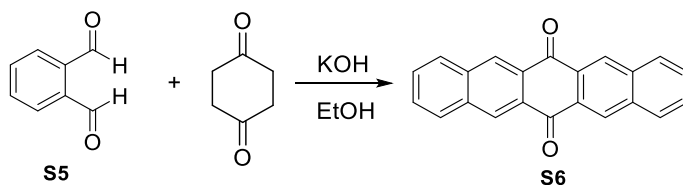

Aqueous KOH (15%, 1.2 g, 30 mmol) was slowly added to a solution of *o*-phthalaldehyde (**S5**)

(2 g, 14.9 mmol) and 1,4-cyclohexanedione (0.84 g, 7.45 mmol) in ethanol (90 mL) under a N<sub>2</sub> atmosphere. The solution turned from yellow to golden brown to dark brown before a yellow solid corresponding to pentacene-6,13-dione precipitated. After stirring the reaction mixture for 3 h, the crude reaction mixture was filtered and washed with ethanol, water, and methanol until the washings were colorless. The solid residue was dried under reduced pressure to obtain 1.74 g (76% yield) of bright yellow pentacene-6,13-dione. The product was used for next reaction without further purification because of poor solubility.

### Synthesis of 6,13-Bis(triisopropylsilylethynyl)pentacene (S1)

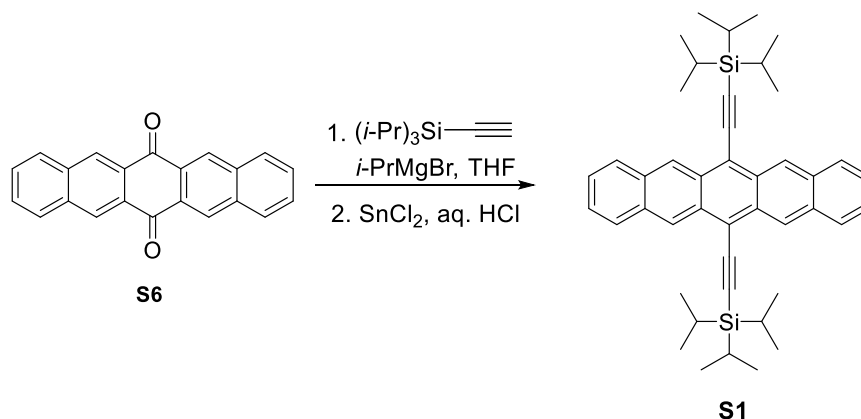

6,13-Bis(triisopropylsilylethynyl)pentacene (S1) were synthesized based on reference with slight modifications as described below.<sup>[1]</sup>

Triisopropylsilylacetylene (1.4 mL, 6.24 mmol) was dissolved in 20 mL tetrahydrofuran under nitrogen atmosphere, then 2.6 mL of a 2.8 M solution of isopropyl magnesium bromide in tetrahydrofuran was added slowly. The reaction mixture was stirred for 4 h at 38°C, pentacene-6,13-dione (S6, 0.2 g, 0.65 mmol) was added to the solution when the solution was allowed to cool. The reaction was stirred overnight at 38°C again. The reaction was combined with 1 mL of a stannous chloride (0.32 g, 1.7 mmol) solution in 10% HCl and was stirred for 5 min in the dark. The reaction mixture concentrated under reduced pressure then was purified in silica gel column chromatography using petroleum ether as eluent to obtain the dark blue solid (0.16 g, 38.5% yield). <sup>1</sup>H NMR (500 MHz, chloroform-*d*) δ = 9.30 (s, 4H), 7.97 (dd, *J* = 6.6, 3.3 Hz, 4H), 7.41 - 7.24 (m, 4H), 1.37 (s, 42H). <sup>13</sup>C NMR (126 MHz, chloroform-*d*) δ = 132.33, 130.68, 128.73, 126.36, 126.07, 118.41, 107.22, 104.76, 19.05, 11.74.

### Synthesis of diethyl 4-bromophthalate (3)

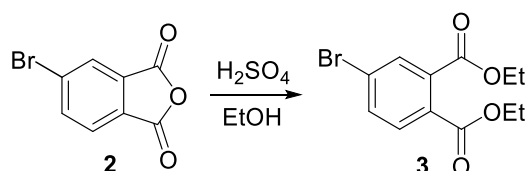

4-Bromophthalic anhydride (2, 10 g, 44.3 mmol) and sulfuric acid 0.8 mL were dissolved in 55 mL ethanol under nitrogen atmosphere. The reaction mixture was refluxed for 24 h and then concentrated under reduced pressure to afford the crude product. The crude product was purified

in silica gel column chromatography using PE : EA = 100 : 1 as eluent to obtain the colorless oily liquid (12.76 g, 96% yield).  $^1\text{H}$  NMR (500 MHz, chloroform-*d*)  $\delta$  = 7.83 (d,  $J$  = 1.9 Hz, 1H), 7.66 - 7.61 (m, 2H), 4.36 (q,  $J$  = 7.2 Hz, 4H), 1.39 - 1.35 (m, 6H).  $^{13}\text{C}$  NMR (126 MHz, chloroform-*d*)  $\delta$  = 166.59, 166.36, 134.32, 133.86, 131.75, 130.64, 130.57, 125.57, 62.03, 61.85, 14.08.

### Synthesis of diethyl 4-phenylphthalate (4a)

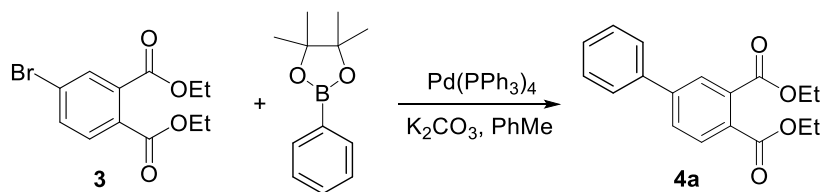

Diethyl 4-bromophthalate (**3**, 3.6 g, 12 mmol), potassium carbonate (5.1 g, 36.9 mmol), 2-naphthaleneboronic acid pinacol ester (3.7 g, 18 mmol) and tetrakis(triphenylphosphine) palladium (1.3 g) were dispersed in 50 mL 1,4-dioxane, then the reaction mixture was refluxed for 24 h. Subsequently, the reaction mixture returned to room temperature and was filtered with celite. Filter cake was washed with dichloromethane and filtrate was concentrated under reduced pressure to afford the crude product. The crude product was purified in silica gel column chromatography using PE : EA = 80 : 1 as eluent to obtain the colorless oily liquid (3.2 g, 90% yield).  $^1\text{H}$  NMR (500 MHz, chloroform-*d*)  $\delta$  = 7.90 (d,  $J$  = 1.9 Hz, 1H), 7.83 (d,  $J$  = 8.0 Hz, 1H), 7.71 (dd,  $J$  = 8.0, 1.9 Hz, 1H), 7.60 - 7.59 (m, 2H), 7.46 - 7.43 (m, 2H), 7.40 - 7.37 (m, 1H), 4.42 - 4.36 (m, 4H), 1.40 - 1.36 (m, 6H).  $^{13}\text{C}$  NMR (126 MHz, chloroform-*d*)  $\delta$  = 167.97, 167.26, 144.24, 139.15, 133.45, 130.29, 129.75, 129.21, 129.06, 128.45, 127.38, 127.28, 61.79, 61.65, 14.20, 14.18.

### Synthesis of diethyl 4'-methyl-[1,1'-biphenyl]-3,4-dicarboxylate (4b)

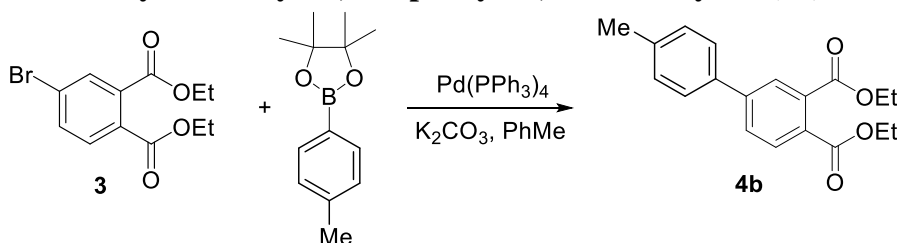

Diethyl 4-bromophthalate (**3**, 2.4 g, 8 mmol), potassium carbonate (3.4 g, 24.6 mmol), 4-methylphenylboronic acid pinacol ester (2.6 g, 12 mmol) and tetrakis(triphenylphosphine) palladium (0.86 g) were dispersed in 30 mL 1,4-dioxane, then the reaction mixture was refluxed for 24 h. Subsequently, the reaction mixture returned to room temperature and was filtered with celite. Filter cake was washed with dichloromethane and filtrate was concentrated under reduced pressure to afford the crude product. The crude product was purified in silica gel column chromatography using PE : EA = 80 : 1 as eluent to obtain the colorless oily liquid (2.35 g, 94% yield).  $^1\text{H}$  NMR (500 MHz, chloroform-*d*)  $\delta$  = 7.87 (d,  $J$  = 1.9 Hz, 1H), 7.82 (d,  $J$  = 8.0 Hz, 1H), 7.69 (dd,  $J$  = 8.1, 1.9 Hz, 1H), 7.49 (d,  $J$  = 7.8 Hz, 2H), 7.25 (d,  $J$  = 7.7 Hz, 2H), 4.42 - 4.35 (m, 4H), 2.38 (s, 3H), 1.39 - 1.36 (m, 6H).  $^{13}\text{C}$  NMR (126 MHz, chloroform-*d*)  $\delta$  = 168.11, 167.26, 144.20, 138.45, 136.22, 133.52, 129.87, 129.79, 129.76, 128.90, 127.09, 127.07, 61.77, 61.61, 21.19, 14.20, 14.18.

### Synthesis of diethyl 3',4',5'-trifluoro-[1,1'-biphenyl]-3,4-dicarboxylate (4c)

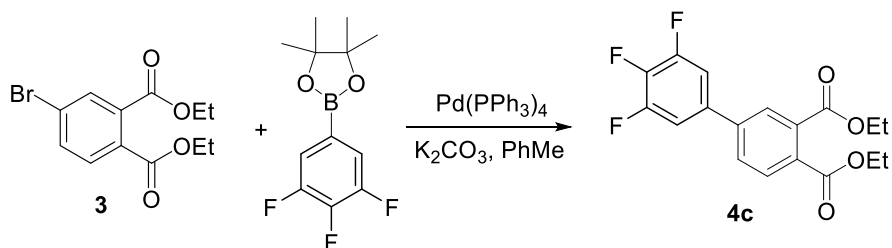

Diethyl 4-bromophthalate (**3**, 3 g, 10 mmol), potassium carbonate (4.2 g, 30.7 mmol), 3,4,5-trifluorophenylboronic acid pinacol ester (3.9 g, 15 mmol) and tetrakis(triphenylphosphine) palladium (1.1 g) were dispersed in 45 mL 1,4-dioxane, then the reaction mixture was refluxed for 24 h. Subsequently, the reaction mixture returned to room temperature and was filtered with celite. Filter cake was washed with dichloromethane and filtrate was concentrated under reduced pressure to afford the crude product. The crude product was purified in silica gel column chromatography using PE : EA = 80 : 1 as eluent to obtain the colorless oily liquid (3.2 g, 92% yield).  $^1\text{H}$  NMR (500 MHz, chloroform-*d*)  $\delta$  = 7.84 - 7.81 (m, 2H), 7.65 (dd,  $J$  = 8.1, 2.0 Hz, 1H), 7.27 - 7.20 (m, 2H), 4.40 (p,  $J$  = 7.2 Hz, 4H), 1.39 (td,  $J$  = 7.1, 3.5 Hz, 6H).  $^{13}\text{C}$  NMR (126 MHz, chloroform-*d*)  $\delta$  = 167.35, 166.92, 152.63, 150.59, 140.93, 135.26, 133.56, 131.61, 129.95, 128.99, 127.19, 111.52, 62.00, 61.85, 14.12.

#### Synthesis of diethyl 4-(naphthalen-2-yl)phthalate (**4d**)

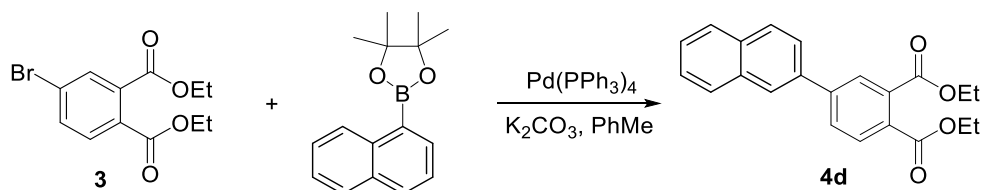

Diethyl 4-bromophthalate (**3**, 2.4 g, 8 mmol), potassium carbonate (3.4 g, 24.6 mmol), 2-naphthaleneboronic acid pinacol ester (3.1 g, 12 mmol) and tetrakis(triphenylphosphine) palladium (0.86 g) were dispersed in 30 mL 1,4-dioxane, then the reaction mixture was refluxed for 24 h. Subsequently, the reaction mixture returned to room temperature and was filtered with celite. Filter cake was washed with dichloromethane and filtrate was concentrated under reduced pressure to afford the crude product. The crude product was purified in silica gel column chromatography using PE : EA = 80 : 1 as eluent to obtain the white solid (2.6 g, 93% yield).  $^1\text{H}$  NMR (500 MHz, chloroform-*d*)  $\delta$  = 8.04 (d,  $J$  = 19.1 Hz, 2H), 7.92 - 7.82 (m, 5H), 7.71 (dd,  $J$  = 8.4, 1.8 Hz, 1H), 7.53 - 7.48 (m, 2H), 4.44 - 4.38 (m, 4H), 1.41 - 1.38 (m, 6H).  $^{13}\text{C}$  NMR (126 MHz, chloroform-*d*)  $\delta$  = 168.10, 167.28, 144.17, 136.40, 133.59, 133.56, 133.11, 130.24, 129.86, 129.42, 128.88, 128.42, 127.75, 127.58, 126.69, 126.66, 126.47, 125.05, 61.88, 61.71, 14.23, 14.22.

#### Synthesis of 4-phenyl-1,2-benzenedimethanol (**5a**)

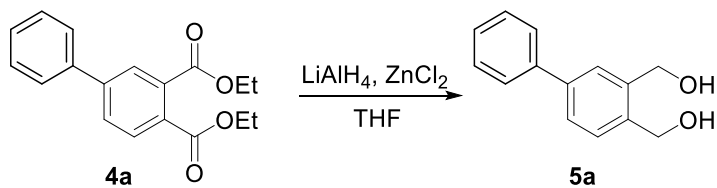

Lithium aluminum hydride (1.35 g, 35.5 mmol) and zinc chloride (1.35 g, 9.9 mmol) were dispersed in 80 mL tetrahydrofuran, then 60 mL tetrahydrofuran dissolved with diethyl 4-phenylphthalate (**4a**, 3 g, 10.1 mmol) was added dropwise at 0°C. The reaction mixture returned to room temperature and stirred for 24 h. Subsequently, the reaction mixture was quenched with water at 0°C and filtered with celite. Filter residue was washed with ethanol and methanol and filtrate was concentrated under reduced pressure to afford the crude product. The crude product was purified in silica gel column chromatography using PE : EA = 2 : 1 as eluent to obtain the white solid (1.9 g, 87% yield). <sup>1</sup>H NMR (500 MHz, DMSO-*d*<sub>6</sub>) δ = 7.66 - 7.60 (m, 3H), 7.50 - 7.40 (m, 4H), 7.31 (t, *J* = 7.1 Hz, 1H), 5.14 (dt, *J* = 19.1, 5.5 Hz, 2H), 4.57 (dd, *J* = 16.4, 5.5 Hz, 4H). <sup>13</sup>C NMR (126 MHz, DMSO-*d*<sub>6</sub>) δ = 140.81, 140.45, 139.13, 138.92, 129.39, 127.95, 127.68, 126.97, 125.53, 125.20, 60.93, 60.66.

### Synthesis of (4'-methyl-[1,1'-biphenyl]-3,4-diyl)dimethanol (**5b**)

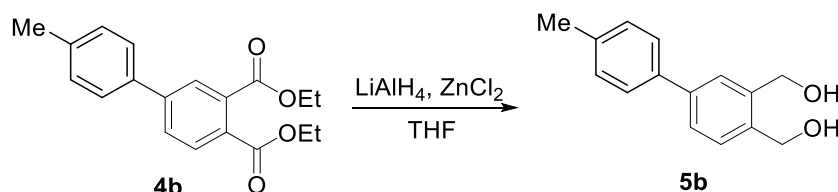

Lithium aluminum hydride (1.5 g, 39.3 mmol) and zinc chloride (1.5 g, 11 mmol) were dispersed in 80 mL tetrahydrofuran, then 60 mL tetrahydrofuran dissolved with diethyl 4'-methyl-[1,1'-biphenyl]-3,4-dicarboxylate (**4b**, 3.5 g, 11.2 mmol) was added dropwise at 0°C. The reaction mixture returned to room temperature and stirred for 24 h. Subsequently, the reaction mixture was quenched with water at 0°C and filtered with celite. Filter residue was washed with ethanol and methanol and filtrate was concentrated under reduced pressure to afford the crude product. The crude product was purified in silica gel column chromatography using PE : EA = 2 : 1 as eluent to obtain the white solid (2.2 g, 86% yield). <sup>1</sup>H NMR (500 MHz, DMSO-*d*<sub>6</sub>) δ = 7.67 (d, *J* = 2.0 Hz, 1H), 7.55 (d, *J* = 8.1 Hz, 2H), 7.50 (dd, *J* = 7.8, 2.0 Hz, 1H), 7.45 (d, *J* = 7.8 Hz, 1H), 7.26 (d, *J* = 7.8 Hz, 2H), 5.14 (dt, *J* = 19.9, 5.5 Hz, 2H), 4.60 (dd, *J* = 16.6, 5.5 Hz, 4H), 2.34 (s, 3H). <sup>13</sup>C NMR (126 MHz, DMSO-*d*<sub>6</sub>) δ = 140.40, 138.82, 138.79, 137.89, 136.91, 129.98, 127.92, 126.77, 125.26, 124.89, 60.94, 60.66, 21.13.

### Synthesis of (3',4',5'-trifluoro-[1,1'-biphenyl]-3,4-diyl)dimethanol (**5c**)

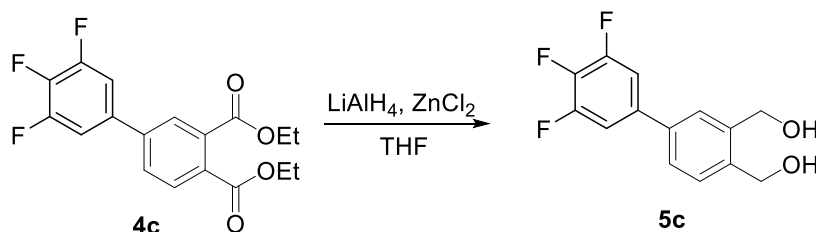

Lithium aluminum hydride (1.6 g, 41.8 mmol) and zinc chloride (1.6 g, 11.6 mmol) were dispersed in 90 mL tetrahydrofuran, then 70 mL tetrahydrofuran dissolved with diethyl 3',4',5'-trifluoro-[1,1'-biphenyl]-3,4-dicarboxylate (**4c**, 4.2 g, 11.9 mmol) was added dropwise at 0°C. The reaction mixture returned to room temperature and stirred for 24 h. Subsequently, the reaction mixture was quenched with water at 0°C and filtered with celite. Filter residue was washed with ethanol and methanol and filtrate was concentrated under reduced pressure to afford

the crude product. The crude product was purified in silica gel column chromatography using PE : EA = 2 : 1 as eluent to obtain the white solid (2.8 g, 88% yield).  $^1\text{H}$  NMR (500 MHz,  $\text{DMSO}-d_6$ )  $\delta$  = 7.73 - 7.68 (m, 1H), 7.61 - 7.57 (m, 1H), 7.51 (d,  $J$  = 8.5 Hz, 1H), 7.39 - 7.15 (m, 2H), 5.21 (t,  $J$  = 5.4 Hz, 2H), 4.61 (t,  $J$  = 5.6 Hz, 4H).  $^{13}\text{C}$  NMR (126 MHz,  $\text{DMSO}-d_6$ )  $\delta$  = 164.26, 162.31, 144.49, 140.52, 136.31, 127.90, 125.66, 111.32, 109.97, 102.79, 60.89, 60.55.

### Synthesis of (4-(naphthalen-2-yl)-1,2-phenylene)dimethanol (**5d**)

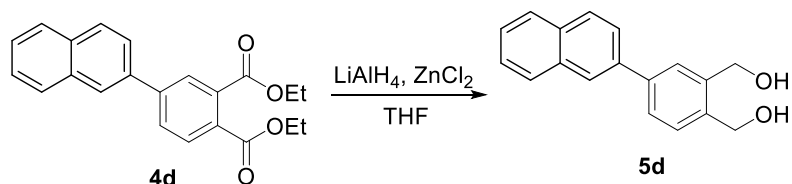

Lithium aluminum hydride (1.5 g, 39.3 mmol) and zinc chloride (1.5 g, 11 mmol) were dispersed in 90 mL tetrahydrofuran, then 70 mL tetrahydrofuran dissolved with diethyl 4-(naphthalen-2-yl)phthalate (**4d**, 4 g, 11.5 mmol) was added dropwise at  $0^\circ\text{C}$ . The reaction mixture returned to room temperature and stirred for 24 h. Subsequently, the reaction mixture was quenched with water at  $0^\circ\text{C}$  and filtered with celite. Filter residue was washed with ethanol and methanol and filtrate was concentrated under reduced pressure to afford the crude product. The crude product was purified in silica gel column chromatography using PE : EA = 2 : 1 as eluent to obtain the white solid (2.6 g, 85% yield).  $^1\text{H}$  NMR (500 MHz,  $\text{DMSO}-d_6$ )  $\delta$  = 8.22 (d,  $J$  = 1.9 Hz, 1H), 8.02 - 7.85 (m, 6H), 7.71 (dd,  $J$  = 7.9, 2.1 Hz, 1H), 7.57 - 7.50 (m, 2H), 5.28 - 5.2 (m, 2H), 4.67 (dd,  $J$  = 20.7, 5.5 Hz, 4H).  $^{13}\text{C}$  NMR (126 MHz,  $\text{DMSO}-d_6$ )  $\delta$  = 140.56, 139.33, 138.66, 138.13, 133.86, 132.64, 128.94, 128.62, 128.04, 127.97, 126.87, 126.47, 125.79, 125.53, 125.51, 125.31, 60.99, 60.69.

### Synthesis of 4-phenylphthalaldehyde (**6a**)

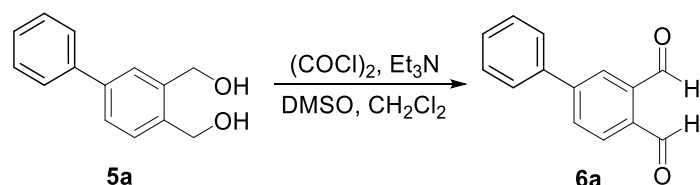

To a stirred solution of oxalyl chloride (4 mL, 46.8 mmol) in dichloromethane (50 mL) at  $-78^\circ\text{C}$  was added dimethyl sulfoxide (4 mL, 56.1 mmol) in dichloromethane (8 mL). After 2 h, a solution of 4-phenyl-1,2-benzenedimethanol (**5a**, 2 g, 9.3 mmol) in dichloromethane (50 mL) and dimethyl sulfoxide (3 mL) was added over 30 min to the reaction mixture. After 2 h, triethylamine (19.5 mL, 140.3 mmol) was added over 20 min. After 1 h at  $-78^\circ\text{C}$ , the reaction mixture was allowed to warm to room temperature then washed with water. The reaction mixture was concentrated under reduced pressure to afford the crude product. The crude product was purified in silica gel column chromatography using PE : EA = 20 : 1 as eluent to obtain the light yellow solid (1.6 g, 82% yield).  $^1\text{H}$  NMR (500 MHz,  $\text{chloroform}-d$ )  $\delta$  = 10.62 (s, 1H), 10.54 (s, 1H), 8.18 (d,  $J$  = 1.9 Hz, 1H), 8.05 - 7.96 (m, 2H), 7.67 - 7.66 (m, 2H), 7.52 - 7.44 (m, 3H).  $^{13}\text{C}$  NMR (126 MHz,  $\text{chloroform}-d$ )  $\delta$  = 192.40, 192.02, 146.70, 138.40, 136.96, 134.86, 132.19, 131.81, 129.49, 129.29,

129.15, 127.34.

### Synthesis of 4-(4'-methyl)phenyl phthalaldehyde (**6b**)

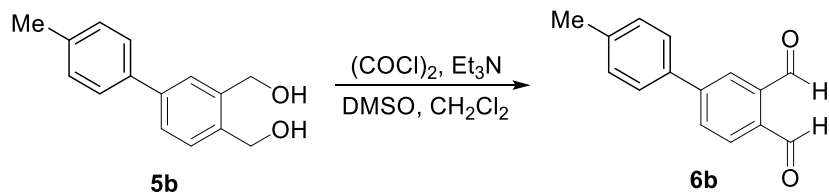

To a stirred solution of oxalyl chloride (5 mL, 59.1 mmol) in dichloromethane (60 mL) at  $-78^\circ\text{C}$  was added dimethyl sulfoxide (5 mL, 70.9 mmol) in dichloromethane (10 mL). After 2 h, a solution of (4'-methyl-[1,1'-biphenyl]-3,4-diyl)dimethanol (**5b**, 2.6 g, 11.4 mmol) in dichloromethane (60 mL) and dimethyl sulfoxide (3 mL) was added over 30 min to the reaction mixture. After 2 h, triethylamine (24.6 mL, 177.3 mmol) was added over 20 min. After 1 h at  $-78^\circ\text{C}$ , the reaction mixture was allowed to warm to room temperature then washed with water. The reaction mixture was concentrated under reduced pressure to afford the crude product. The crude product was purified in silica gel column chromatography using PE : EA = 20 : 1 as eluent to obtain the light yellow solid (2.1 g, 82% yield).  $^1\text{H}$  NMR (500 MHz, chloroform-*d*)  $\delta$  = 10.62 (s, 1H), 10.52 (s, 1H), 8.16 (d,  $J$  = 1.8 Hz, 1H), 8.02 (d,  $J$  = 7.9 Hz, 1H), 7.95 (dd,  $J$  = 7.9, 1.9 Hz, 1H), 7.57 - 7.56 (m, 2H), 7.30 (d,  $J$  = 7.9 Hz, 2H), 2.42 (s, 3H).  $^{13}\text{C}$  NMR (126 MHz, chloroform-*d*)  $\delta$  = 192.49, 192.01, 146.63, 139.35, 136.95, 135.45, 134.59, 132.21, 131.47, 130.01, 129.18, 127.17, 21.27.

### Synthesis of 3',4',5'-trifluoro-[1,1'-biphenyl]-3,4-dicarbaldehyde (**6c**)

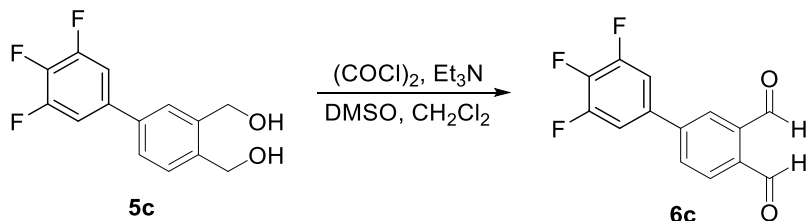

To a stirred solution of oxalyl chloride (3.2 mL, 37.6 mmol) in dichloromethane (40 mL) at  $-78^\circ\text{C}$  was added dimethyl sulfoxide (3.2 mL, 45 mmol) in dichloromethane (6 mL). After 2 h, a solution of (3',4',5'-trifluoro-[1,1'-biphenyl]-3,4-diyl)dimethanol (**5c**, 2 g, 7.5 mmol) in dichloromethane (40 mL) and dimethyl sulfoxide (2 mL) was added over 30 min to the reaction mixture. After 2 h, triethylamine (15 mL, 112.1 mmol) was added over 20 min. After 1 h at  $-78^\circ\text{C}$ , the reaction mixture was allowed to warm to room temperature then washed with water. The reaction mixture was concentrated under reduced pressure to afford the crude product. The crude product was purified in silica gel column chromatography using PE : EA = 20 : 1 as eluent to obtain the light yellow solid (1.6 g, 81% yield).  $^1\text{H}$  NMR (500 MHz, chloroform-*d*)  $\delta$  = 10.64 (s, 1H), 10.55 (s, 1H), 8.15 (d,  $J$  = 1.9 Hz, 1H), 8.08 (d,  $J$  = 7.9 Hz, 1H), 7.95 (dd,  $J$  = 7.9, 1.9 Hz, 1H), 7.27 - 7.18 (m, 2H).  $^{13}\text{C}$  NMR (126 MHz, chloroform-*d*)  $\delta$  = 191.84, 191.71, 164.59, 162.50, 144.17, 141.66, 137.07, 135.76, 132.38, 131.81, 129.32, 110.54, 110.33, 104.42.

### Synthesis of 4-(naphthalen-2-yl)phthalaldehyde (**6d**)

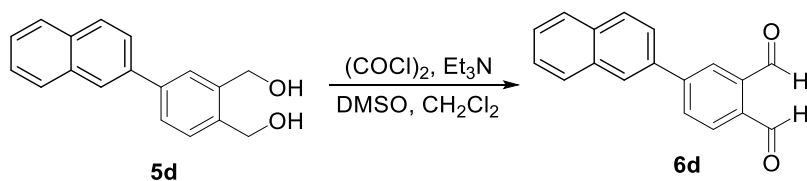

To a stirred solution of oxalyl chloride (5 mL, 59.1 mmol) in dichloromethane (60 mL) at  $-78^\circ\text{C}$  was added dimethyl sulfoxide (5 mL, 70.9 mmol) in dichloromethane (10 mL). After 2 h, a solution of (4-(naphthalen-2-yl)-1,2-phenylene)dimethanol (**5d**, 3 g, 11.4 mmol) in dichloromethane (60 mL) and dimethyl sulfoxide (3 mL) was added over 30 min to the reaction mixture. After 2 h, triethylamine (24.6 mL, 177.3 mmol) was added over 20 min. After 1 h at  $-78^\circ\text{C}$ , the reaction mixture was allowed to warm to room temperature then washed with water. The reaction mixture was concentrated under reduced pressure to afford the crude product. The crude product was purified in silica gel column chromatography using PE : EA = 20 : 1 as eluent to obtain the light yellow solid (2.4 g, 81% yield).  $^1\text{H}$  NMR (500 MHz, chloroform-*d*)  $\delta$  = 10.64 (s, 1H), 10.52 (s, 1H), 8.27 (d,  $J$  = 1.8 Hz, 1H), 8.11 (d,  $J$  = 1.9 Hz, 1H), 8.07 - 8.02 (m, 2H), 7.95 - 7.85 (m, 3H), 7.75 (dd,  $J$  = 8.5, 1.9 Hz, 1H), 7.55 - 7.53 (m, 2H).  $^{13}\text{C}$  NMR (126 MHz, chloroform-*d*)  $\delta$  = 192.43, 192.01, 146.58, 136.99, 135.59, 134.81, 133.51, 133.37, 132.30, 131.96, 129.59, 129.16, 128.54, 127.80, 127.08, 126.94, 126.86, 124.71.

### Synthesis of 2,9-diphenylpentacene-6,13-dione (**7a**)

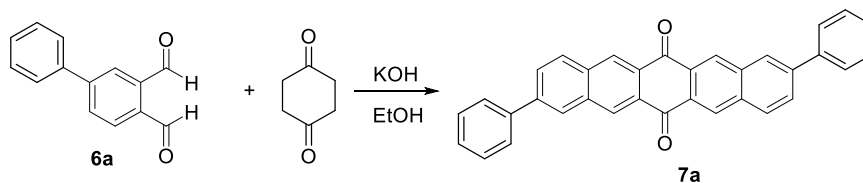

Aqueous KOH (15%, 2.98 g, 53.12 mmol) was slowly added to a solution of 4-phenylphthalaldehyde (**6a**, 5.58 g, 26.56 mmol) and 1,4-cyclohexanedione (1.49 g, 13.28 mmol) in ethanol (160 mL) under a  $\text{N}_2$  atmosphere. The solution turned from yellow to golden brown to dark brown before a brown solid corresponding to 2,9-diphenylpentacene-6,13-dione precipitated. After stirring the reaction mixture for 3h, the crude reaction mixture was filtered and washed with ethanol, water, and methanol until the washings were colorless. The solid residue was dried under reduced pressure to obtain 4.52 g (74% yield) of brown 2,9-diphenylpentacene-6,13-dione. The product was used for next reaction without further purification because of poor solubility.

### Synthesis of 2,9-di-*p*-tolylpentacene-6,13-dione (**7b**)

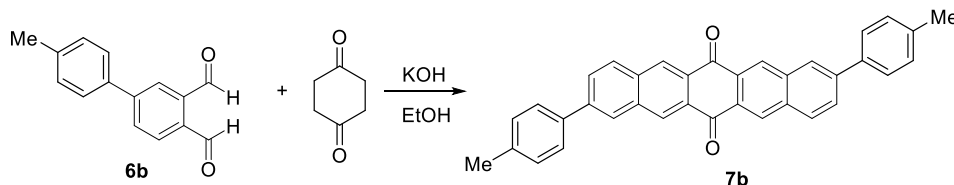

Aqueous KOH (15%, 2.1 g, 37.5 mmol) was slowly added to a solution of 4-(4'-methyl)phenylphthalaldehyde (**6b**, 4.2 g, 18.74 mmol) and 1,4-cyclohexanedione (1.05 g, 9.38 mmol) in ethanol (110 mL) under a  $\text{N}_2$  atmosphere. The solution turned from yellow to golden brown to dark brown



before a brown solid corresponding to 2,9-di-*p*-tolylpentacene-6,13-dione precipitated. After stirring the reaction mixture for 3h, the crude reaction mixture was filtered and washed with ethanol, water, and methanol until the washings were colorless. The solid residue was dried under reduced pressure to obtain 3.38 g (74% yield) of brown 2,9-di-*p*-tolylpentacene-6,13-dione. The product was used for next reaction without further purification because of poor solubility.

### Synthesis of 2,9-bis(3,4,5-trifluorophenyl)pentacene-6,13-dione (7c)

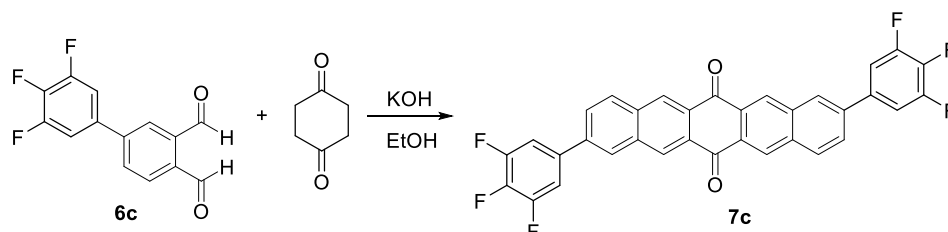

Aqueous KOH (15%, 1.7 g, 30.3 mmol) was slowly added to a solution of 3',4',5'-trifluoro-[1,1'-biphenyl]-3,4-dicarbaldehyde (**6c**, 4 g, 15.15 mmol) and 1,4-cyclohexanedione (0.847 g, 7.57 mmol) in ethanol (90 mL) under a N<sub>2</sub> atmosphere. The solution turned from yellow to golden brown to dark brown before a brown solid corresponding to 2,9-bis(3,4,5-trifluorophenyl)pentacene-6,13-dione precipitated. After stirring the reaction mixture for 3h, the crude reaction mixture was filtered and washed with ethanol, water, and methanol until the washings were colorless. The solid residue was dried under reduced pressure to obtain 3.1g (72% yield) of brown 2,9-bis(3,4,5-trifluorophenyl)pentacene-6,13-dione. The product was used for next reaction without further purification because of poor solubility.

### Synthesis of 2,9-di(naphthalen-2-yl)pentacene-6,13-dione (7d)

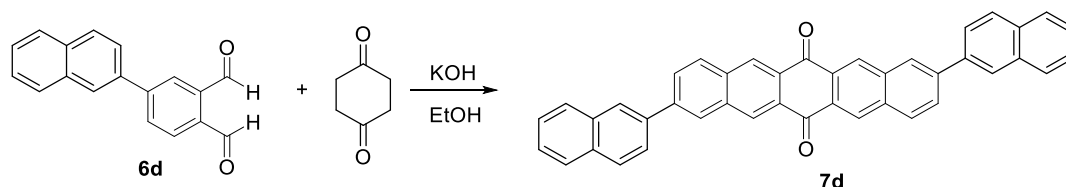

Aqueous KOH (15%, 2.15 g, 38.44 mmol) was slowly added to a solution of 4-(naphthalen-2-yl)phthalaldehyde (**6d**, 5 g, 19.22 mmol) and 1,4-cyclohexanedione (1.08 g, 9.61 mmol) in ethanol (110 mL) under a N<sub>2</sub> atmosphere. The solution turned from yellow to golden brown to dark brown before a brown solid corresponding to 2,9-di(naphthalen-2-yl)pentacene-6,13-dione precipitated. After stirring the reaction mixture for 3h, the crude reaction mixture was filtered and washed with ethanol, water, and methanol until the washings were colorless. The solid residue was dried under reduced pressure to obtain 4.04 g (75% yield) of brown 2,9-di(naphthalen-2-yl)pentacene-6,13-dione. The product was used for next reaction without further purification because of poor solubility.

### Synthesis of 2,9-diphenyl-6,13-bis(triisopropylsilylethynyl)pentacene (1a)

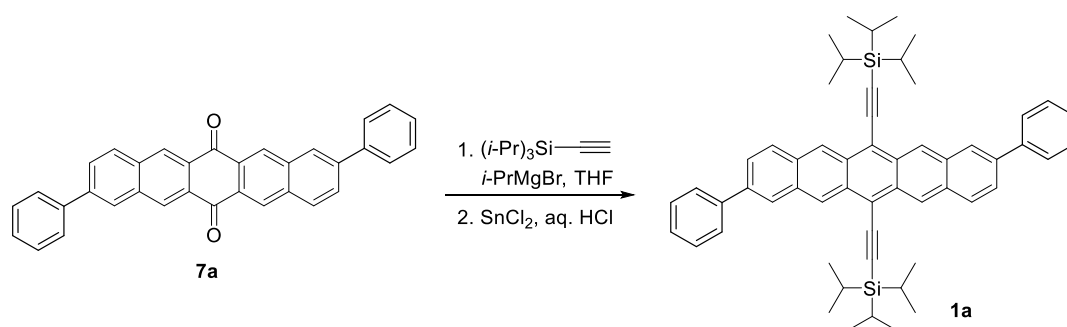

(Triisopropylsilyl)acetylene (1.4 mL, 6.24 mmol) was dissolved in 20 mL tetrahydrofuran under nitrogen atmosphere, then 2.6 mL of a 2.8 M solution of isopropyl magnesium bromide in tetrahydrofuran was added slowly. The reaction mixture was stirred for 4 h at 38°C, 2,9-diphenylpentacene-6,13-dione (**7a**, 0.3 g, 0.65 mmol) was added to the solution when the solution was allowed to cool. The reaction was stirred overnight at 38°C again. The reaction was combined with 1 mL of a stannous chloride (0.32 g, 1.7 mmol) solution in 10% HCl and was stirred for 5 min in the dark. The reaction mixture concentrated under reduced pressure then was purified in silica gel column chromatography using petroleum ether (PE) as eluent to obtain the dark green solid (0.2 g, 39% yield). <sup>1</sup>H NMR (500 MHz, chloroform-*d*)  $\delta$  = 9.33 (dd, *J* = 11.7, 3.3 Hz, 4H), 8.14 (s, 2H), 8.06 (d, *J* = 8.9 Hz, 2H), 7.80 (d, *J* = 7.6 Hz, 4H), 7.71 (dd, *J* = 9.0, 1.7 Hz, 2H), 7.53 (t, *J* = 7.6 Hz, 4H), 7.41 (t, *J* = 7.4 Hz, 2H), 1.39 (d, *J* = 5.6 Hz, 42H). <sup>13</sup>C NMR (126 MHz, chloroform-*d*)  $\delta$  = 140.87, 138.39, 132.54, 131.59, 130.99, 129.40, 129.03, 127.73, 127.33, 126.66, 126.53, 126.22, 125.94, 118.43, 107.31, 104.75, 19.11, 11.76. IR ( $\nu$  cm<sup>-1</sup>): 3062, 3033, 2940, 2857, 2131, 1627, 1590, 1460, 1365, 1014, 875, 744, 674. HRMS (APCI) *m/z* calculated for [C<sub>56</sub>H<sub>62</sub>Si<sub>2</sub>] 791.4390; found 791.4465 (M+H<sup>+</sup>).

### Synthesis of 2,9-di-*p*-tolyl-6,13-bis(triisopropylsilyl)ethynylpentacene (**1b**)

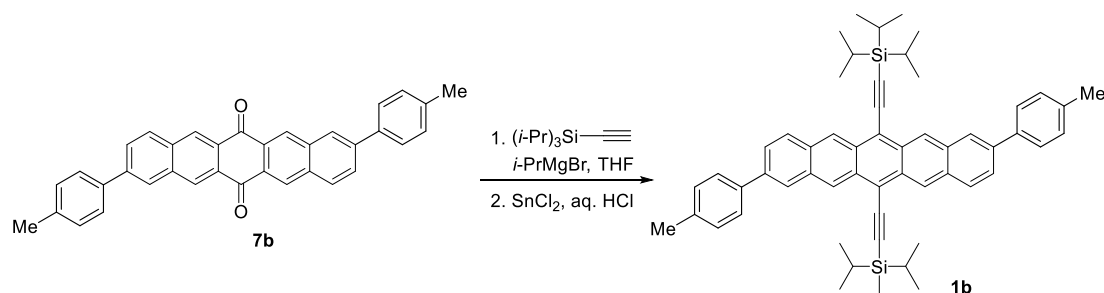

(Triisopropylsilyl)acetylene (1.4 mL, 6.24 mmol) was dissolved in 20 mL tetrahydrofuran under nitrogen atmosphere, then 2.6 mL of a 2.8 M solution of isopropyl magnesium bromide in tetrahydrofuran was added slowly. The reaction mixture was stirred for 4 h at 38°C, 2,9-di-*p*-tolylpentacene-6,13-dione (**7b**, 0.32 g, 0.65 mmol) was added to the solution when the solution was allowed to cool. The reaction was stirred overnight at 38°C again. The reaction was combined with 1 mL of a stannous chloride (0.32 g, 1.7 mmol) solution in 10% HCl and was stirred for 5 min in the dark. The reaction mixture concentrated under reduced pressure then was purified in silica gel column chromatography using petroleum ether (PE) as eluent to obtain the dark green solid (0.21 g, 40% yield). <sup>1</sup>H NMR (500 MHz, chloroform-*d*)  $\delta$  = 9.32 - 9.30 (m, 4H),

8.10 (s, 2H), 8.04 (d,  $J = 8.9$  Hz, 2H), 7.71 - 7.68 (m, 6H), 7.33 (d,  $J = 7.7$  Hz, 4H), 2.44 (s, 6H), 1.38 (d,  $J = 5.9$  Hz, 42H).  $^{13}\text{C}$  NMR (126 MHz, chloroform- $d$ )  $\delta = 138.27, 137.98, 137.59, 132.60, 131.50, 131.10, 129.72, 127.13, 126.44, 126.12, 125.42, 118.33, 107.16, 104.82, 21.23, 19.07, 11.76$ . IR ( $\nu$   $\text{cm}^{-1}$ ): 3027, 2945, 2890, 2133, 1627, 1567, 1462, 1367, 1018, 875, 746, 672. HRMS (APCI)  $m/z$  calculated for  $[\text{C}_{58}\text{H}_{66}\text{Si}_2]$  819.4703; found 819.4784 ( $\text{M}+\text{H}^+$ ).

### Synthesis of 2,9-bis(3,4,5-trifluorophenyl)-6,13-bis(triisopropylsilyl)ethynyl)pentacene (1c)

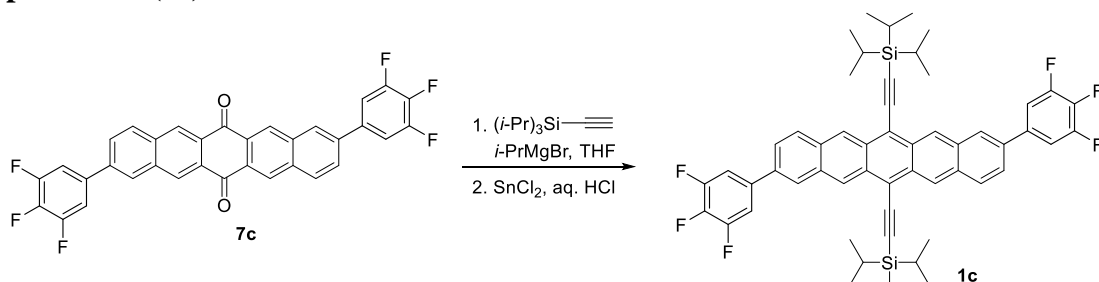

(Triisopropylsilyl)acetylene (1.4 mL, 6.24 mmol) was dissolved in 20 mL tetrahydrofuran under nitrogen atmosphere, then 2.6 mL of a 2.8 M solution of isopropyl magnesium bromide in tetrahydrofuran was added slowly. The reaction mixture was stirred for 4 h at 38°C, 2,9-bis(3,4,5-trifluorophenyl)pentacene-6,13-dione (**7c**, 0.37 g, 0.65 mmol) was added to the solution when the solution was allowed to cool. The reaction was stirred overnight at 38°C again. The reaction was combined with 1 mL of a stannous chloride (0.32 g, 1.7 mmol) solution in 10% HCl and was stirred for 5 min in the dark. The reaction mixture concentrated under reduced pressure then was purified in silica gel column chromatography using petroleum ether (PE) as eluent to obtain the dark blue solid (0.23 g, 39% yield).  $^1\text{H}$  NMR (500 MHz, chloroform- $d$ )  $\delta = 9.34 - 9.30$  (m, 4H), 8.09 - 8.01 (m, 4H), 7.62 - 7.53 (m, 2H), 7.37 (dd,  $J = 8.3, 6.2$  Hz, 2H), 7.30 - 7.26 (m, 2H), 1.40 (dd,  $J = 5.1, 3.4$  Hz, 42H).  $^{13}\text{C}$  NMR (126 MHz, Acetone- $d_6$ )  $\delta = 131.47, 131.13, 130.01, 129.86, 127.15, 126.58, 126.38, 125.57, 125.28, 118.65, 111.11, 109.99, 19.10 - 19.06$  (m), 11.73. IR ( $\nu$   $\text{cm}^{-1}$ ): 3047, 2939, 2860, 2133, 1621, 1588, 1500, 1367, 1245, 1014, 878, 746, 665. HRMS (APCI)  $m/z$  calculated for  $[\text{C}_{56}\text{H}_{56}\text{F}_6\text{Si}_2]$  899.3825; found 899.3887 ( $\text{M}+\text{H}^+$ ).

### Synthesis of 2,9-di(naphthalen-2-yl)-6,13-bis(triisopropylsilyl)ethynyl)pentacene (1d)

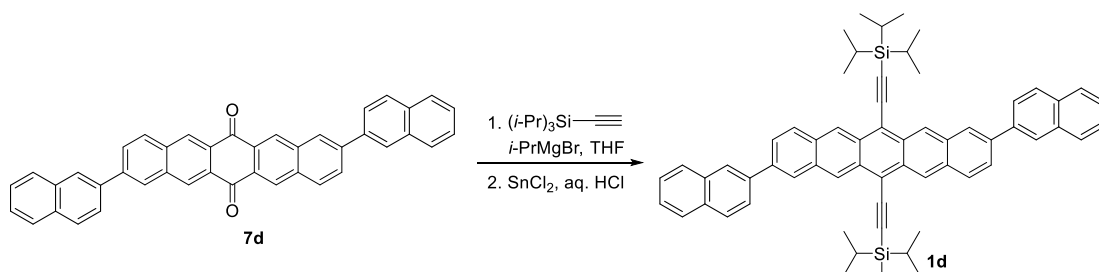

(Triisopropylsilyl)acetylene (1.4 mL, 6.24 mmol) was dissolved in 20 mL tetrahydrofuran under nitrogen atmosphere, then 2.6 mL of a 2.8 M solution of isopropyl magnesium bromide in tetrahydrofuran was added slowly. The reaction mixture was stirred for 4 h at 38°C,

2,9-di(naphthalen-2-yl)pentacene-6,13-dione (**7d**, 0.36 g, 0.65 mmol) was added to the solution when the solution was allowed to cool. The reaction was stirred overnight at 38°C again. The reaction was combined with 1 mL of a stannous chloride (0.32 g, 1.7 mmol) solution in 10% HCl and was stirred for 5 min in the dark. The reaction mixture concentrated under reduced pressure then was purified in silica gel column chromatography using petroleum ether (PE) as eluent to obtain the dark green solid (0.23 g, 40% yield). <sup>1</sup>H NMR (500 MHz, chloroform-*d*)  $\delta$  = 9.35 - 9.31 (m, 4H), 8.22 (d, *J* = 8.1 Hz, 4H), 8.09 (d, *J* = 9.0 Hz, 2H), 8.00 - 7.92 (m, 6H), 7.86 (dd, *J* = 21.4, 8.4 Hz, 4H), 7.54 - 7.48 (m, 4H), 1.41 (d, *J* = 5.9 Hz, 42H). <sup>13</sup>C NMR (126 MHz, chloroform-*d*)  $\delta$  = 138.18, 138.05, 133.75, 132.86, 131.13, 130.82, 129.47, 128.69, 128.37, 127.73, 126.68, 126.47, 126.22, 126.07, 125.39, 118.63, 107.30, 104.82, 19.13, 19.10, 11.78. IR ( $\nu$  cm<sup>-1</sup>): 3054, 2923, 2860, 2133, 1630, 1590, 1457, 1369, 1012, 876, 742, 676. HRMS (APCI) *m/z* calculated for [C<sub>64</sub>H<sub>66</sub>Si<sub>2</sub>] 891.4703; found 891.4791 (M+H<sup>+</sup>).

## 2.2 Evaluation tests

### Evaluation of sonodynamic effects

DPBF was used as a probe to detect the production of ROS. DPBF was dispersed in DMF solution (1 mg/mL), and then 100  $\mu$ L of DPBF solution was mixed with 8 mL of **S1**, **1a**, **1b**, **1c** and **1d** aqueous solutions. 200  $\mu$ L mixed solution was contained in each well in a 96-wells plates. Each well was treated different times with US (1 W/cm<sup>2</sup>, 1 MHz, 50% duty cycle). Then the absorbance of DPBF at 410 nm was measured for ROS detection after US.

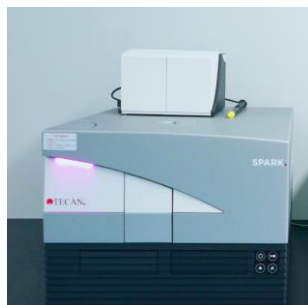

**Fig. S1.** The picture of for microplate reader for ROS determination

### The exploration of the US stability of **1d** in a simulated *in vivo* environment.

**1d** was dispersed in PBS solution (0.4 mg/mL), and 8mL **1d** PBS solution was mixed with 100  $\mu$ L of DPBF (1 mg/mL) DMF solution. 200  $\mu$ L mixed solution was contained in each well in a 96-wells plates. Each well was treated different times with US (1 W/cm<sup>2</sup>, 1 MHz, 50% duty cycle). Then the absorbance of DPBF at 410 nm was measured after US. After 24 h, 8mL **1d** PBS solution was mixed with 100  $\mu$ L of DPBF (1 mg/mL) DMF solution (freshly prepared). 200  $\mu$ L mixed solution was contained in each well in a 96-wells plates. Each well was treated different times with US (1 W/cm<sup>2</sup>, 1 MHz, 50% duty cycle). Then the absorbance of DPBF at 410 nm was measured after US. After 48 h, 8mL **1d** PBS solution was mixed with 100  $\mu$ L of DPBF (1 mg/mL) DMF solution (freshly prepared). 200  $\mu$ L mixed solution was contained in each well in a 96-wells plates. Each well was treated different times with US (1 W/cm<sup>2</sup>, 1 MHz, 50% duty cycle). Then the absorbance of DPBF at 410 nm was measured after US.

### Detection of $^1\text{O}_2$

The fluorescent probe singlet oxygen sensor green (SOSG) was used to detect  $^1\text{O}_2$ . 18  $\mu\text{L}$  of the SOSG storage solution (5 mM) was diluted to 1800  $\mu\text{L}$  with water to obtain the SOSG working solution (50  $\mu\text{M}$ ). Subsequently, 20  $\mu\text{L}$  SOSG working solution was mixed with 180  $\mu\text{L}$  of  $\text{H}_2\text{O}$ , **S1**, **1a**, **1b**, **1c** and **1d** aqueous solutions in each well in a 96-wells plates. Each well was treated different times with US (1  $\text{W}/\text{cm}^2$ , 1 MHz, 50% duty cycle). The fluorescence intensity of the mixed solution was measured ( $\lambda_{\text{ex}} = 504 \text{ nm}$ ,  $\lambda_{\text{em}} = 525 \text{ nm}$ ) after US.

### ESR measurements of $^1\text{O}_2$

2,2,6,6-Tetramethylpiperidine (TEMP) was employed as spin-trapping agents to detect  $^1\text{O}_2$ . Compound **1d** was dissolved in water at a dilution of 10  $\mu\text{M}$ , and then 25 mM TEMP was added into water with US irradiation (1  $\text{W}/\text{cm}^2$ , 1 MHz, 50% duty cycle). The EPR signal was recorded at room temperature. As a comparison, the control group was detected too.

### Detection of $\bullet\text{OH}$

TMB was used as a probe to detect  $\bullet\text{OH}$ . TMB was dispersed in DMF solution (5 mg/mL), and then 40  $\mu\text{L}$  of TMB solution was mixed with 3 mL of  $\text{H}_2\text{O}$ , **S1**, **1a**, **1b**, **1c** and **1d** aqueous solutions. 200  $\mu\text{L}$  mixed solution was contained in each well in a 96-wells plates. Each well was treated different times with US (1  $\text{W}/\text{cm}^2$ , 1 MHz, 50% duty cycle). Then the absorbance of TMB at 652 nm was measured for  $\bullet\text{OH}$  detection after US.

### Detection of $\text{O}_2^{\bullet-}$

20  $\mu\text{L}$  of  $\text{H}_2\text{O}$ , **S1**, **1a**, **1b**, **1c** and **1d** aqueous solutions in each well in a 96-wells plates. Each well was treated different times with US (1  $\text{W}/\text{cm}^2$ , 1 MHz, 50% duty cycle).  $\text{O}_2^{\bullet-}$  lysis buffer (1 eq.) and hydroxylamine solution (2 eq.) were added and mixed. After 20 min, sulfanilic acid solution (2 eq.) and naphthylamine solution (2 eq.) were added. Then the absorbance at 530 nm was measured after 30 min for  $\text{O}_2^{\bullet-}$  detection.

### *In vitro* cytotoxicity

4T1 cells were seeded into 96-wells plates with 100  $\mu\text{L}$  of culture medium at a density of 5000 cells per well and cultured for 12 h. Each well was washed 3 times with PBS, the medium of the cells was replaced with a serum-free medium containing different concentrations of **S1**, **1a**, **1b**, **1c** and **1d** for 8 h and then treated with US (1 min, 1  $\text{W}/\text{cm}^2$ , 1 MHz, 50% duty cycle). After 16 h of incubation, MTT solution (20  $\mu\text{L}$ ) was added to the culture medium and continue to incubate for 4 h. The medium was removed, following dimethyl sulfoxide (200  $\mu\text{L}$ ) was added to completely dissolve the product (formazan) and the absorbance was measured at 570 nm using the microplate reader.

### Evaluation of the biocompatibility

NCTC 1469 cells and L02 cells were seeded into 96-wells plates with 100  $\mu\text{L}$  of culture medium at a density of 5000 cells per well and cultured for 12 h. Each well was washed 3 times

with PBS, the medium of the cells was replaced with a serum-free medium containing different concentrations of **S1**, **1a**, **1b**, **1c** and **1d** for 24 h of incubation. Then, MTT solution (20  $\mu$ L) was added to the culture medium and continue to incubate for 4 h. The medium was removed, following dimethyl sulfoxide (200  $\mu$ L) was added to completely dissolve the product (formazan) and the absorbance was measured at 570 nm using the microplate reader.

### Live/dead staining assay

4T1 cells were seeded into 6-wells plates with 2 mL of culture medium at a density of  $6 \times 10^5$  cells per well and cultured for 12 h. Each well was washed 3 times with PBS, followed by incubating with **S1** (85  $\mu$ M), **1a** (85  $\mu$ M), **1b** (85  $\mu$ M), **1c** (85  $\mu$ M) and **1d**(85  $\mu$ M) for 8 h. Cells were treated with US (1 min, 1 W/cm<sup>2</sup>, 1 MHz, 50% duty cycle) and continue to incubate for 16 h. Afterwards, cells were washed with PBS, and stained with calcein-AM (2  $\mu$ M) and propidium iodide (PI, 8  $\mu$ M) for 30 min. Finally, the 4T1 cells were observed by an inverted fluorescence microscope.

### Measurement of intracellular ROS levels

4T1 cells were seeded into 6-wells plates with 2 mL of culture medium at a density of  $6 \times 10^5$  cells per well and cultured for 12 h. Each well was washed 3 times with PBS, followed by incubating with **S1** (85  $\mu$ M), **1a** (85  $\mu$ M), **1b** (85  $\mu$ M), **1c** (85  $\mu$ M) and **1d**(85  $\mu$ M) for 10 h. After washing with PBS, DCFH-DA probe was added and incubated for 15 min, then, the US, **S1**+US, **1a**+US, **1b**+US, **1c**+US and **1d**+US groups were treated with US (1 min, 1 W/cm<sup>2</sup>, 1 MHz, 50% duty cycle). Finally, the 4T1 cells were observed by an inverted fluorescence microscope.

### Pharmacokinetic studies in rats

Sprague Dawley rats were used to evaluate the pharmacokinetics of **S1**, **1a**, **1b**, **1c** and **1d**. The concentrations of **S1**, **1a**, **1b**, **1c** and **1d** in plasma were measured using HPLC. **S1** (5.4 mg/kg), **1a** (5.5 mg/kg), **1b** (5.0 mg/kg), **1c** (7.0 mg/kg) and **1d** (4.8 mg/kg) were separately injected through the tail vein (n = 6), and blood samples were collected at predetermined intervals. Plasma was obtained by centrifugation at 10 000 rpm for 10 min, followed by adding 200  $\mu$ L of acetonitrile. The mixture was vortexed for 2 min, centrifuged at 12 000 rpm for 10 min, and measured by HPLC. Pharmacokinetic parameters were calculated by PKSolver V2.0.

### *In vivo* antitumor effects

For *in vivo* experiments,  $1 \times 10^7$  4T1 cells were subcutaneously injected into female BALB/c mice. When tumor volume reached  $\approx 100 \text{ mm}^3$ , mice were assigned into three groups at random (n = 6 for each group) as following: Control (saline) + US; **S1** (135  $\mu$ M) + US; **1d** (85  $\mu$ M) + US. The treatment process was after intratumoral injection of corresponding drugs and US treatment (2 min, 1 W/cm<sup>2</sup>, 1 MHz, 50% duty cycle) was performed in each group, every 2 days for 14 days. Tumor volumes and body weights were measured every 2 days. At the end of treatment, mice were sacrificed, and tumors were collected, weighted, imaged, and analyzed by H&E and TUNEL stains. The major organs, including heart, liver, spleen, lung, and kidneys were also harvested and analyzed by H&E stains.

## 2.3 Statistical analysis

All experimental results shown in this article were based on data from at least three separate experiments, and all data are presented as mean  $\pm$  SD. Graphpad Prism 9.5 software was used for all statistical comparisons and data were analyzed via Student's t-test: \*\*  $p < 0.005$ , \*\*\*  $p < 0.0005$ .

## 3. DFT Calculations

The Gaussian 09 program was used for all the DFT calculations <sup>[2]</sup>. The ground-state ( $S_0$ ) geometry of the complexes was using restricted DFT at M06-2X/def2-SVP level. For all the vertical excitation ( $S_1$ ) energy was performed with TDDFT method with M06-2X/def2-SVP level.

**Table S1.** Cartesian coordinates for all optimized geometries of **S1**.

The excitation energy of **S1** is 2.0330 eV.

|   |             |             |             |
|---|-------------|-------------|-------------|
| C | -0.76981800 | -1.08453000 | 0.04695300  |
| C | -1.52291300 | 0.11419500  | 0.02755700  |
| C | -0.88156500 | 1.37523400  | 0.00275100  |
| C | 0.56035100  | 1.44152200  | -0.00233900 |
| C | 1.31388400  | 0.24393000  | 0.01449400  |
| C | 0.67194500  | -1.01821200 | 0.03876100  |
| C | -1.61795900 | 2.57888900  | -0.01685700 |
| C | 1.18300700  | 2.70784500  | -0.02398800 |
| C | 0.44859400  | 3.87975700  | -0.03644400 |
| C | -0.99454700 | 3.81288200  | -0.03329000 |
| C | -1.74053000 | 5.04127800  | -0.04731700 |
| H | -2.82591900 | 4.98258300  | -0.04348700 |
| C | -1.10452300 | 6.24143600  | -0.06255500 |
| C | 0.32990800  | 6.30823900  | -0.06572300 |
| C | 1.07577000  | 5.17306800  | -0.05329200 |
| H | -2.70323700 | 2.52427300  | -0.02244900 |
| H | 2.26869100  | 2.75276300  | -0.03423300 |
| H | -1.67720700 | 7.16355600  | -0.07180900 |
| H | 0.81375300  | 7.28001400  | -0.07788800 |
| H | 2.16171900  | 5.21727000  | -0.05436700 |
| C | -0.54248100 | -5.95027500 | 0.14430100  |
| C | -1.28787000 | -4.81478600 | 0.12602000  |
| C | -0.65948400 | -3.52245400 | 0.09451500  |
| C | 0.78327300  | -3.45628500 | 0.08422600  |
| C | 1.52879000  | -4.68474700 | 0.10445600  |
| C | 0.89198500  | -5.88433400 | 0.13277500  |
| H | -2.47957300 | -2.39627900 | 0.07642300  |
| H | -1.02664400 | -6.92165700 | 0.16927600  |
| H | -2.37404400 | -4.85728500 | 0.13668200  |

|    |             |             |             |
|----|-------------|-------------|-------------|
| C  | -1.39365700 | -2.35041600 | 0.07372800  |
| C  | 1.40772900  | -2.22271900 | 0.05571900  |
| H  | 2.61428600  | -4.62624600 | 0.09772000  |
| H  | 1.46405800  | -6.80677300 | 0.14796800  |
| H  | 2.49308700  | -2.17123700 | 0.04589500  |
| C  | -2.94630400 | 0.04501100  | 0.02899500  |
| C  | -4.16359100 | -0.03057300 | 0.02473500  |
| Si | -5.99902900 | -0.21345600 | -0.03652400 |
| C  | 2.73857700  | 0.29521100  | 0.00604800  |
| C  | 3.95808800  | 0.30076800  | -0.00055800 |
| Si | 5.80140300  | 0.17261800  | -0.06209200 |
| C  | -6.45919600 | -0.79497500 | -1.79356500 |
| H  | -7.51438900 | -0.51013800 | -1.93215400 |
| C  | -6.78632600 | 1.47630800  | 0.35542400  |
| H  | -7.81032300 | 1.25257200  | 0.69443200  |
| C  | -6.50456900 | -1.52642400 | 1.25040300  |
| H  | -7.44787800 | -1.95251100 | 0.87390700  |
| C  | 6.53480300  | 1.88391200  | 0.31941500  |
| H  | 6.49803300  | 2.45351600  | -0.62137300 |
| C  | 6.19055400  | -0.35764600 | -1.84393700 |
| H  | 5.60502000  | 0.34539700  | -2.45548800 |
| C  | 6.30998100  | -1.08982200 | 1.27086100  |
| H  | 6.36589300  | -0.50981700 | 2.20541300  |
| C  | 7.99913000  | 1.79891900  | 0.77460600  |
| H  | 8.63935900  | 1.28328700  | 0.05110300  |
| H  | 8.41447900  | 2.80182400  | 0.93017900  |
| H  | 8.07845900  | 1.26423600  | 1.72917500  |
| C  | 5.70856800  | 2.63565000  | 1.37070400  |
| H  | 5.68079000  | 2.08189900  | 2.31757600  |
| H  | 6.14855200  | 3.61818600  | 1.58081200  |
| H  | 4.67347500  | 2.78454000  | 1.04966600  |
| C  | 7.66339200  | -0.20310500 | -2.24430500 |
| H  | 7.80855800  | -0.48981300 | -3.29317300 |
| H  | 8.00810500  | 0.83076400  | -2.13530200 |
| H  | 8.31839300  | -0.84054900 | -1.63987100 |
| C  | 5.67548100  | -1.77013700 | -2.14676200 |
| H  | 4.61537100  | -1.87812400 | -1.88992500 |
| H  | 5.78815000  | -2.00656500 | -3.21178900 |
| H  | 6.23673800  | -2.52576600 | -1.58490000 |
| C  | 5.26612400  | -2.19697900 | 1.47533800  |
| H  | 5.13129300  | -2.78661400 | 0.55954600  |
| H  | 5.58715200  | -2.88835300 | 2.26422300  |
| H  | 4.29086800  | -1.78874200 | 1.75594700  |
| C  | 7.69246900  | -1.71012800 | 1.01756100  |



|   |             |             |             |
|---|-------------|-------------|-------------|
| H | 8.47659900  | -0.95866900 | 0.88145800  |
| H | 7.98660500  | -2.34845500 | 1.85946200  |
| H | 7.67931100  | -2.34203900 | 0.12205100  |
| C | -6.35269300 | -2.31530600 | -1.96776900 |
| H | -6.97003000 | -2.86876800 | -1.25280300 |
| H | -6.66733500 | -2.60816900 | -2.97678800 |
| H | -5.31390500 | -2.64586000 | -1.84525800 |
| C | -5.62017900 | -0.10713600 | -2.87983600 |
| H | -5.69109900 | 0.98308000  | -2.84636100 |
| H | -4.56294500 | -0.37046300 | -2.76629300 |
| H | -5.94168100 | -0.43297500 | -3.87660400 |
| C | -6.88746300 | 2.39318300  | -0.86991500 |
| H | -7.45256600 | 1.93797100  | -1.68957400 |
| H | -7.38352200 | 3.33468400  | -0.60425600 |
| H | -5.88965500 | 2.64692600  | -1.24904100 |
| C | -6.05471900 | 2.21698200  | 1.48363400  |
| H | -6.55494800 | 3.16735100  | 1.70702900  |
| H | -6.00724100 | 1.63932300  | 2.41020500  |
| H | -5.02391700 | 2.44483700  | 1.18848200  |
| C | -5.47266500 | -2.65845300 | 1.36192200  |
| H | -5.82283500 | -3.43292100 | 2.05516200  |
| H | -5.26736600 | -3.13870700 | 0.40038800  |
| H | -4.52333000 | -2.26945100 | 1.74774300  |
| C | -6.77490700 | -0.95044500 | 2.64583900  |
| H | -7.53190300 | -0.15935100 | 2.63515000  |
| H | -7.12574000 | -1.73769800 | 3.32412700  |
| H | -5.85744000 | -0.53509900 | 3.07885800  |

**Table S2.** Cartesian coordinates for all optimized geometries of **1a**.

The excitation energy of **1a** is 2.0360 eV.

|   |             |             |            |
|---|-------------|-------------|------------|
| C | -1.34674900 | 0.03912600  | 0.03524200 |
| C | -0.81566000 | -1.27418100 | 0.04169400 |
| C | 0.58145200  | -1.49278000 | 0.05151100 |
| C | 1.47958300  | -0.36267200 | 0.05233000 |
| C | 0.94968300  | 0.94995100  | 0.04482100 |
| C | -0.44864300 | 1.16915000  | 0.04080500 |
| C | 1.12674700  | -2.79503900 | 0.05525800 |
| C | 2.87072700  | -0.59867700 | 0.05859400 |
| C | 3.39148000  | -1.88061600 | 0.06136200 |
| C | 2.49160500  | -3.00992300 | 0.05676600 |
| C | 3.05937100  | -4.33020500 | 0.05663600 |
| H | 2.38389100  | -5.18165200 | 0.06647300 |
| C | 4.40342300  | -4.51216100 | 0.05577800 |
| C | 5.31439600  | -3.39191700 | 0.05802900 |

|    |             |             |             |
|----|-------------|-------------|-------------|
| C  | 4.80488900  | -2.12531800 | 0.06025100  |
| H  | 0.44725900  | -3.64289000 | 0.05684100  |
| H  | 3.54235300  | 0.25526800  | 0.06719300  |
| H  | 4.81701100  | -5.51603300 | 0.08198700  |
| H  | 5.47165700  | -1.26675400 | 0.03067700  |
| C  | -5.18239100 | 3.06626000  | -0.00596000 |
| C  | -4.67212400 | 1.79992700  | -0.00080600 |
| C  | -3.25879000 | 1.55661000  | 0.01623300  |
| C  | -2.35957700 | 2.68591800  | 0.02320000  |
| C  | -2.92774900 | 4.00590100  | 0.01684000  |
| C  | -4.27197600 | 4.18697400  | 0.00166500  |
| H  | -3.41072900 | -0.57871400 | 0.01642400  |
| H  | -5.33770400 | 0.94039900  | -0.03809700 |
| C  | -2.73802600 | 0.27466400  | 0.02146400  |
| C  | -0.99435900 | 2.47174300  | 0.03811700  |
| H  | -2.25228300 | 4.85745700  | 0.03310300  |
| H  | -4.68646700 | 5.19058700  | 0.02365200  |
| H  | -0.31683300 | 3.32128200  | 0.05043700  |
| C  | -1.71256100 | -2.38198100 | 0.03351900  |
| C  | -2.51299600 | -3.30223900 | 0.02429400  |
| Si | -3.82834000 | -4.59747900 | -0.01171200 |
| C  | 1.83153700  | 2.07017400  | 0.03202300  |
| C  | 2.57089400  | 3.03984400  | 0.01258500  |
| Si | 3.63110400  | 4.55375500  | 0.01701300  |
| C  | -4.88862900 | -4.39779600 | 1.56047100  |
| H  | -5.36708600 | -5.37768800 | 1.71720700  |
| C  | -3.00102400 | -6.31231300 | -0.06213600 |
| H  | -3.74652700 | -6.98296700 | -0.51791600 |
| C  | -4.87814100 | -4.29980500 | -1.57523800 |
| H  | -5.85891200 | -4.75323800 | -1.36102100 |
| C  | 5.37001400  | 4.05302200  | -0.56793200 |
| H  | 5.87728300  | 3.61512300  | 0.30512000  |
| C  | 3.65686100  | 5.12846200  | 1.82734200  |
| H  | 3.89371400  | 4.20917100  | 2.38409900  |
| C  | 2.84399900  | 5.78768300  | -1.20277800 |
| H  | 3.23562600  | 5.50057700  | -2.19142700 |
| C  | 6.19265800  | 5.25642000  | -1.05024200 |
| H  | 6.28634000  | 6.03964800  | -0.29092300 |
| H  | 7.20522100  | 4.94360900  | -1.33215500 |
| H  | 5.73470600  | 5.70789600  | -1.93885000 |
| C  | 5.30963200  | 2.99160100  | -1.67391000 |
| H  | 4.77908500  | 3.37414200  | -2.55508100 |
| H  | 6.31856900  | 2.70991300  | -1.99885700 |
| H  | 4.78844000  | 2.08663300  | -1.34842600 |

|   |             |             |             |
|---|-------------|-------------|-------------|
| C | 4.74760800  | 6.15716700  | 2.15010600  |
| H | 4.73017900  | 6.41433500  | 3.21636300  |
| H | 5.74767100  | 5.77401500  | 1.92101300  |
| H | 4.60768400  | 7.08827000  | 1.58954100  |
| C | 2.27851100  | 5.60957600  | 2.29863000  |
| H | 1.49902300  | 4.86722800  | 2.09261400  |
| H | 2.28090900  | 5.80281900  | 3.37812200  |
| H | 1.99267900  | 6.54423300  | 1.80222000  |
| C | 1.31425900  | 5.67625100  | -1.26095100 |
| H | 0.86323400  | 5.89706000  | -0.28522200 |
| H | 0.90268200  | 6.39369800  | -1.98142300 |
| H | 0.99293700  | 4.67352100  | -1.55754500 |
| C | 3.26029400  | 7.24203500  | -0.93737100 |
| H | 4.34674200  | 7.37414500  | -0.91623400 |
| H | 2.86099600  | 7.90431400  | -1.71517300 |
| H | 2.86477400  | 7.59543700  | 0.02166100  |
| C | -6.00095500 | -3.35184400 | 1.41433700  |
| H | -6.66731000 | -3.56013200 | 0.57119900  |
| H | -6.61307300 | -3.31453100 | 2.32361600  |
| H | -5.57515500 | -2.35094400 | 1.27034900  |
| C | -4.04241100 | -4.06429500 | 2.79761600  |
| H | -3.25526800 | -4.79945200 | 2.98441400  |
| H | -3.55831000 | -3.08910100 | 2.67482900  |
| H | -4.67352700 | -4.01485900 | 3.69337000  |
| C | -2.66028900 | -6.86653200 | 1.32661100  |
| H | -3.53459100 | -6.92304900 | 1.98295500  |
| H | -2.23986500 | -7.87614800 | 1.24365800  |
| H | -1.90736600 | -6.24123300 | 1.82131500  |
| C | -1.74026700 | -6.32526200 | -0.93752100 |
| H | -1.32080800 | -7.33698500 | -0.99644000 |
| H | -1.92760300 | -5.98034100 | -1.95781100 |
| H | -0.97330200 | -5.67086800 | -0.50704800 |
| C | -5.08700200 | -2.80629900 | -1.86621600 |
| H | -5.73496400 | -2.67200500 | -2.74101900 |
| H | -5.54534700 | -2.27068900 | -1.02953600 |
| H | -4.12832400 | -2.32206700 | -2.08363100 |
| C | -4.30881300 | -4.98158200 | -2.82611400 |
| H | -4.17862500 | -6.06080500 | -2.69514900 |
| H | -4.97607200 | -4.82765600 | -3.68284900 |
| H | -3.33519700 | -4.55340500 | -3.09270100 |
| C | -6.64437200 | 3.31107500  | -0.02480500 |
| C | -7.18130700 | 4.37291300  | -0.76241300 |
| C | -7.51972900 | 2.48455800  | 0.68968600  |
| C | -8.55369100 | 4.59638500  | -0.79195600 |

|   |              |             |             |
|---|--------------|-------------|-------------|
| H | -6.51942600  | 5.01218200  | -1.34027300 |
| C | -8.89184000  | 2.70735900  | 0.66037100  |
| H | -7.11407200  | 1.67766600  | 1.29367300  |
| C | -9.41438800  | 3.76430400  | -0.08095300 |
| H | -8.95208600  | 5.41945100  | -1.37761300 |
| H | -9.55362800  | 2.06080700  | 1.22872800  |
| H | -10.48532000 | 3.94073900  | -0.10114300 |
| C | 6.77629000   | -3.63785300 | 0.05051400  |
| C | 7.31785200   | -4.69836200 | -0.68568300 |
| C | 7.64698300   | -2.81365400 | 0.77330500  |
| C | 8.69026700   | -4.92263200 | -0.70592300 |
| H | 6.65976400   | -5.33574400 | -1.26990000 |
| C | 9.01915000   | -3.03721400 | 0.75325400  |
| H | 7.23728100   | -2.00812600 | 1.37632700  |
| C | 9.54635500   | -4.09268700 | 0.01311400  |
| H | 9.09242100   | -5.74450900 | -1.29068100 |
| H | 9.67729200   | -2.39251200 | 1.32790100  |
| H | 10.61730500  | -4.26967000 | 0.00004900  |

**Table S3.** Cartesian coordinates for all optimized geometries of **1b**.

The excitation energy of **1b** is 2.0023 eV.

|   |             |             |            |
|---|-------------|-------------|------------|
| C | -1.35210100 | -0.17471000 | 0.07462300 |
| C | -0.59837900 | -1.37355600 | 0.06821900 |
| C | 0.81591000  | -1.34312100 | 0.07174000 |
| C | 1.50119000  | -0.07241800 | 0.07283000 |
| C | 0.74798900  | 1.12624900  | 0.06102200 |
| C | -0.66718100 | 1.09551700  | 0.06431300 |
| C | 1.58257900  | -2.52911600 | 0.06955600 |
| C | 2.91202300  | -0.05930300 | 0.08052300 |
| C | 3.65093000  | -1.22947400 | 0.08258600 |
| C | 2.96405400  | -2.49957200 | 0.07093100 |
| C | 3.75536600  | -3.69912200 | 0.06422600 |
| H | 3.23960200  | -4.65594400 | 0.06623700 |
| C | 5.11050600  | -3.64166100 | 0.06658700 |
| C | 5.80996000  | -2.37852200 | 0.08182900 |
| C | 5.08531900  | -1.22136800 | 0.08798600 |
| H | 1.06350600  | -3.48410400 | 0.07136800 |
| H | 3.42310200  | 0.89959500  | 0.09082700 |
| H | 5.69467500  | -4.55702500 | 0.08592200 |
| H | 5.59154400  | -0.25897300 | 0.06686600 |
| C | -5.66233400 | 2.12638800  | 0.04348100 |
| C | -4.93682500 | 0.96999500  | 0.06999500 |
| C | -3.50257500 | 0.98048800  | 0.07111400 |
| C | -2.81666400 | 2.25048400  | 0.04624500 |

|    |             |             |             |
|----|-------------|-------------|-------------|
| C  | -3.60864900 | 3.44922600  | 0.01974100  |
| C  | -4.96382900 | 3.38999300  | 0.01525300  |
| H  | -3.27385700 | -1.14749400 | 0.11017100  |
| H  | -5.44106000 | 0.00602800  | 0.05809500  |
| C  | -2.76287000 | -0.18901100 | 0.08498000  |
| C  | -1.43501700 | 2.28105300  | 0.05088400  |
| H  | -3.09324200 | 4.40637600  | 0.01018700  |
| H  | -5.54919400 | 4.30479600  | 0.01871700  |
| H  | -0.91807500 | 3.23693100  | 0.04307400  |
| C  | -1.27880100 | -2.62563200 | 0.04139400  |
| C  | -1.87181700 | -3.69078600 | 0.00452100  |
| Si | -2.78373800 | -5.29438300 | -0.05894600 |
| C  | 1.41387100  | 2.38664000  | 0.03547800  |
| C  | 1.95417000  | 3.47962200  | 0.00314900  |
| Si | 2.64983700  | 5.19270700  | -0.01355300 |
| C  | -3.13745800 | -5.84153000 | 1.73093300  |
| H  | -3.29671000 | -6.93043100 | 1.67945800  |
| C  | -1.68573700 | -6.56187900 | -0.96349200 |
| H  | -2.37667300 | -7.33243000 | -1.34008800 |
| C  | -4.41914100 | -5.00713600 | -0.99779900 |
| H  | -5.11578400 | -5.76256900 | -0.60216800 |
| C  | 4.48391900  | 5.08976800  | -0.50429100 |
| H  | 5.03574800  | 4.81290900  | 0.40656900  |
| C  | 2.45168300  | 5.81254500  | 1.77088700  |
| H  | 2.86980200  | 4.99202500  | 2.37373400  |
| C  | 1.66306300  | 6.17498500  | -1.31423900 |
| H  | 2.15765600  | 5.95533100  | -2.27347400 |
| C  | 5.02850300  | 6.43521500  | -1.00698000 |
| H  | 4.90094000  | 7.24347500  | -0.27910100 |
| H  | 6.09878400  | 6.35808500  | -1.23345900 |
| H  | 4.52281400  | 6.73719000  | -1.93233400 |
| C  | 4.72469900  | 4.00570500  | -1.56304900 |
| H  | 4.16470200  | 4.22410700  | -2.48102700 |
| H  | 5.78620800  | 3.95546800  | -1.83430000 |
| H  | 4.41110900  | 3.01622900  | -1.21793800 |
| C  | 3.25386700  | 7.07904400  | 2.09540000  |
| H  | 3.11866200  | 7.36096000  | 3.14686200  |
| H  | 4.32647700  | 6.93334800  | 1.92924000  |
| H  | 2.93284000  | 7.93155600  | 1.48649100  |
| C  | 0.97780700  | 5.96813700  | 2.16439100  |
| H  | 0.40507400  | 5.05829600  | 1.95131300  |
| H  | 0.87966400  | 6.18321200  | 3.23532800  |
| H  | 0.50741400  | 6.79670000  | 1.62231800  |
| C  | 0.20370600  | 5.71418800  | -1.43068800 |

|   |             |             |             |
|---|-------------|-------------|-------------|
| H | -0.33467300 | 5.86332600  | -0.48595200 |
| H | -0.32285100 | 6.29026900  | -2.20152700 |
| H | 0.13390000  | 4.65382100  | -1.69008700 |
| C | 1.72332100  | 7.69327100  | -1.09056400 |
| H | 2.74845600  | 8.07068200  | -1.01849100 |
| H | 1.23144100  | 8.22312200  | -1.91526700 |
| H | 1.20074600  | 7.97432900  | -0.16901400 |
| C | -4.40654300 | -5.20632200 | 2.31509700  |
| H | -5.29851600 | -5.40957600 | 1.71363400  |
| H | -4.59318800 | -5.58684300 | 3.32666400  |
| H | -4.29283600 | -4.11841900 | 2.39465100  |
| C | -1.95900500 | -5.56336600 | 2.67496900  |
| H | -1.02572200 | -6.02356500 | 2.33976900  |
| H | -1.78301900 | -4.48506800 | 2.75420100  |
| H | -2.17560500 | -5.94173300 | 3.68149800  |
| C | -0.67006100 | -7.25445900 | -0.04686500 |
| H | -1.14467600 | -7.76498300 | 0.79724300  |
| H | -0.09552100 | -8.00165200 | -0.60799100 |
| H | 0.04816300  | -6.53061200 | 0.35806400  |
| C | -0.95142700 | -5.94229300 | -2.16037800 |
| H | -0.36762400 | -6.70471800 | -2.69056600 |
| H | -1.63138700 | -5.48155000 | -2.88181000 |
| H | -0.25740000 | -5.16400100 | -1.82251600 |
| C | -5.00478800 | -3.61524700 | -0.72049500 |
| H | -5.99586300 | -3.51113300 | -1.17876300 |
| H | -5.10501100 | -3.40299400 | 0.34853800  |
| H | -4.35629500 | -2.84431200 | -1.15282200 |
| C | -4.31294400 | -5.21872000 | -2.51297700 |
| H | -3.92466100 | -6.20888700 | -2.77331200 |
| H | -5.29715400 | -5.11189800 | -2.98499200 |
| H | -3.65407100 | -4.46857600 | -2.96561500 |
| C | -7.14399200 | 2.11042100  | 0.03748000  |
| C | -7.86891100 | 3.02687500  | -0.73317300 |
| C | -7.85874400 | 1.17506400  | 0.79317700  |
| C | -9.25779200 | 3.00032200  | -0.75203300 |
| H | -7.33746600 | 3.74845800  | -1.34788400 |
| C | -9.24817600 | 1.15440700  | 0.77239700  |
| H | -7.31692800 | 0.47185000  | 1.41965900  |
| C | -9.97222900 | 2.06700600  | 0.00264500  |
| H | -9.79938700 | 3.71320900  | -1.36934300 |
| H | -9.78233200 | 0.42110100  | 1.37179700  |
| C | 7.29163700  | -2.36411600 | 0.08668200  |
| C | 8.02117700  | -3.29032600 | -0.66783600 |
| C | 8.00184000  | -1.42157800 | 0.83763900  |

|   |              |             |             |
|---|--------------|-------------|-------------|
| C | 9.41015600   | -3.26613900 | -0.67591100 |
| H | 7.49346000   | -4.01814600 | -1.27838800 |
| C | 9.39147900   | -1.40326400 | 0.82766300  |
| H | 7.45625300   | -0.71101700 | 1.45241500  |
| C | 10.12011400  | -2.32546300 | 0.07394300  |
| H | 9.95546800   | -3.98692700 | -1.28062600 |
| H | 9.92204700   | -0.66420700 | 1.42316000  |
| C | 11.62716000  | -2.32744100 | 0.09040300  |
| H | 12.02269400  | -1.34103300 | 0.34731600  |
| H | 12.01006700  | -3.04005600 | 0.82967300  |
| H | 12.03374000  | -2.61559200 | -0.88326900 |
| C | -11.47936200 | 2.06656400  | 0.00731400  |
| H | -11.86915200 | 2.78128400  | 0.74092300  |
| H | -11.87883900 | 2.35025900  | -0.97057700 |
| H | -11.87527000 | 1.08048400  | 0.26498100  |

**Table S4.** Cartesian coordinates for all optimized geometries of **1c**.

The excitation energy of **1c** is 1.9997 eV.

|   |             |             |             |
|---|-------------|-------------|-------------|
| C | -1.35164000 | -0.27944000 | 0.00127600  |
| C | -0.49648300 | -1.40764100 | -0.01469300 |
| C | 0.90948400  | -1.25120100 | -0.00761400 |
| C | 1.48022200  | 0.07502600  | 0.00239100  |
| C | 0.62553700  | 1.20346500  | -0.00226100 |
| C | -0.78115100 | 1.04654800  | 0.00350000  |
| C | 1.77713100  | -2.36526100 | -0.00786400 |
| C | 2.88422100  | 0.21293200  | 0.01919400  |
| C | 3.72201900  | -0.88827600 | 0.02825600  |
| C | 3.15039800  | -2.21385300 | 0.00862500  |
| C | 4.04407100  | -3.33898300 | 0.01644300  |
| H | 3.61527400  | -4.33769200 | 0.01085900  |
| C | 5.38888800  | -3.16403300 | 0.04619000  |
| C | 5.97092100  | -1.84320800 | 0.07208600  |
| C | 5.14902200  | -0.75349100 | 0.05722500  |
| H | 1.34497700  | -3.36237400 | -0.01198100 |
| H | 3.30817900  | 1.21323700  | 0.03725200  |
| H | 6.04902200  | -4.02556400 | 0.08150800  |
| H | 5.56715300  | 0.25030900  | 0.04118600  |
| C | -5.84401100 | 1.63278200  | 0.06187500  |
| C | -5.02090200 | 0.54389100  | 0.04681300  |
| C | -3.59405600 | 0.68117700  | 0.02889900  |
| C | -3.02338100 | 2.00701000  | 0.02122600  |
| C | -3.91801400 | 3.13125800  | 0.03155800  |
| C | -5.26287300 | 2.95438100  | 0.05039400  |
| H | -3.17881900 | -1.41995200 | 0.02886400  |

|    |             |             |             |
|----|-------------|-------------|-------------|
| H  | -5.43659500 | -0.46095700 | 0.01918000  |
| C  | -2.75545300 | -0.41925700 | 0.01648100  |
| C  | -1.65000400 | 2.16003900  | 0.01197600  |
| H  | -3.48976500 | 4.13035000  | 0.03501800  |
| H  | -5.92411300 | 3.81501900  | 0.08673500  |
| H  | -1.22056500 | 3.15825300  | 0.01638600  |
| C  | -1.05961900 | -2.71650300 | -0.04060800 |
| C  | -1.54149500 | -3.83646700 | -0.06882400 |
| Si | -2.27614700 | -5.53217500 | -0.08483500 |
| C  | 1.17687900  | 2.51798600  | -0.01734500 |
| C  | 1.61563000  | 3.65554000  | -0.04066300 |
| Si | 2.17537200  | 5.41940900  | -0.05359600 |
| C  | -2.53581000 | -6.06476000 | 1.72623400  |
| H  | -2.58126800 | -7.16540400 | 1.70667600  |
| C  | -1.06256600 | -6.69497600 | -0.98048000 |
| H  | -1.67405500 | -7.54079000 | -1.33257100 |
| C  | -3.94581300 | -5.44547900 | -0.99856700 |
| H  | -4.54414600 | -6.26908300 | -0.57830200 |
| C  | 4.00823600  | 5.45022800  | -0.55703200 |
| H  | 4.58282600  | 5.20511800  | 0.34889700  |
| C  | 1.94208600  | 6.01603300  | 1.73423400  |
| H  | 2.41736100  | 5.22499200  | 2.33395000  |
| C  | 1.10614900  | 6.32525900  | -1.34396600 |
| H  | 1.60630100  | 6.14187100  | -2.30782300 |
| C  | 4.45388400  | 6.83438000  | -1.05171200 |
| H  | 4.28072600  | 7.62602100  | -0.31513600 |
| H  | 5.52410400  | 6.83198300  | -1.29048200 |
| H  | 3.91875000  | 7.10908700  | -1.96888500 |
| C  | 4.31895900  | 4.39525600  | -1.62660600 |
| H  | 3.74337300  | 4.58397100  | -2.54158500 |
| H  | 5.38068200  | 4.42012800  | -1.90044100 |
| H  | 4.07451500  | 3.38317300  | -1.29092500 |
| C  | 2.65740200  | 7.33389500  | 2.05642100  |
| H  | 2.50905600  | 7.60479900  | 3.10887400  |
| H  | 3.73643700  | 7.26236000  | 1.88384200  |
| H  | 2.27450400  | 8.16243300  | 1.45023300  |
| C  | 0.46236000  | 6.07245900  | 2.13379600  |
| H  | -0.04910500 | 5.12516600  | 1.92782600  |
| H  | 0.35516800  | 6.28510800  | 3.20430000  |
| H  | -0.06489400 | 6.86547400  | 1.59078600  |
| C  | -0.31718500 | 5.75985400  | -1.44679000 |
| H  | -0.85655100 | 5.87402400  | -0.49788100 |
| H  | -0.88982300 | 6.29431800  | -2.21464200 |
| H  | -0.31323800 | 4.69640900  | -1.70343900 |



|   |              |             |             |
|---|--------------|-------------|-------------|
| C | 1.05728000   | 7.84432300  | -1.12062100 |
| H | 2.05240000   | 8.29555600  | -1.05498500 |
| H | 0.52304200   | 8.33651800  | -1.94213400 |
| H | 0.52192700   | 8.08727100  | -0.19563700 |
| C | -3.85352000  | -5.54783800 | 2.31808600  |
| H | -4.72825600  | -5.85250100 | 1.73466500  |
| H | -3.98758700  | -5.92307900 | 3.33974200  |
| H | -3.84865100  | -4.45249200 | 2.37371600  |
| C | -1.37439900  | -5.64094900 | 2.63662200  |
| H | -0.40790400  | -6.02350500 | 2.29827400  |
| H | -1.30018600  | -4.54866400 | 2.67647600  |
| H | -1.53702600  | -6.00271200 | 3.65917200  |
| C | 0.02977000   | -7.25981700 | -0.06399100 |
| H | -0.38018300  | -7.79579300 | 0.79811100  |
| H | 0.67066700   | -7.95704200 | -0.61722400 |
| H | 0.67476700   | -6.45688700 | 0.31446600  |
| C | -0.40971000  | -6.02914000 | -2.19991700 |
| H | 0.24379600   | -6.73853300 | -2.72205700 |
| H | -1.14146800  | -5.65616900 | -2.92130500 |
| H | 0.20434400   | -5.17641300 | -1.88821500 |
| C | -4.68664600  | -4.12600500 | -0.73665500 |
| H | -5.68596900  | -4.14747600 | -1.18823500 |
| H | -4.80507600  | -3.90859400 | 0.32942500  |
| H | -4.13595000  | -3.29250900 | -1.18852400 |
| C | -3.83891800  | -5.67066100 | -2.51191600 |
| H | -3.34483900  | -6.61450500 | -2.76395500 |
| H | -4.83614900  | -5.68492100 | -2.96828600 |
| H | -3.27730800  | -4.85814400 | -2.98753200 |
| C | -7.31763600  | 1.47752200  | 0.08352600  |
| C | -8.13639700  | 2.37104700  | -0.61662700 |
| C | -7.90813400  | 0.43100300  | 0.80162000  |
| C | -9.51046000  | 2.20449100  | -0.59888900 |
| H | -7.72176300  | 3.18184500  | -1.20552200 |
| C | -9.28390300  | 0.28460400  | 0.80025900  |
| H | -7.31260500  | -0.25809300 | 1.38982500  |
| C | -10.10293400 | 1.16418600  | 0.10462100  |
| C | 7.44432700   | -1.68980200 | 0.11167100  |
| C | 8.27023500   | -2.57549100 | -0.59005300 |
| C | 8.02734400   | -0.65411400 | 0.85113800  |
| C | 9.64425900   | -2.41181500 | -0.55252600 |
| H | 7.86172600   | -3.37761900 | -1.19490700 |
| C | 9.40329600   | -0.51065900 | 0.86965300  |
| H | 7.42546600   | 0.02739400  | 1.44170600  |
| C | 10.22951800  | -1.38259400 | 0.17292800  |

|   |              |             |             |
|---|--------------|-------------|-------------|
| F | 11.55203900  | -1.23927300 | 0.20605000  |
| F | 10.44382300  | -3.24257500 | -1.22363400 |
| F | 9.97323300   | 0.46451900  | 1.57970800  |
| F | -9.86079800  | -0.70214500 | 1.48840700  |
| F | -11.42546700 | 1.01722900  | 0.11742400  |
| F | -10.30286800 | 3.04278600  | -1.26920900 |

**Table S5.** Cartesian coordinates for all optimized geometries of **1d**.

The excitation energy of **1d** is 2.0007 eV.

|    |             |             |            |
|----|-------------|-------------|------------|
| C  | -1.33489100 | -0.38292100 | 0.20531900 |
| C  | -0.39632800 | -1.44322500 | 0.21100500 |
| C  | 0.99404900  | -1.18259300 | 0.22251500 |
| C  | 1.46296400  | 0.18253100  | 0.21518100 |
| C  | 0.52506400  | 1.24286400  | 0.20458900 |
| C  | -0.86599800 | 0.98206000  | 0.20494400 |
| C  | 1.94342900  | -2.22775200 | 0.23380700 |
| C  | 2.85304300  | 0.42520500  | 0.21230100 |
| C  | 3.77239400  | -0.60891800 | 0.21446900 |
| C  | 3.30152200  | -1.97365000 | 0.22649200 |
| C  | 4.27814500  | -3.02785600 | 0.23272600 |
| H  | 3.92610300  | -4.05579500 | 0.26220200 |
| C  | 5.60529500  | -2.75025500 | 0.21330400 |
| C  | 6.09035800  | -1.39008100 | 0.18714900 |
| C  | 5.18605500  | -0.36672400 | 0.19413200 |
| H  | 1.58720000  | -3.25430400 | 0.25107900 |
| H  | 3.20086500  | 1.45453700  | 0.21223200 |
| H  | 6.33024300  | -3.55804900 | 0.24612500 |
| H  | 5.52433100  | 0.66579500  | 0.14836000 |
| C  | -5.96214800 | 1.18661600  | 0.13373300 |
| C  | -5.05723300 | 0.16388500  | 0.15427200 |
| C  | -3.64404800 | 0.40765200  | 0.17996200 |
| C  | -3.17373300 | 1.77240300  | 0.18108400 |
| C  | -4.15073300 | 2.82612400  | 0.16896600 |
| C  | -5.47767600 | 2.54730200  | 0.14665900 |
| H  | -3.07363400 | -1.65567100 | 0.20188700 |
| H  | -5.39362900 | -0.86980700 | 0.11680100 |
| C  | -2.72485300 | -0.62656000 | 0.19466300 |
| C  | -1.81568600 | 2.02739000  | 0.19727100 |
| H  | -3.79894300 | 3.85451700  | 0.18752700 |
| H  | -6.20305000 | 3.35512100  | 0.16688900 |
| H  | -1.46088400 | 3.05464900  | 0.20409400 |
| C  | -0.86470300 | -2.78912500 | 0.18893900 |
| C  | -1.28130900 | -3.93498400 | 0.15921000 |
| Si | -1.96382100 | -5.64951100 | 0.10345000 |

|    |             |             |             |
|----|-------------|-------------|-------------|
| C  | 0.98253600  | 2.59288700  | 0.18230100  |
| C  | 1.35857300  | 3.75268000  | 0.15506200  |
| Si | 1.86748200  | 5.52960100  | 0.13647900  |
| C  | -2.52629000 | -6.11515700 | 1.86448100  |
| H  | -2.53137100 | -7.21645400 | 1.88854300  |
| C  | -0.58887600 | -6.81724700 | -0.50978200 |
| H  | -1.11057000 | -7.69832300 | -0.91552400 |
| C  | -3.45102100 | -5.64297300 | -1.09075600 |
| H  | -4.09646200 | -6.47057000 | -0.75713100 |
| C  | 3.69877600  | 5.60421000  | -0.37096700 |
| H  | 4.27958000  | 5.37216600  | 0.53458600  |
| C  | 1.62806600  | 6.12690200  | 1.92367600  |
| H  | 2.12246000  | 5.34743700  | 2.52304300  |
| C  | 0.77466800  | 6.40882300  | -1.15204500 |
| H  | 1.27577400  | 6.23480400  | -2.11720200 |
| C  | 4.11226000  | 6.99778800  | -0.86624500 |
| H  | 3.92098200  | 7.78584900  | -0.13033600 |
| H  | 5.18219200  | 7.01981200  | -1.10584100 |
| H  | 3.57052400  | 7.25943400  | -1.78336300 |
| C  | 4.03360700  | 4.55706800  | -1.44089600 |
| H  | 3.45209100  | 4.73163200  | -2.35499200 |
| H  | 5.09406600  | 4.60764300  | -1.71646600 |
| H  | 3.81433700  | 3.53921700  | -1.10547100 |
| C  | 2.31558200  | 7.46049300  | 2.24102400  |
| H  | 2.16625600  | 7.72963700  | 3.29389000  |
| H  | 3.39512700  | 7.41288000  | 2.06330000  |
| H  | 1.91141600  | 8.27954600  | 1.63564000  |
| C  | 0.14900800  | 6.15194300  | 2.32892700  |
| H  | -0.34201000 | 5.19300700  | 2.12791300  |
| H  | 0.04128100  | 6.36583600  | 3.39920000  |
| H  | -0.39788200 | 6.93124000  | 1.78535600  |
| C  | -0.63535700 | 5.80953100  | -1.24813800 |
| H  | -1.17577400 | 5.91761300  | -0.29937000 |
| H  | -1.22147300 | 6.32498300  | -2.01887300 |
| H  | -0.60705700 | 4.74457600  | -1.49687800 |
| C  | 0.69084400  | 7.92677700  | -0.93238200 |
| H  | 1.67530200  | 8.40186300  | -0.87371100 |
| H  | 0.14016200  | 8.40413900  | -1.75194600 |
| H  | 0.15544300  | 8.15930100  | -0.00478300 |
| C  | -3.94453300 | -5.63028900 | 2.19111800  |
| H  | -4.69068200 | -5.99280700 | 1.47673900  |
| H  | -4.24543900 | -5.97057000 | 3.18943700  |
| H  | -3.98724400 | -4.53425100 | 2.19746800  |
| C  | -1.56017200 | -5.60654900 | 2.94368200  |

|   |              |             |             |
|---|--------------|-------------|-------------|
| H | -0.53385600  | -5.95071700 | 2.79201200  |
| H | -1.54105000  | -4.51127300 | 2.95001600  |
| H | -1.88245300  | -5.94186000 | 3.93701300  |
| C | 0.34137500   | -7.29933800 | 0.61038100  |
| H | -0.19902000  | -7.80352600 | 1.41788400  |
| H | 1.08386300   | -8.00313800 | 0.21502000  |
| H | 0.89255400   | -6.45800700 | 1.04868200  |
| C | 0.25004000   | -6.19183400 | -1.63262800 |
| H | 1.00403100   | -6.90310100 | -1.99170200 |
| H | -0.35178400  | -5.88318400 | -2.49114300 |
| H | 0.77715000   | -5.30250400 | -1.26825400 |
| C | -4.25365800  | -4.33670500 | -1.00577800 |
| H | -5.15504000  | -4.39320500 | -1.62809000 |
| H | -4.56672100  | -4.09843900 | 0.01553900  |
| H | -3.64906700  | -3.49843700 | -1.37114900 |
| C | -3.06930600  | -5.90766900 | -2.55225600 |
| H | -2.52954900  | -6.85154300 | -2.68148600 |
| H | -3.96672200  | -5.94848100 | -3.18139400 |
| H | -2.43762200  | -5.10052900 | -2.94117600 |
| C | -7.42026600  | 0.92861100  | 0.08314000  |
| C | -8.26399500  | 1.76164800  | -0.61926700 |
| C | -7.97722100  | -0.19758800 | 0.75474200  |
| C | -9.65830700  | 1.51798700  | -0.69330400 |
| H | -7.86100200  | 2.61533700  | -1.15950300 |
| C | -9.31944200  | -0.45828000 | 0.70158700  |
| H | -7.32260400  | -0.83707600 | 1.33949400  |
| C | -10.53132500 | 2.36858700  | -1.42204200 |
| C | -10.20056300 | 0.38721500  | -0.02334600 |
| H | -9.73293800  | -1.31532500 | 1.22726400  |
| C | -11.87654000 | 2.10983400  | -1.47678100 |
| H | -10.11163000 | 3.23025200  | -1.93499300 |
| C | -11.59628900 | 0.14515400  | -0.09644700 |
| C | -12.41614100 | 0.98552400  | -0.80547500 |
| H | -12.53486600 | 2.76653700  | -2.03713000 |
| H | -12.00420100 | -0.72025400 | 0.41972900  |
| H | -13.48304100 | 0.79164700  | -0.85651400 |
| C | 7.54867900   | -1.13345500 | 0.13623900  |
| C | 8.39144700   | -1.97135000 | -0.56148700 |
| C | 8.10641300   | -0.00340700 | 0.80050900  |
| C | 9.78569900   | -1.72840800 | -0.63861100 |
| H | 7.98739900   | -2.82820800 | -1.09590600 |
| C | 9.44873200   | 0.25642200  | 0.74463700  |
| H | 7.45226000   | 0.63973100  | 1.38181200  |
| C | 10.65763000  | -2.58329700 | -1.36362200 |

|   |             |             |             |
|---|-------------|-------------|-------------|
| C | 10.32885300 | -0.59362900 | 0.02381000  |
| H | 9.86308600  | 1.11648200  | 1.26467000  |
| C | 12.00270100 | -2.32468200 | -1.42210000 |
| H | 10.23719100 | -3.44796200 | -1.87085600 |
| C | 11.72447700 | -0.35196000 | -0.05283900 |
| C | 12.54324400 | -1.19639500 | -0.75827500 |
| H | 12.66022400 | -2.98452700 | -1.97970300 |
| H | 12.13317200 | 0.51654500  | 0.45745500  |
| H | 13.61002800 | -1.00268200 | -0.81227700 |

## 4. Identification and Testing Spectra of Compounds

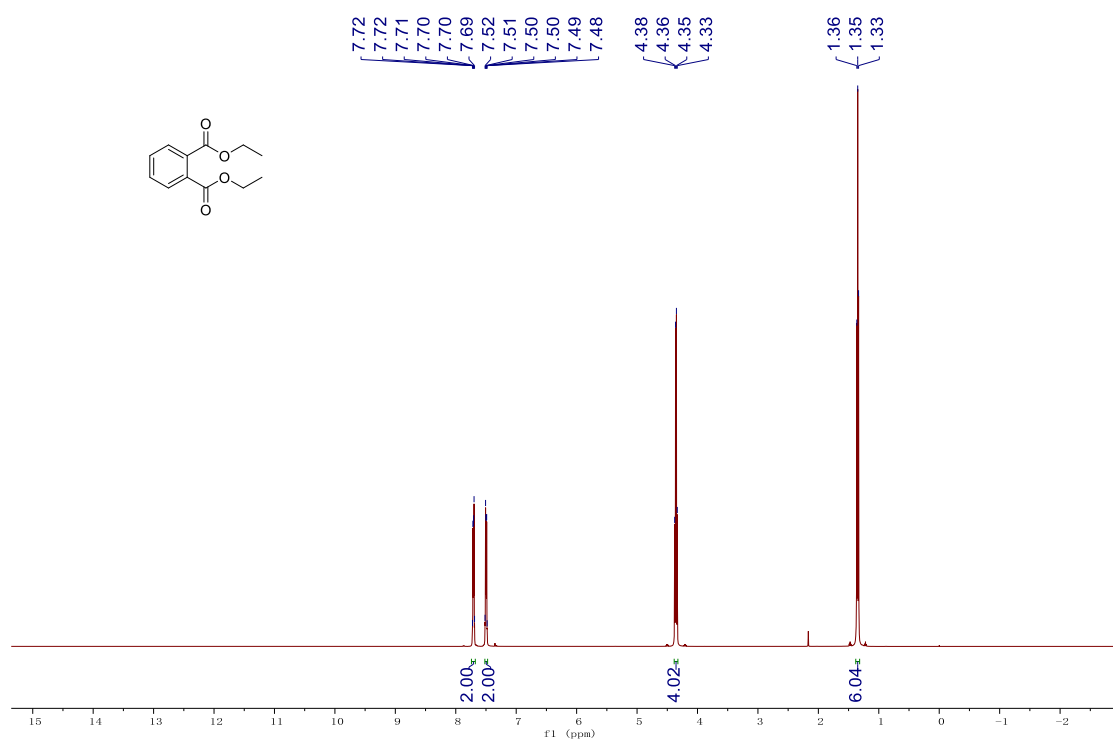

**Fig. S2.** <sup>1</sup>H NMR spectrum of compound S3.

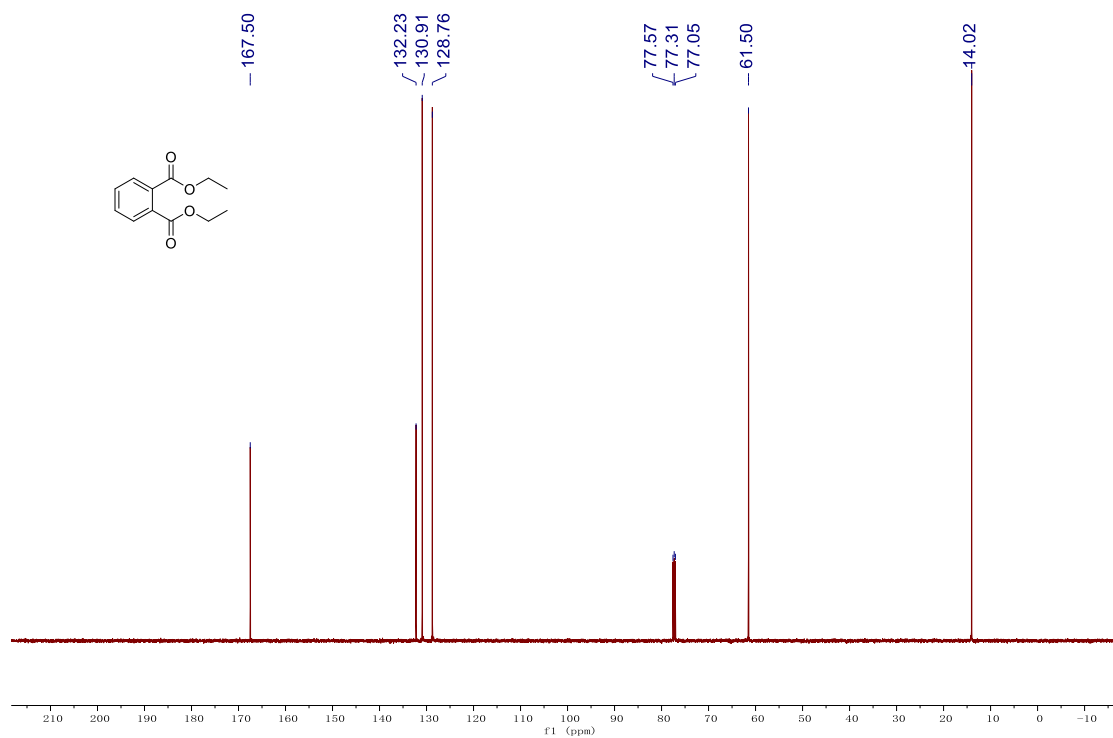

**Fig. S3.**  $^{13}\text{C}$  NMR spectrum of compound S3.

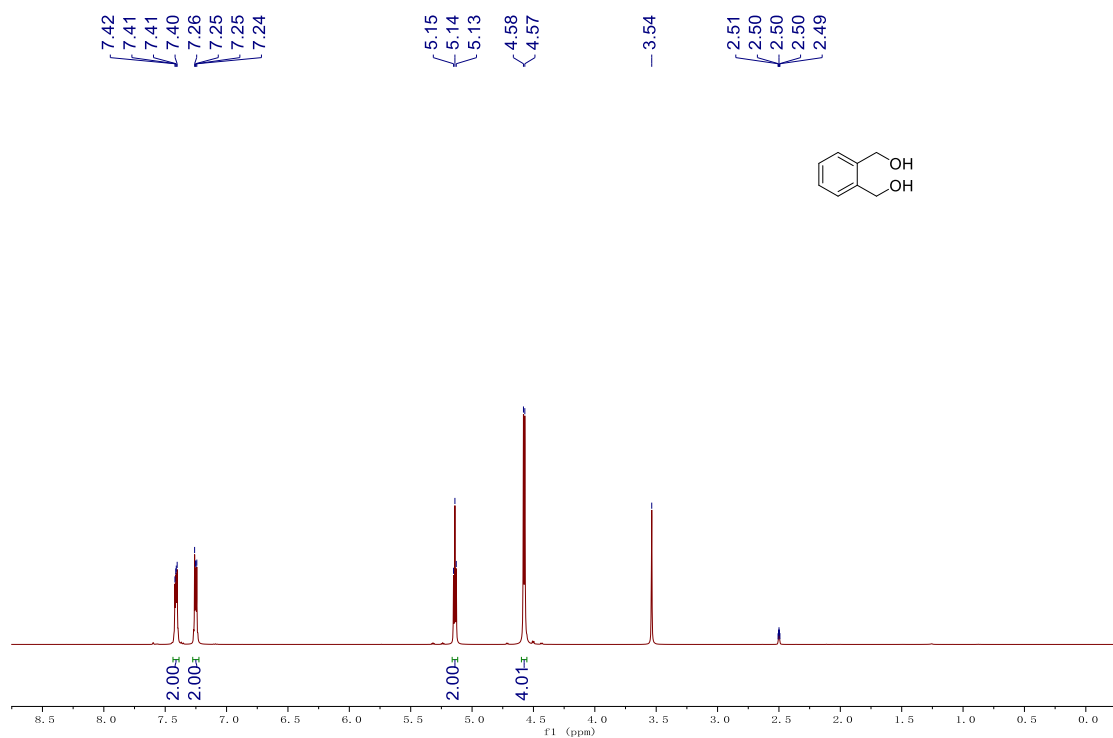

**Fig. S4.**  $^1\text{H}$  NMR spectrum of compound S4.

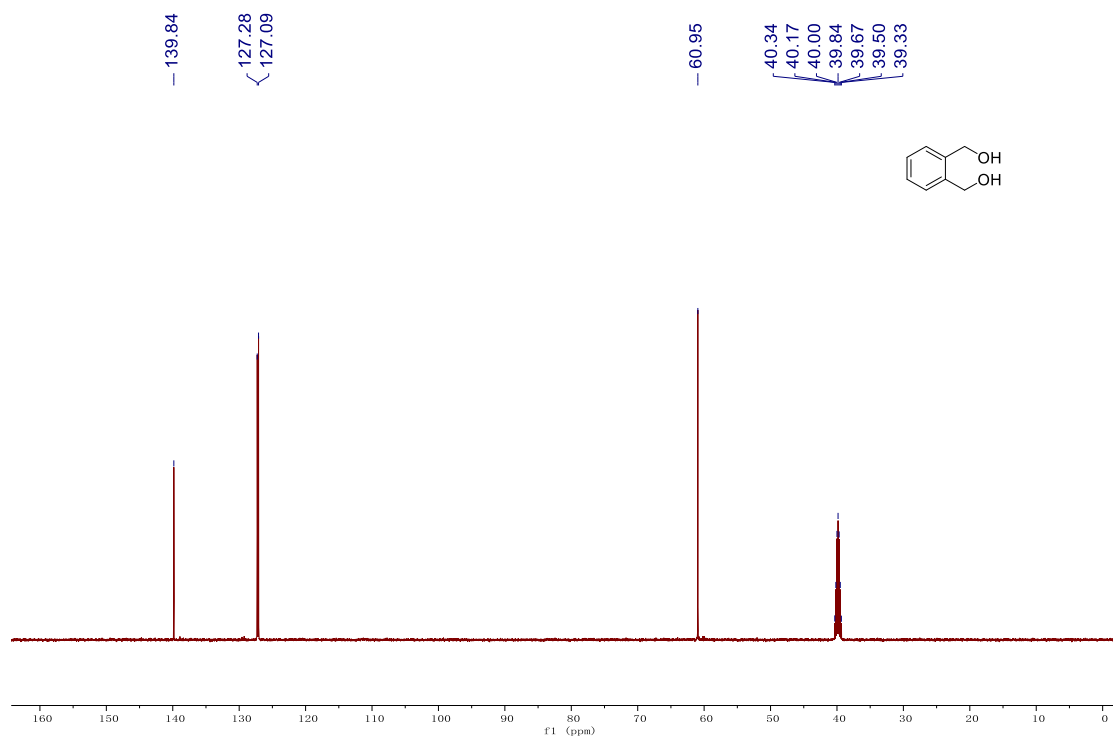

Fig. S5. <sup>13</sup>C NMR spectrum of compound S4.

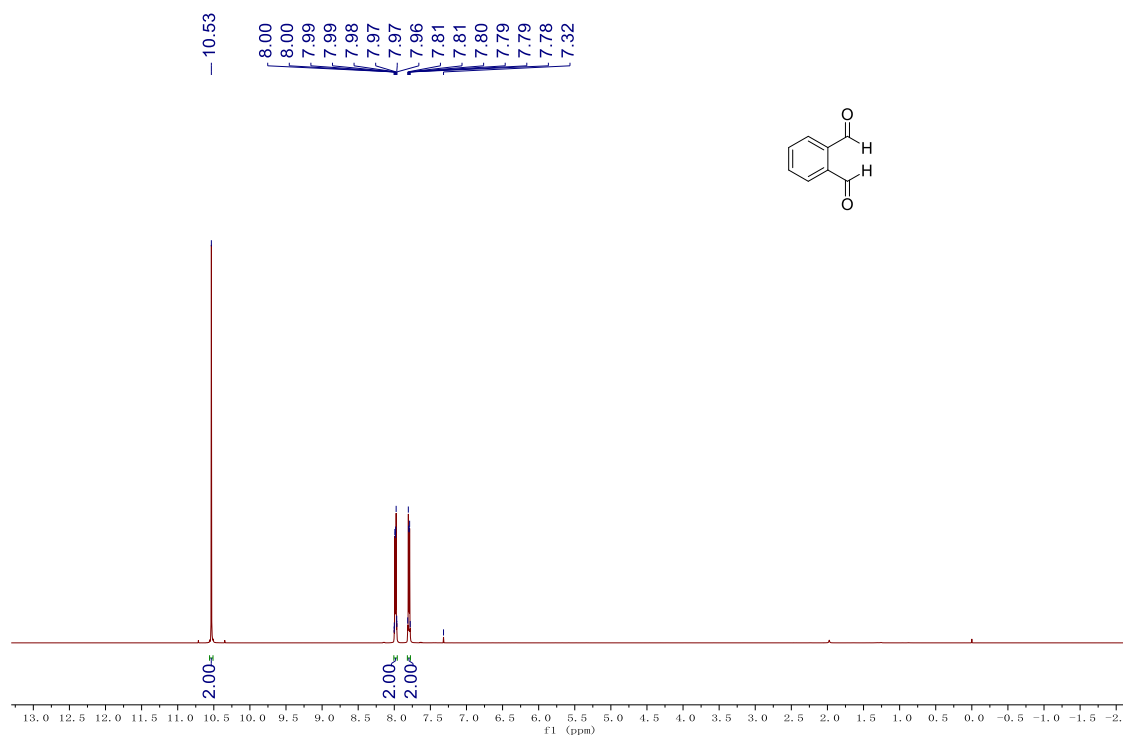

Fig. S6. <sup>1</sup>H NMR spectrum of compound S5.

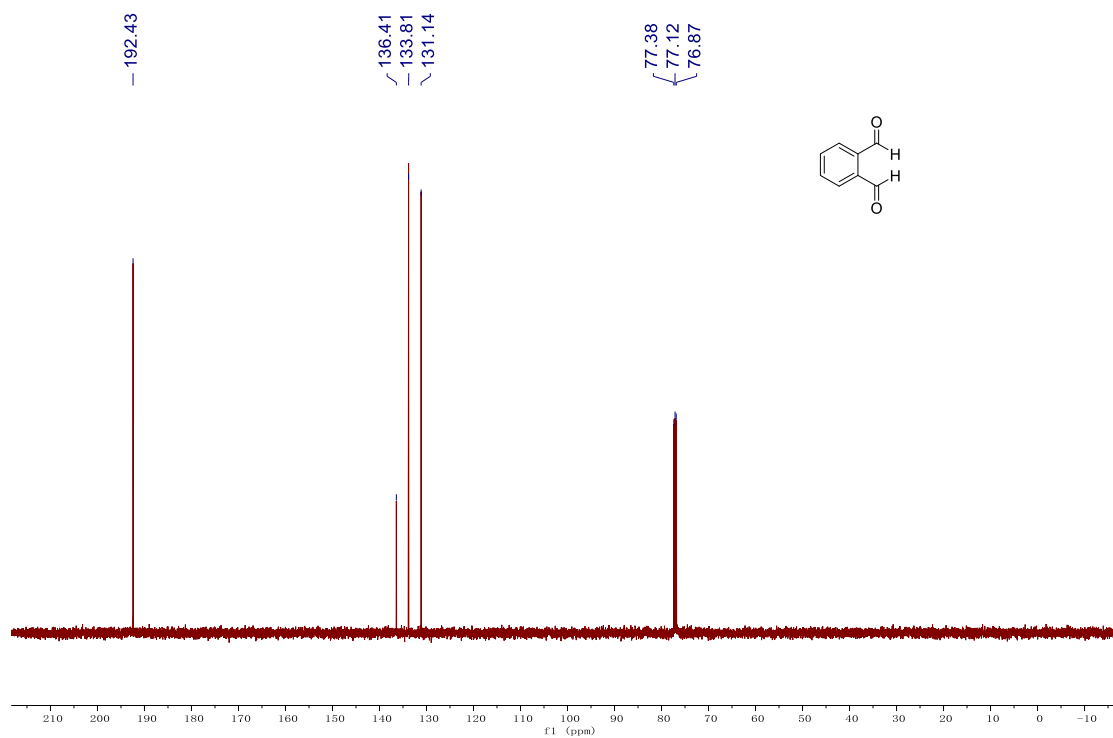

**Fig. S7.**  $^{13}\text{C}$  NMR spectrum of compound S5.

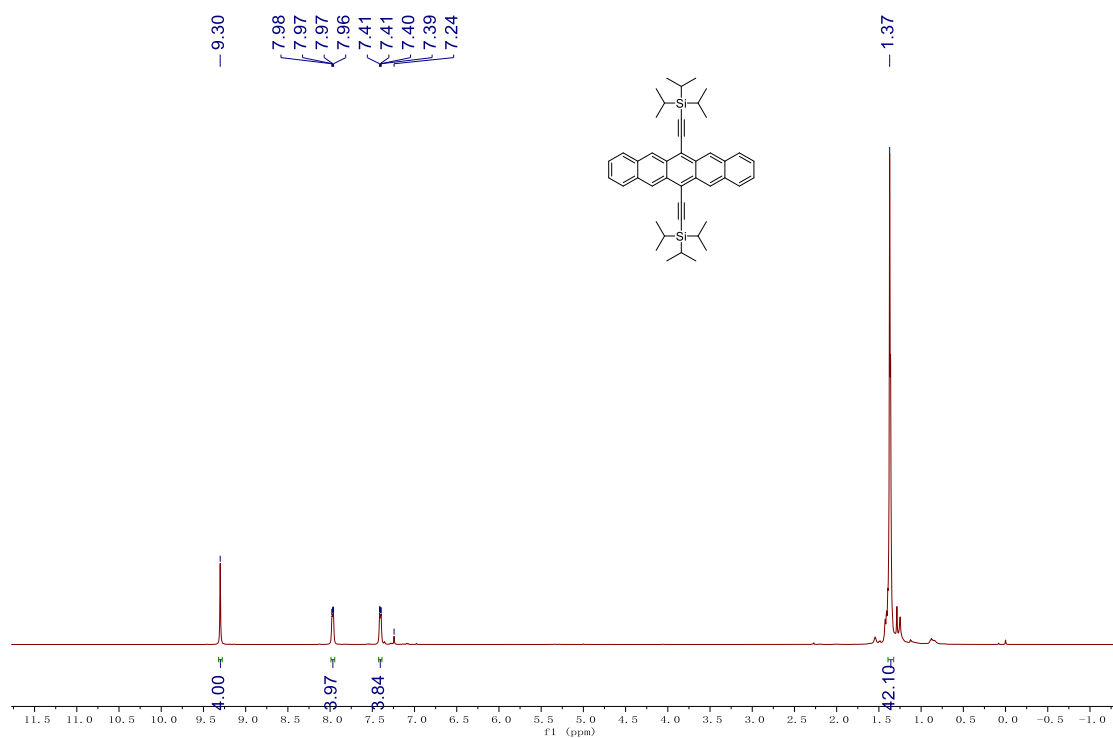

**Fig. S8.**  $^1\text{H}$  NMR spectrum of compound S1.



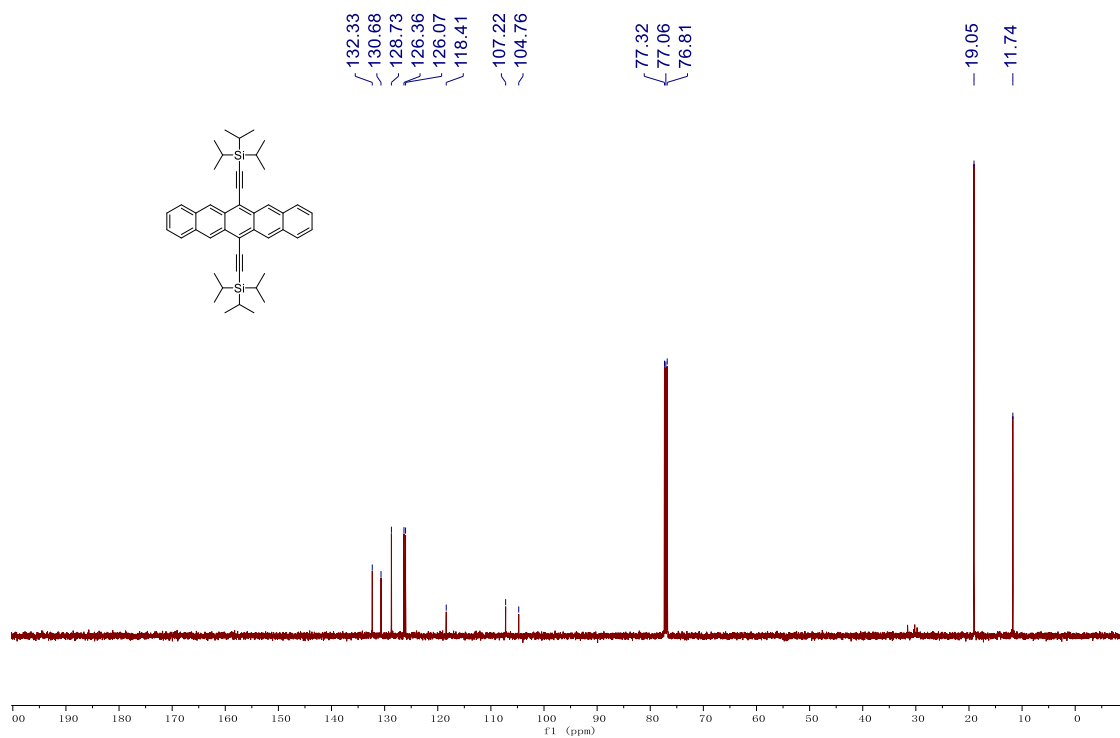

**Fig. S9.**  $^{13}\text{C}$  NMR spectrum of compound **S1**.

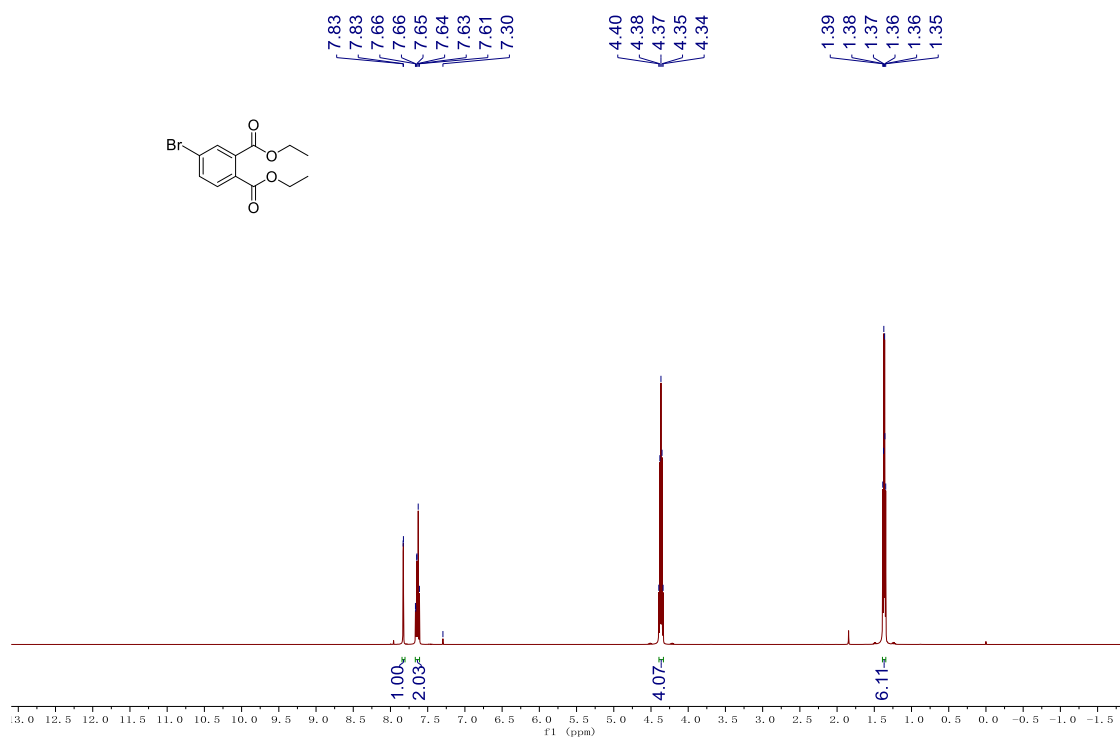

**Fig. S10.**  $^1\text{H}$  NMR spectrum of compound **3**.

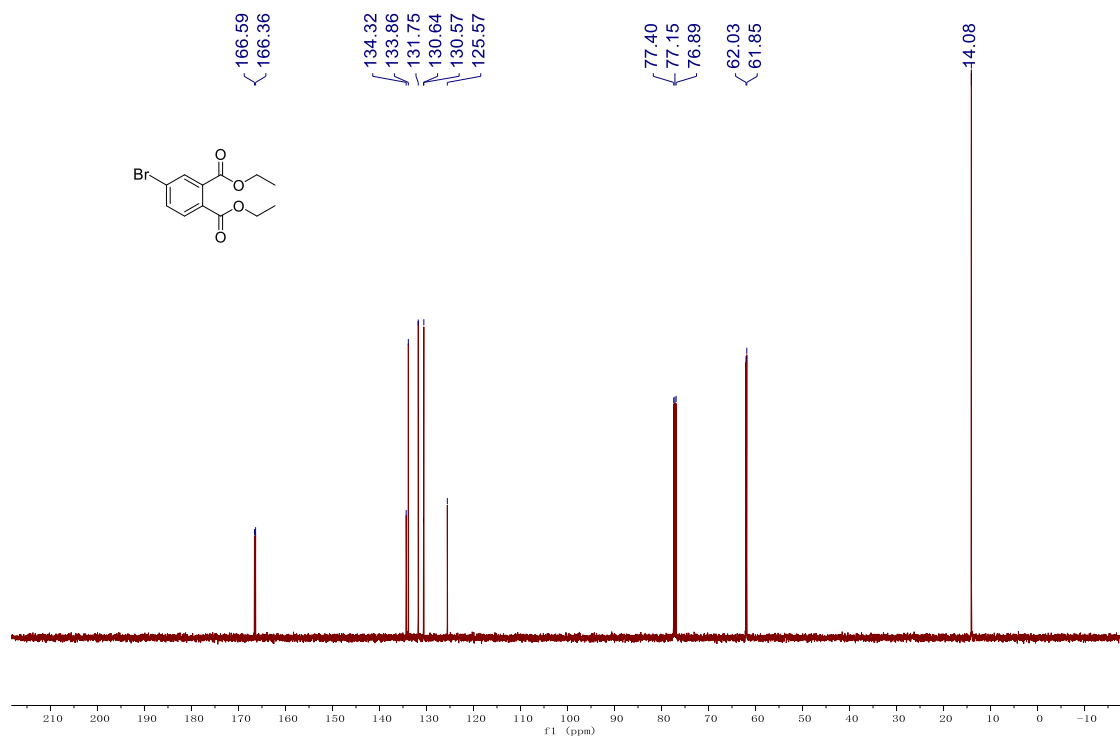

**Fig. S11.**  $^{13}\text{C}$  NMR spectrum of compound **3**.

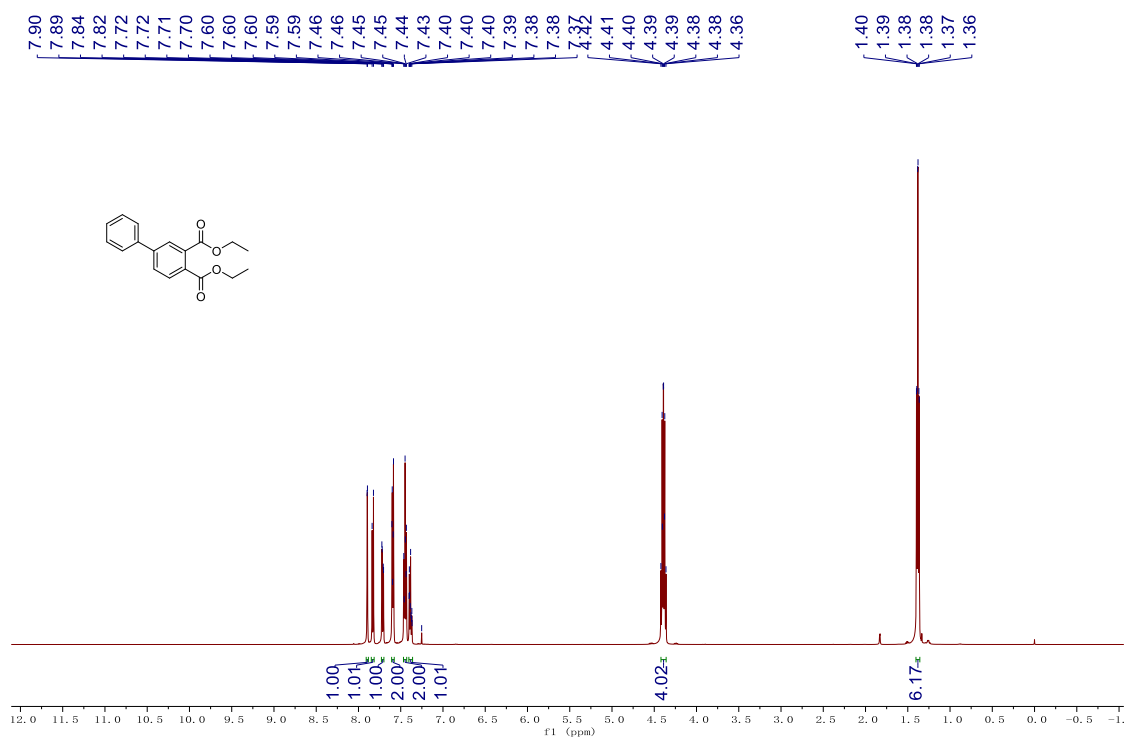

**Fig. S12.**  $^1\text{H}$  NMR spectrum of compound **4a**.

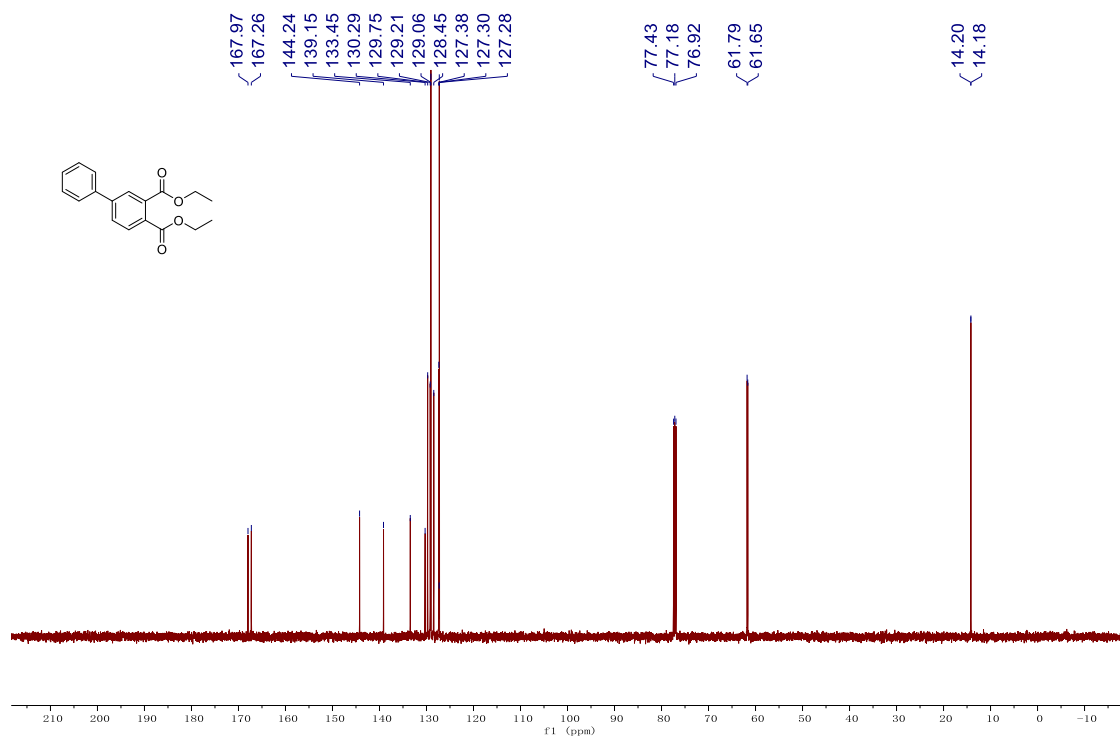

**Fig. S13.** <sup>13</sup>C NMR spectrum of compound **4a**.

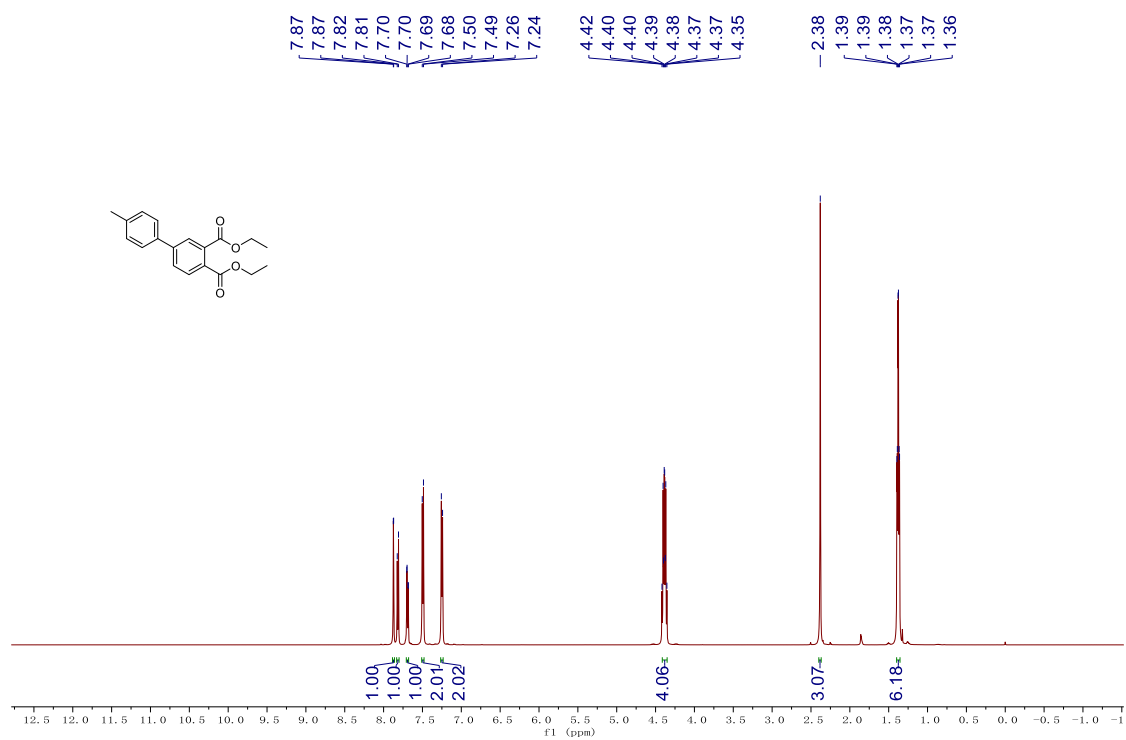

**Fig. S14.** <sup>1</sup>H NMR spectrum of compound **4b**.

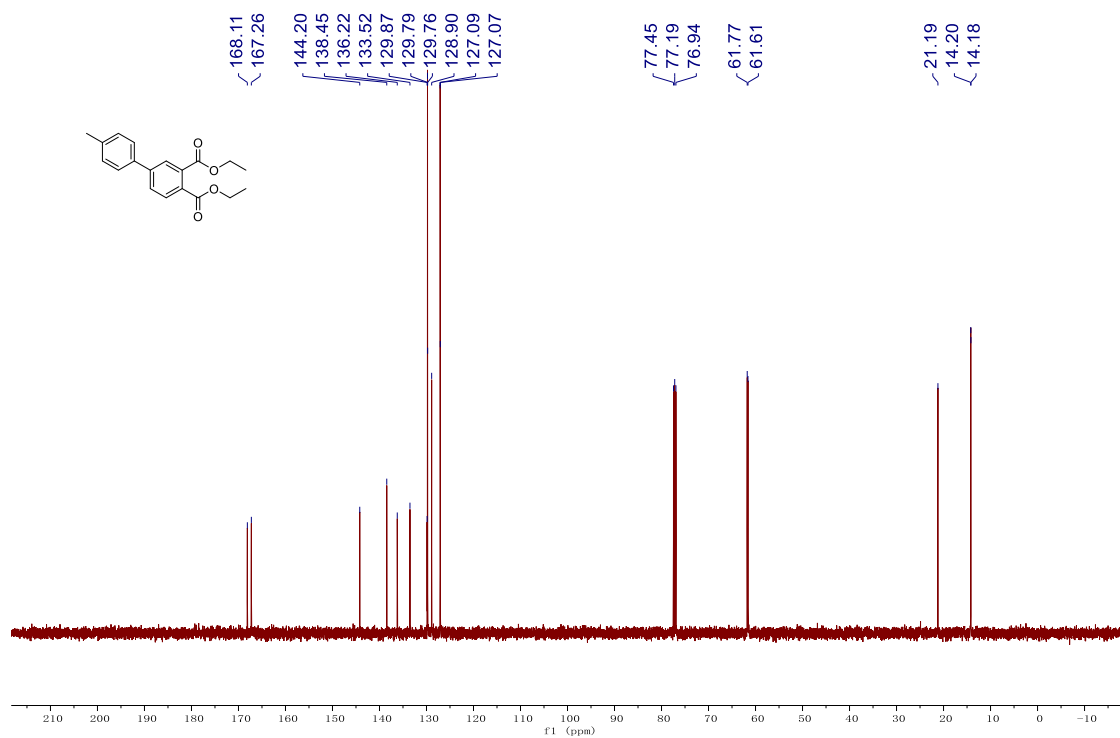

**Fig. S15.** <sup>13</sup>C NMR spectrum of compound **4b**.

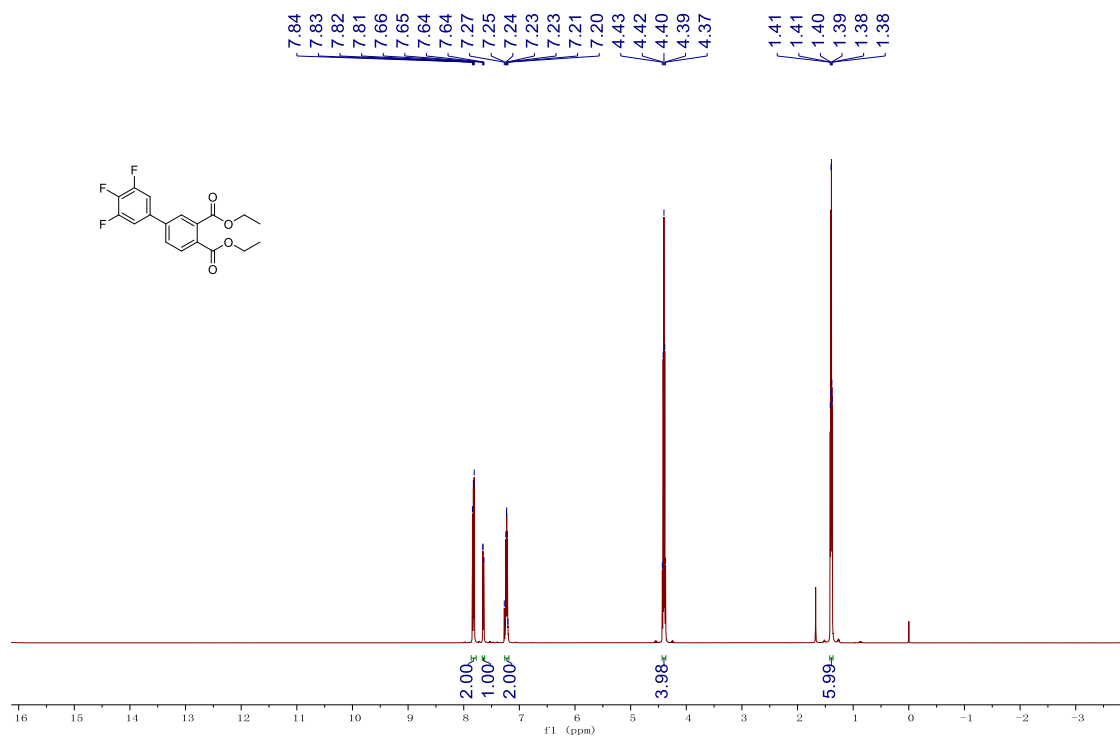

**Fig. S16.** <sup>1</sup>H NMR spectrum of compound **4c**.

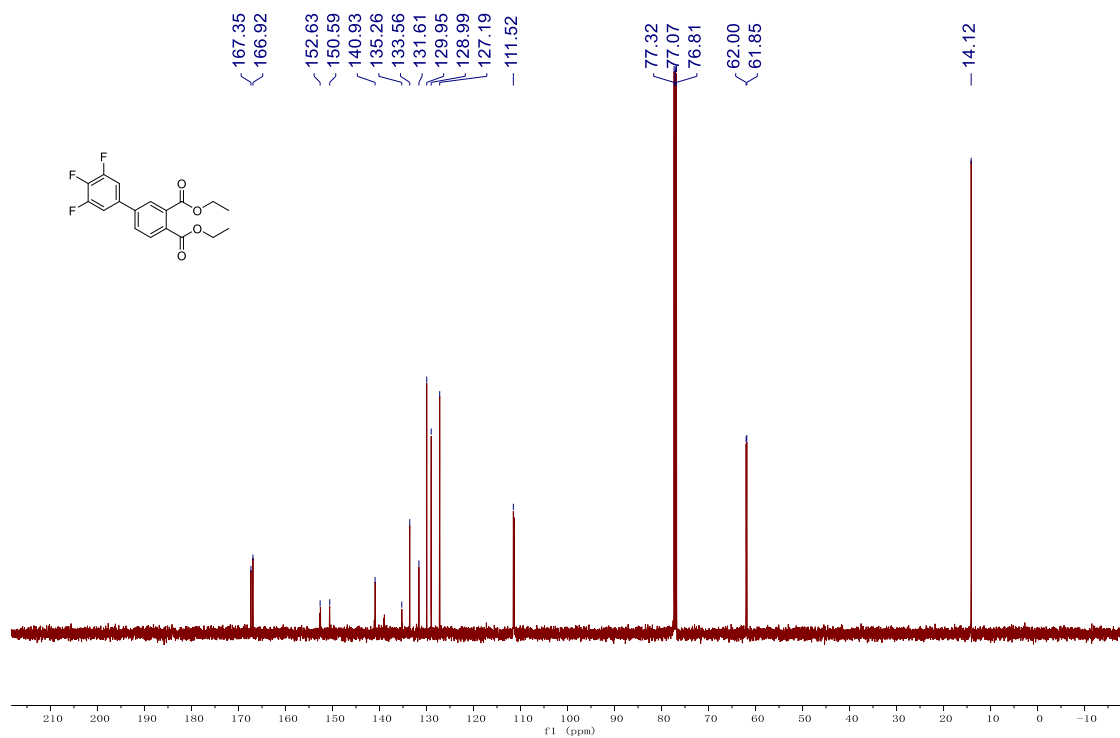

Fig. S17. <sup>13</sup>C NMR spectrum of compound 4c.

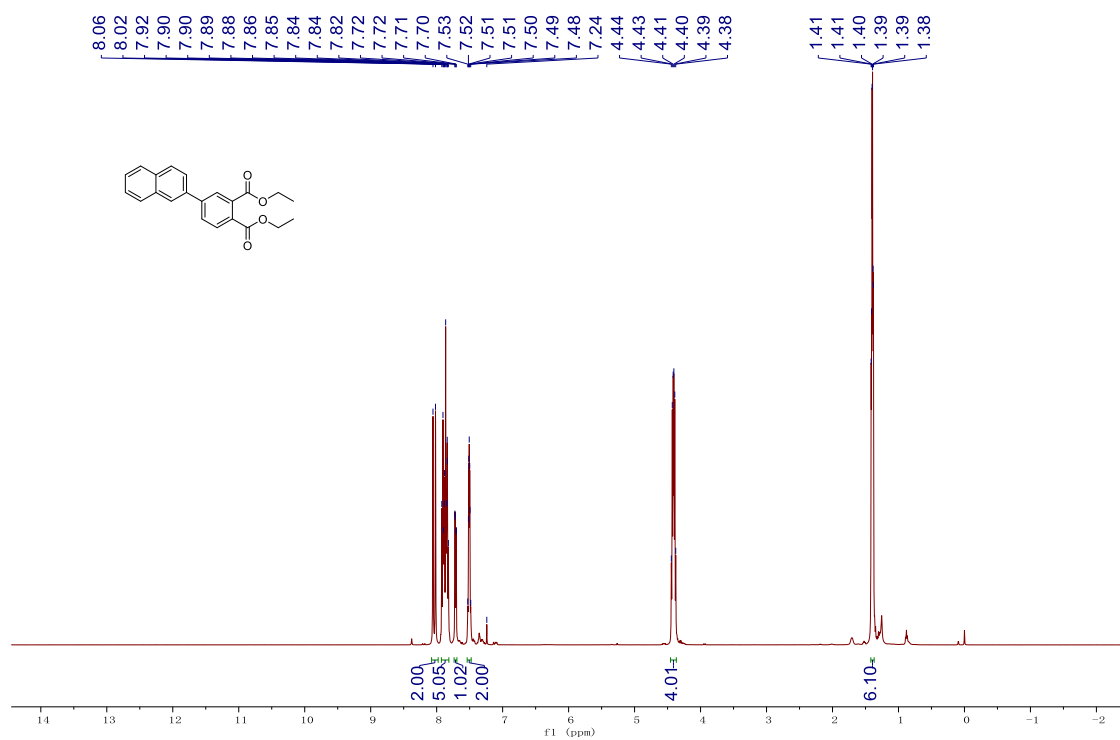

Fig. S18. <sup>1</sup>H NMR spectrum of compound 4d.

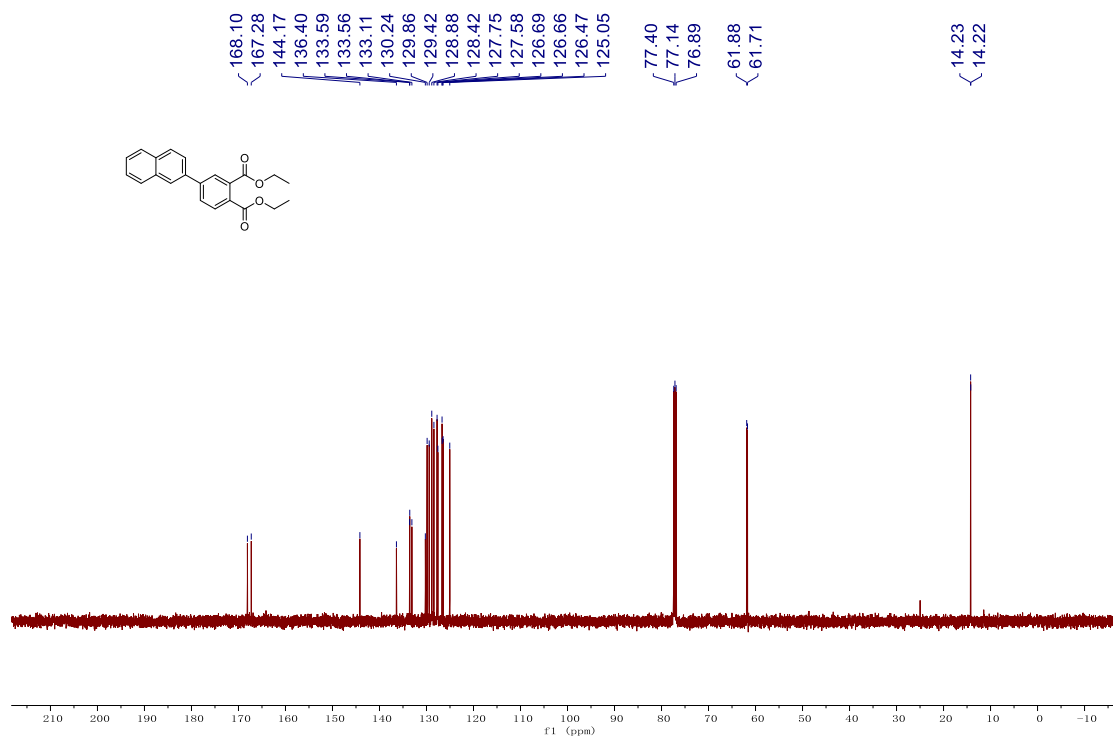

**Fig. S19.** <sup>13</sup>C NMR spectrum of compound 4d.

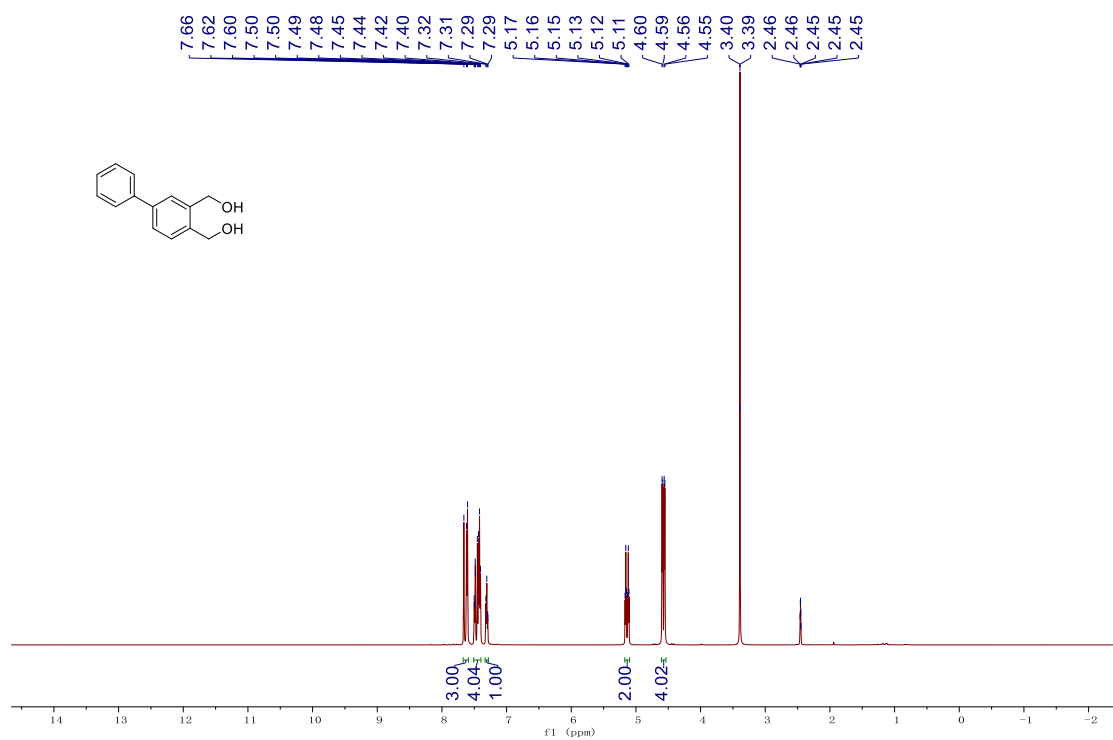

**Fig. S20.** <sup>1</sup>H NMR spectrum of compound 5a.

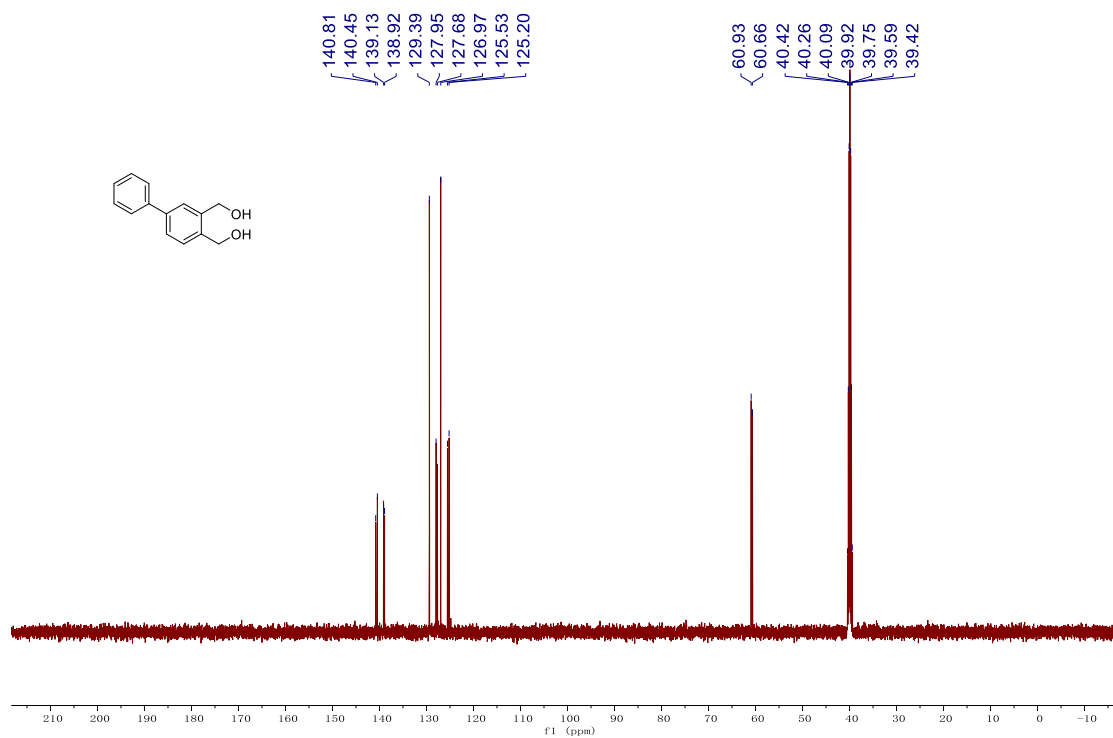

**Fig. S21.** <sup>13</sup>C NMR spectrum of compound **5a**.

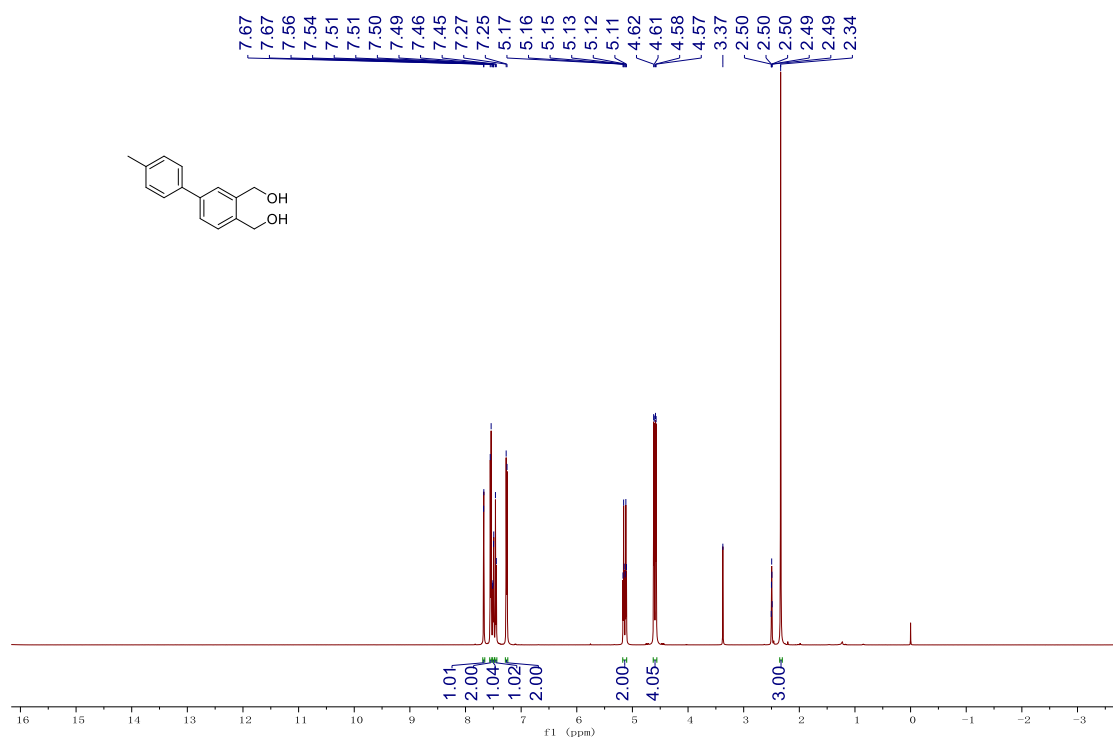

**Fig. S22.** <sup>1</sup>H NMR spectrum of compound **5b**.

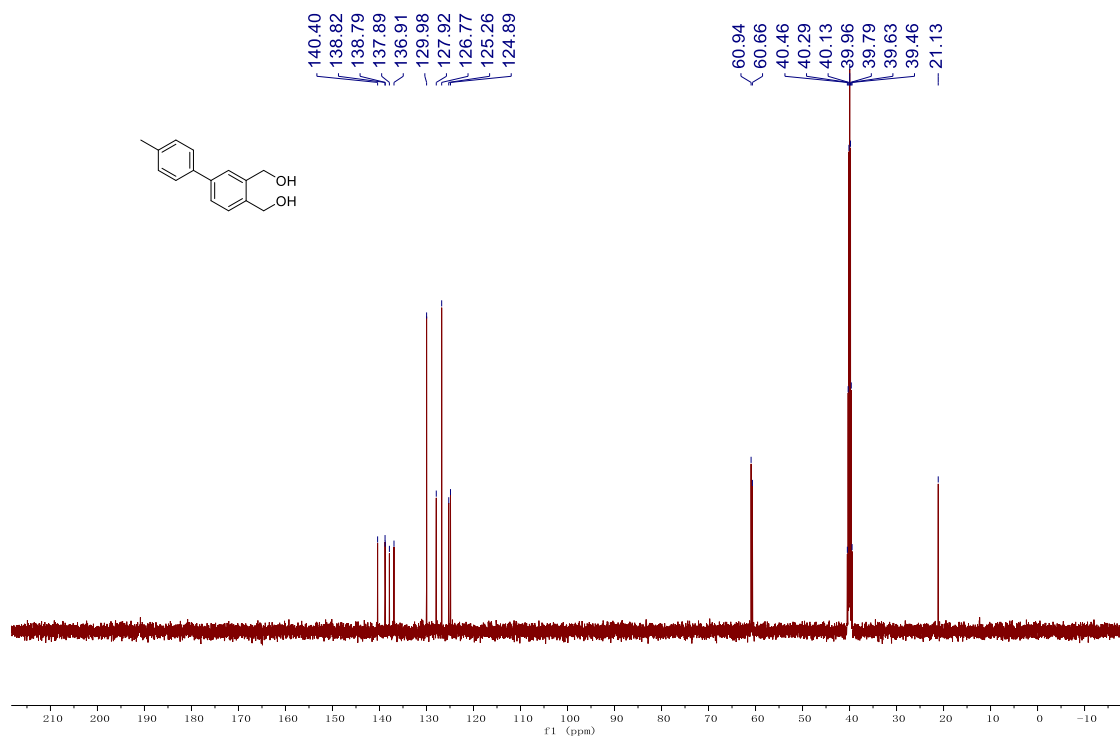

**Fig. S23.**  $^{13}\text{C}$  NMR spectrum of compound **5b**.

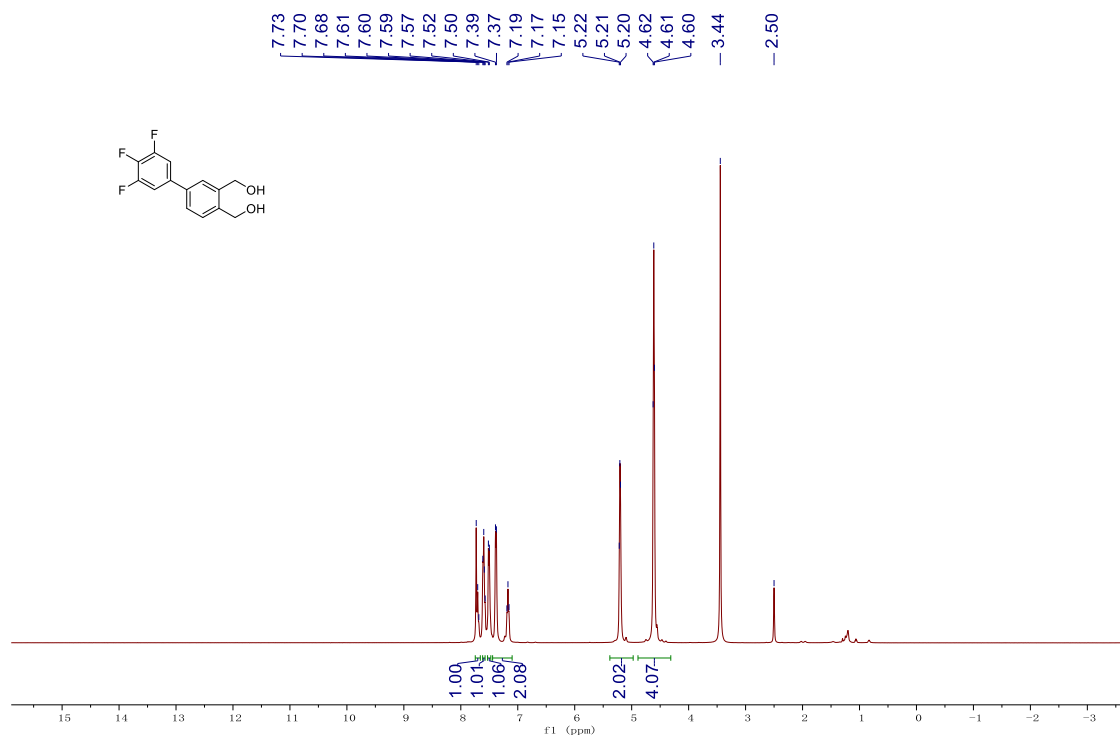

**Fig. S24.**  $^1\text{H}$  NMR spectrum of compound **5c**.



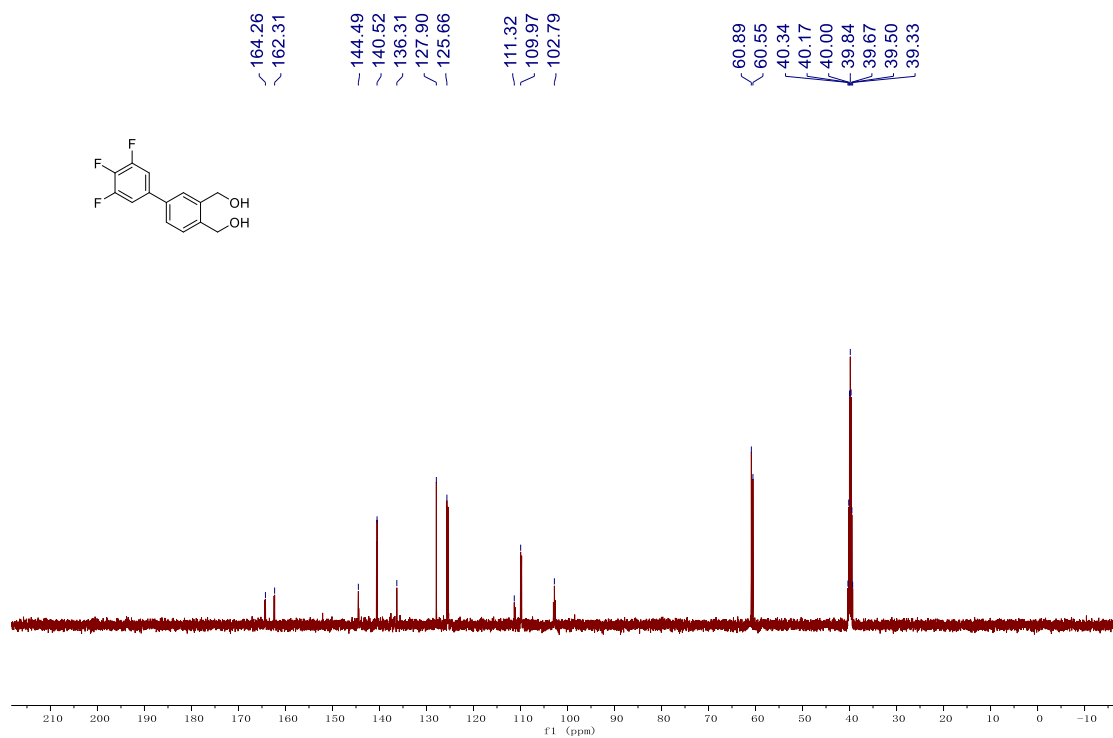

**Fig. S25.** <sup>13</sup>C NMR spectrum of compound **5c**.

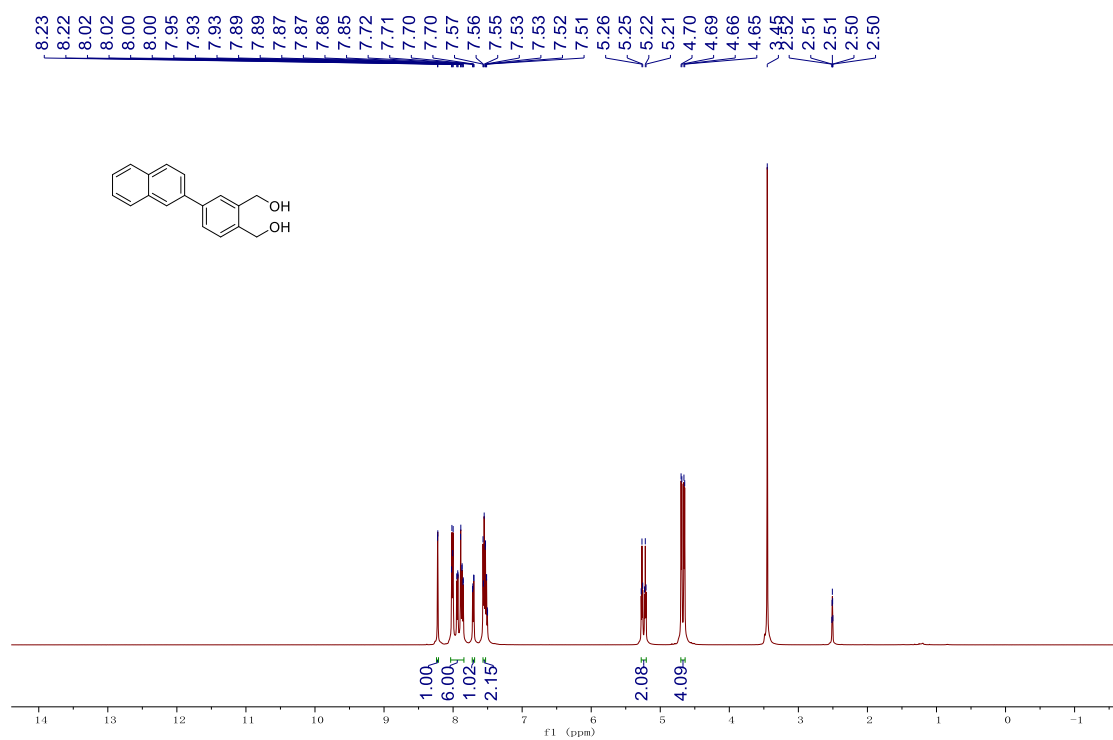

**Fig. S26.** <sup>1</sup>H NMR spectrum of compound **5d**.

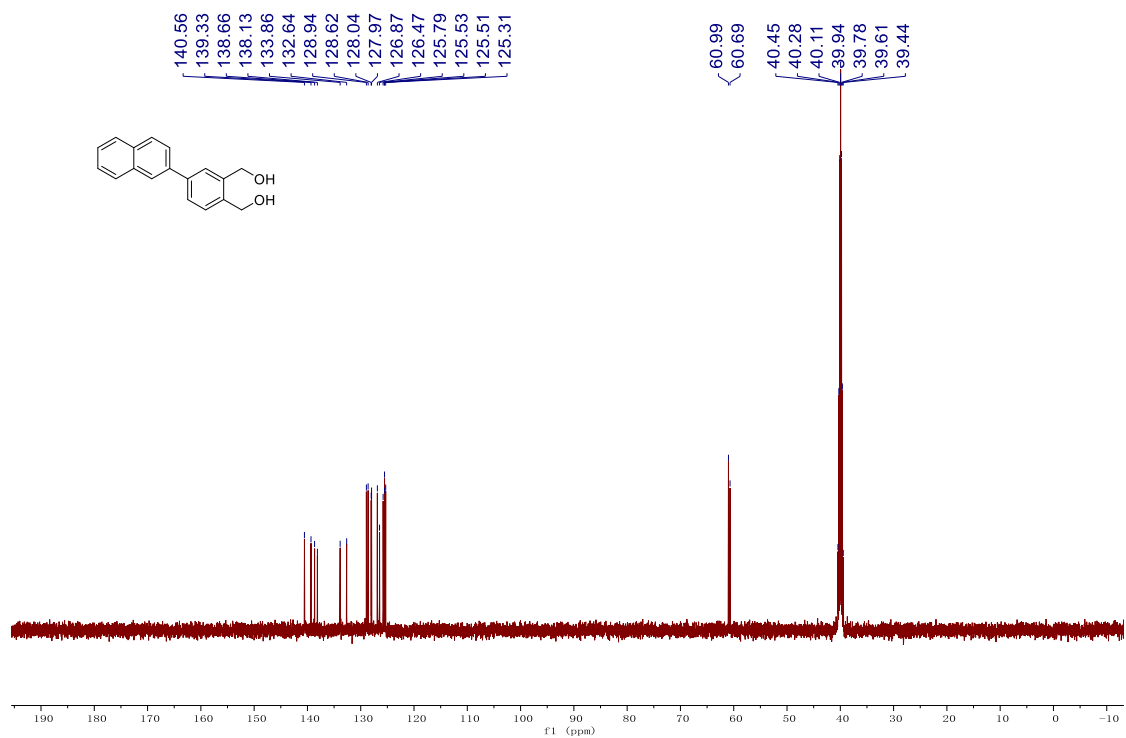

**Fig. S27.** <sup>13</sup>C NMR spectrum of compound **5d**.

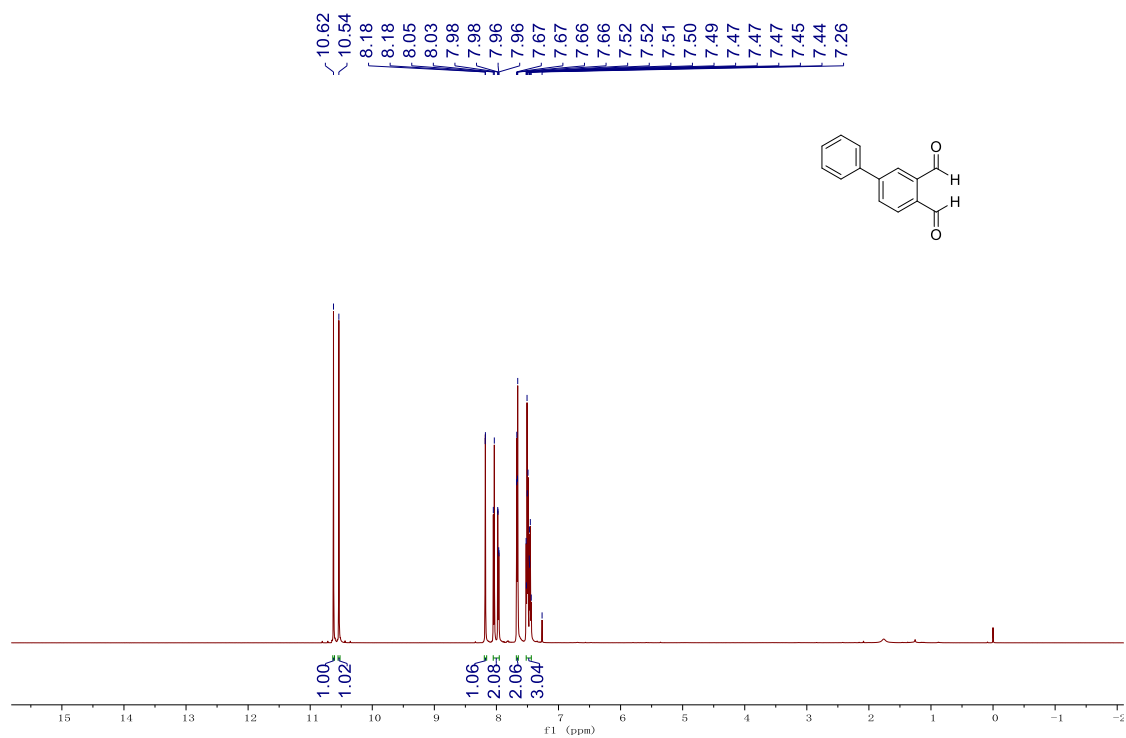

**Fig. S28.** <sup>1</sup>H NMR spectrum of compound **6a**.

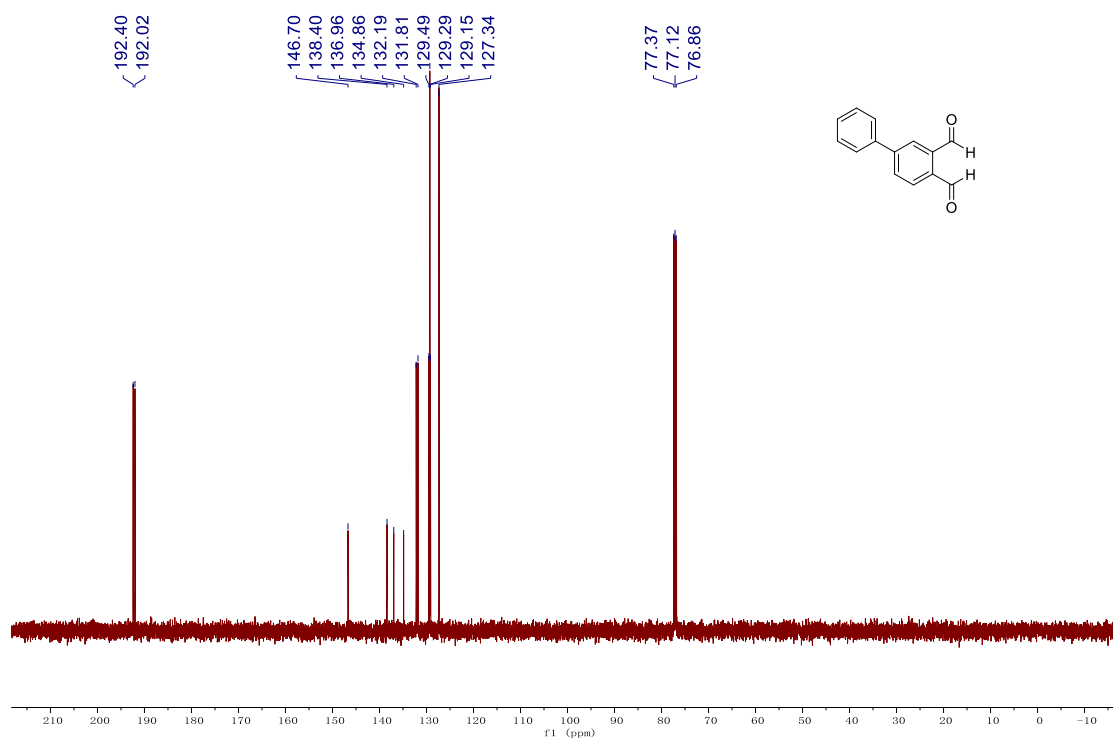

**Fig. S29.** <sup>13</sup>C NMR spectrum of compound **6a**.

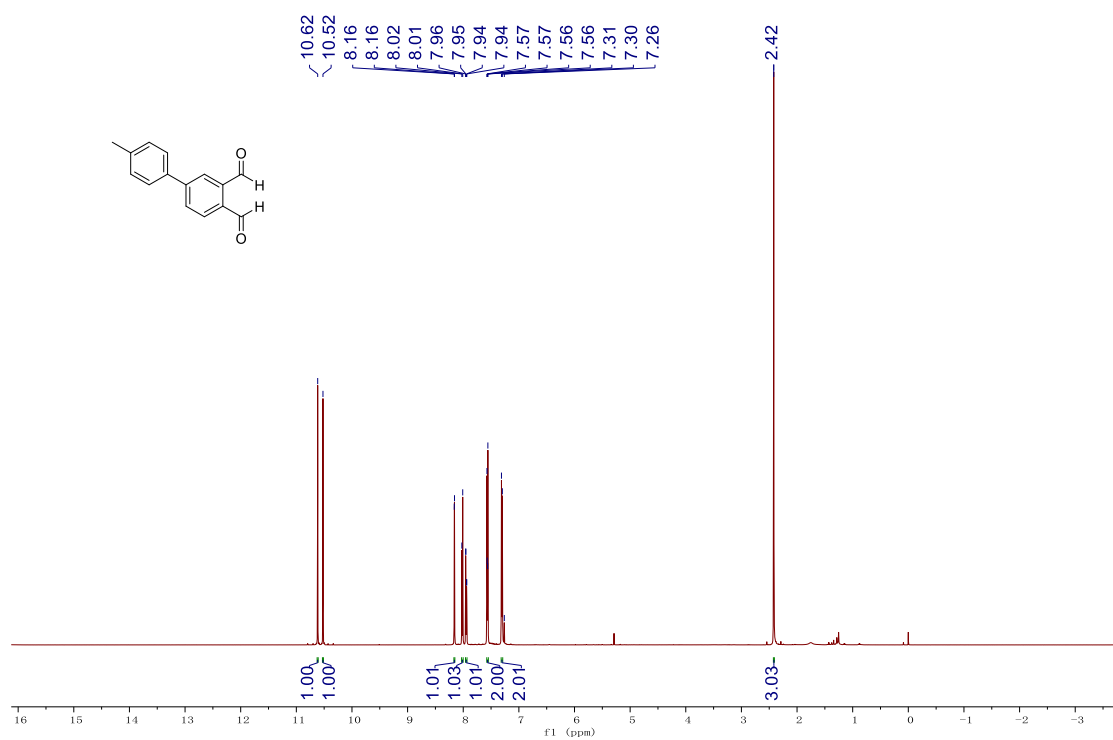

**Fig. S30.** <sup>1</sup>H NMR spectrum of compound **6b**.

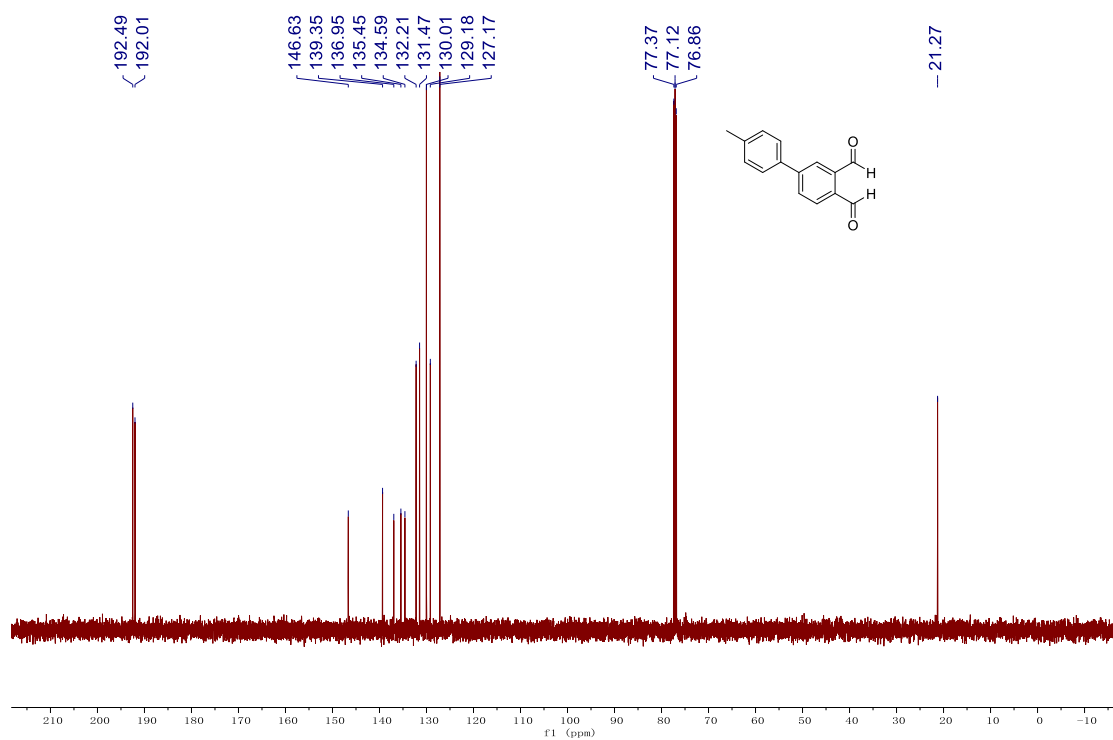

**Fig. S31.** <sup>13</sup>C NMR spectrum of compound **6b**.

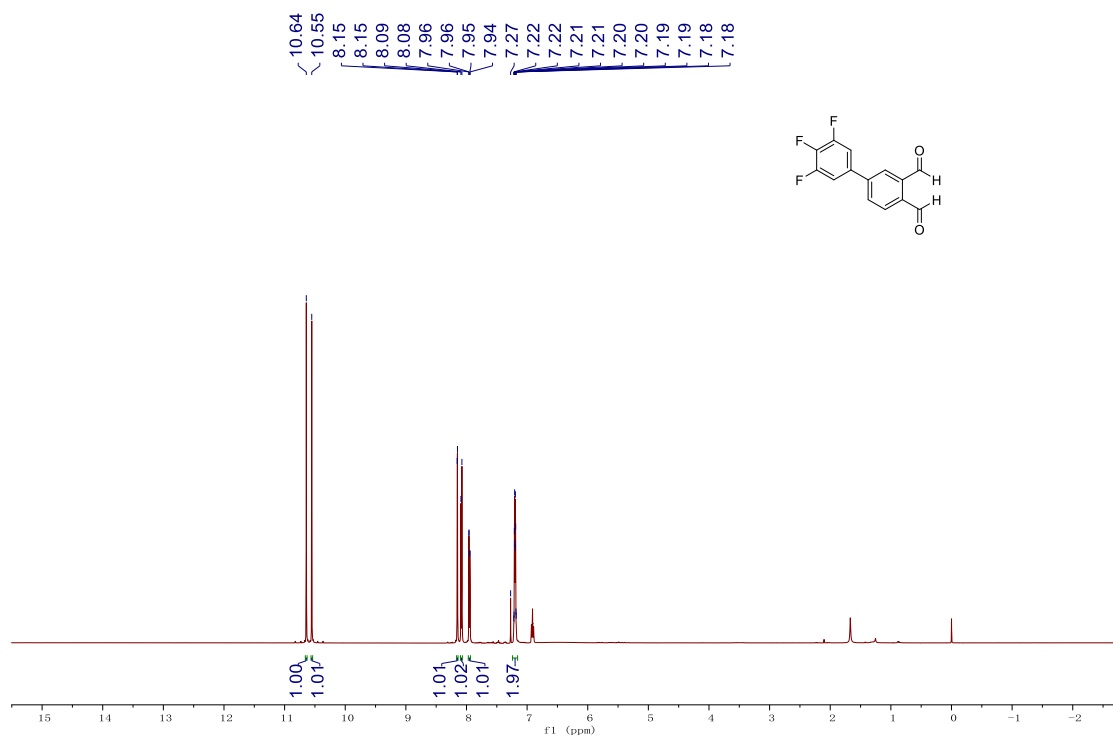

**Fig. S32.** <sup>1</sup>H NMR spectrum of compound **6c**.

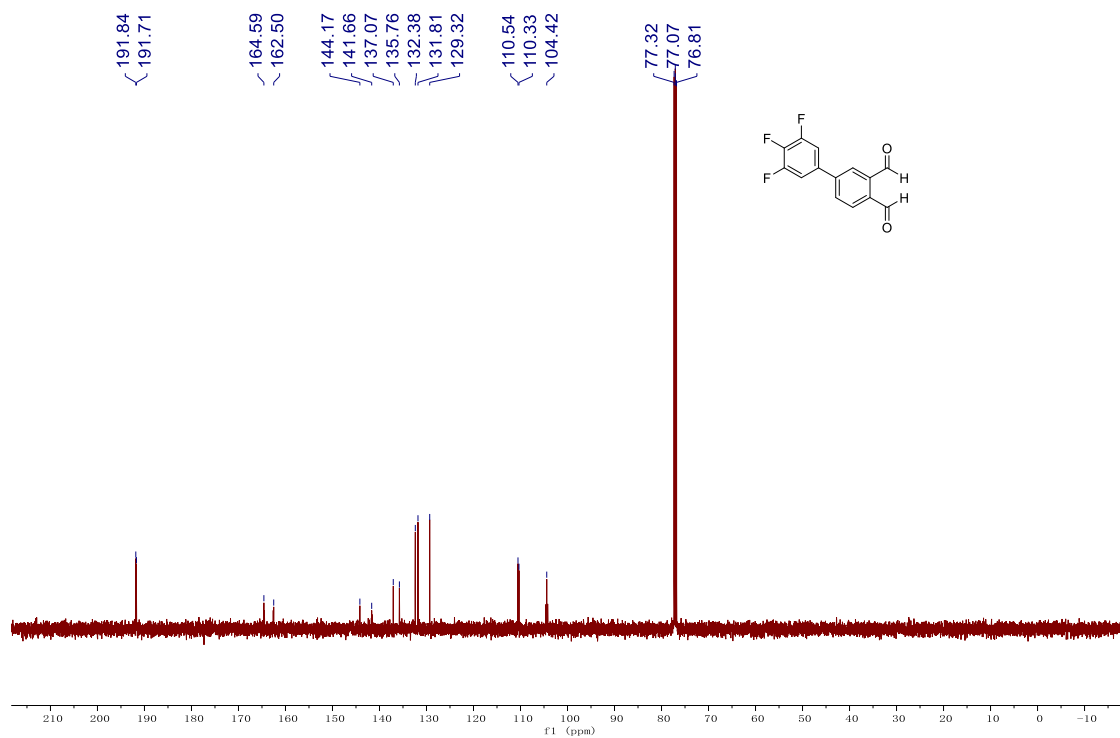

**Fig. S33.** <sup>13</sup>C NMR spectrum of compound **6c**.

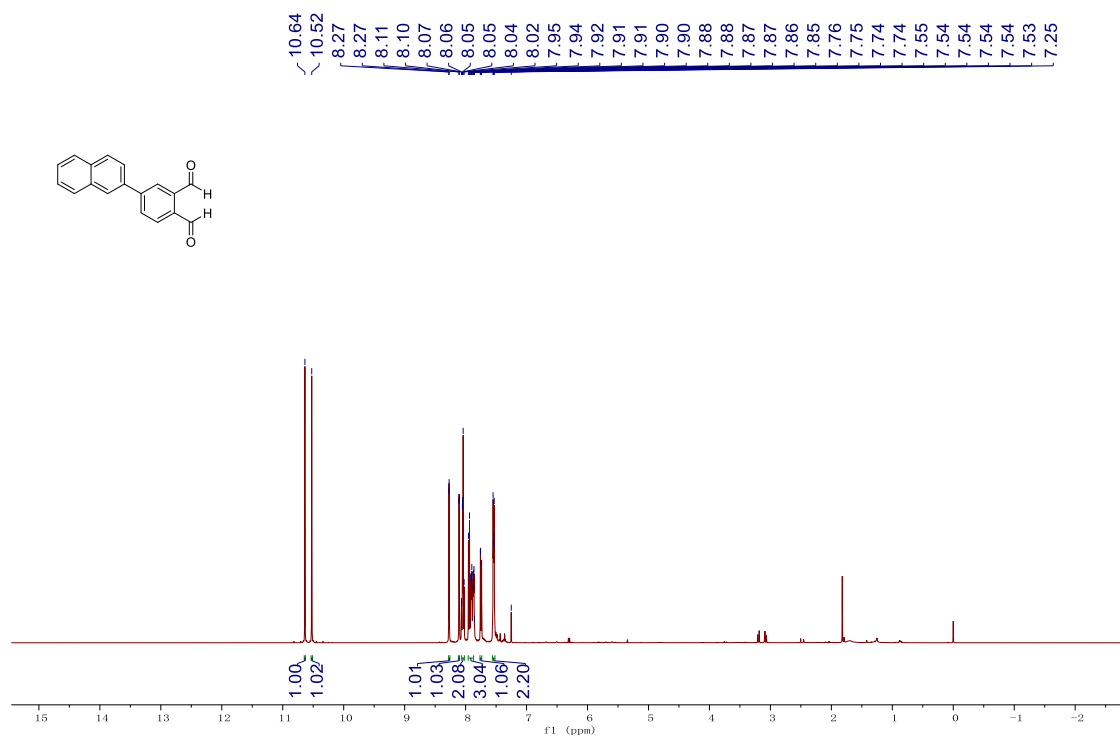

**Fig. S34.** <sup>1</sup>H NMR spectrum of compound **6d**.



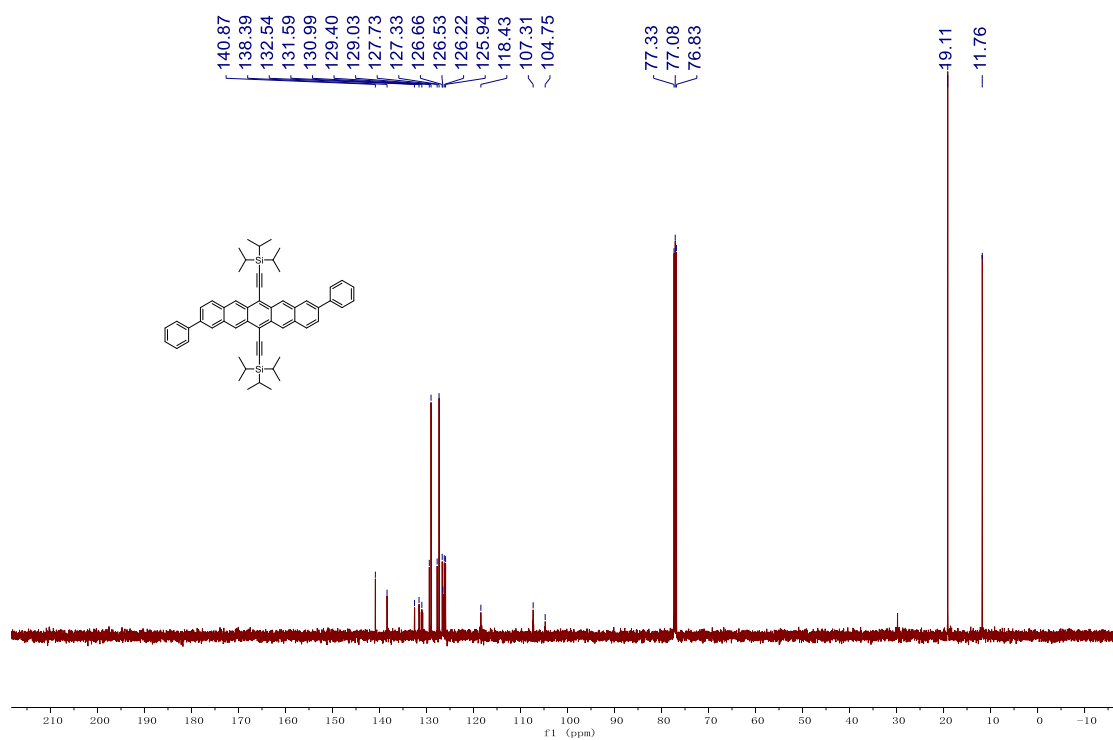

**Fig. S37.**  $^{13}\text{C}$  NMR spectrum of compound **1a**.

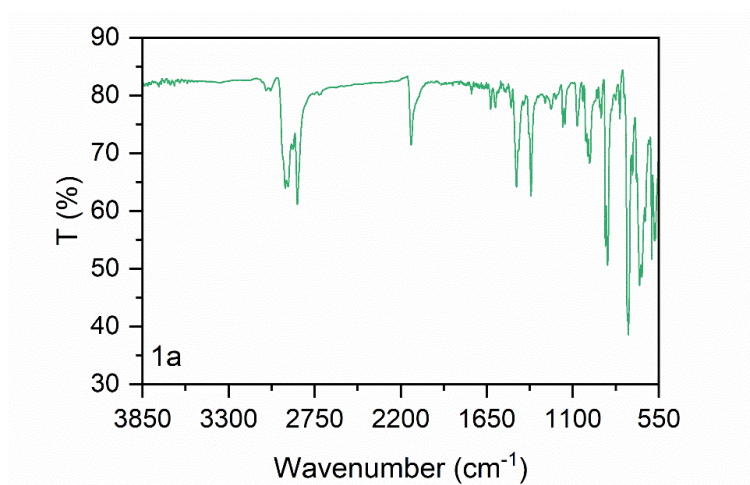

**Fig. S38.** FTIR spectrum of compound **1a**.

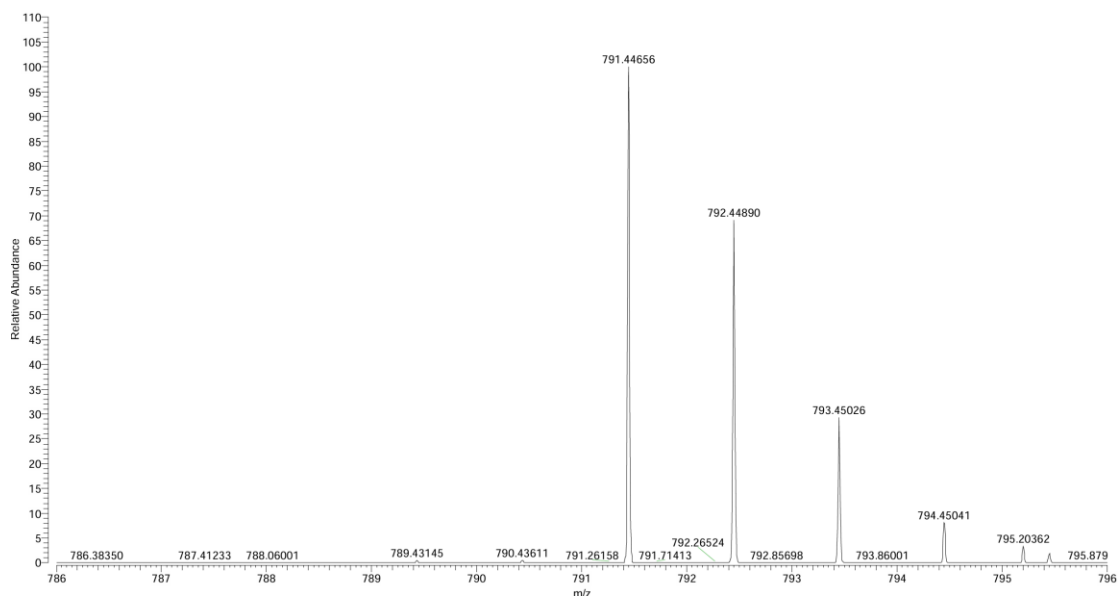

**Fig. S39.** HRMS (APCI) of compound **1a**.

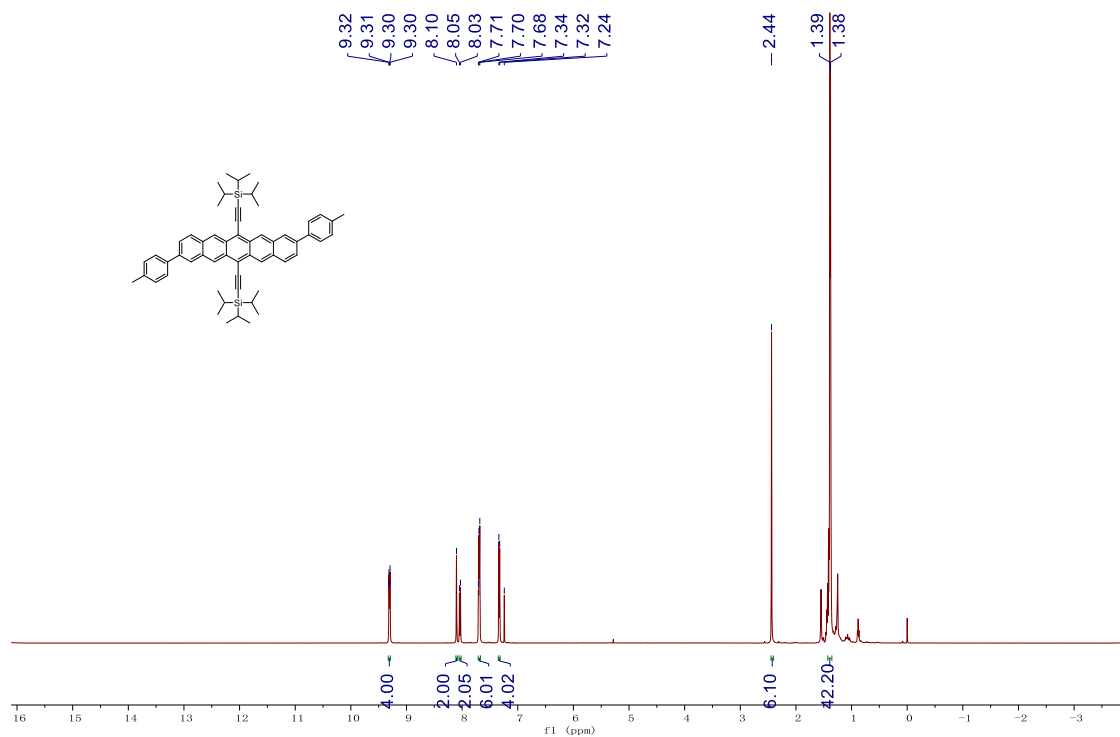

**Fig. S40.** <sup>1</sup>H NMR spectrum of compound **1b**.



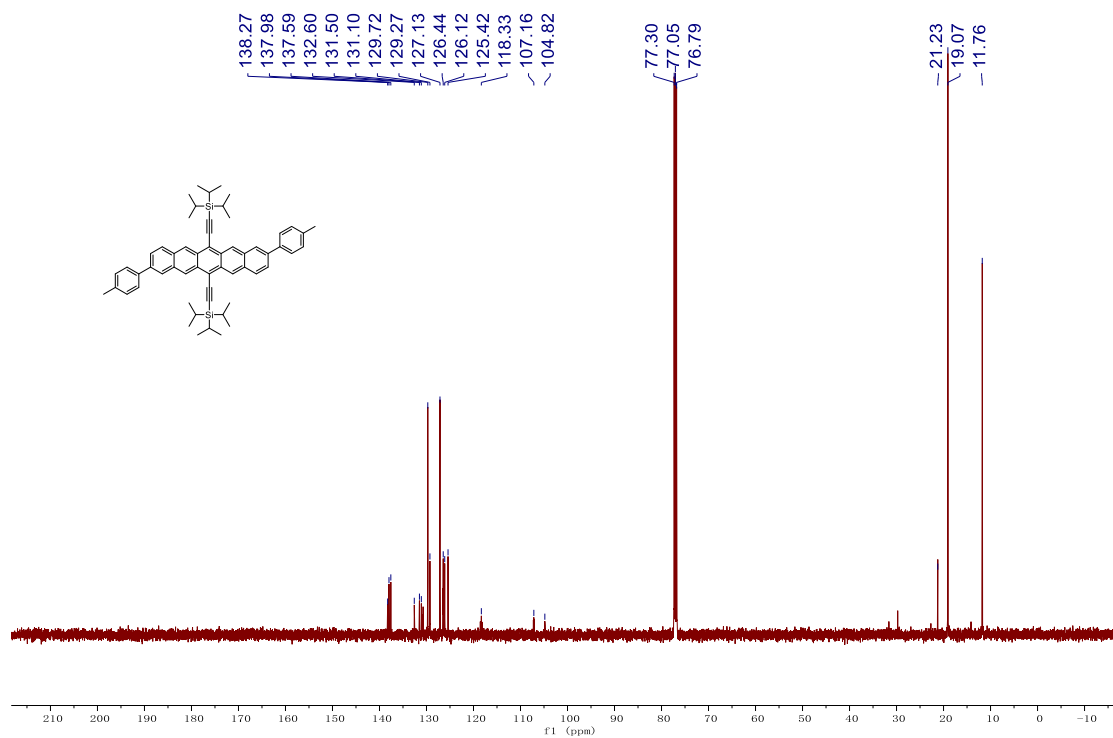

**Fig. S41.**  $^{13}\text{C}$  NMR spectrum of compound **1b**.

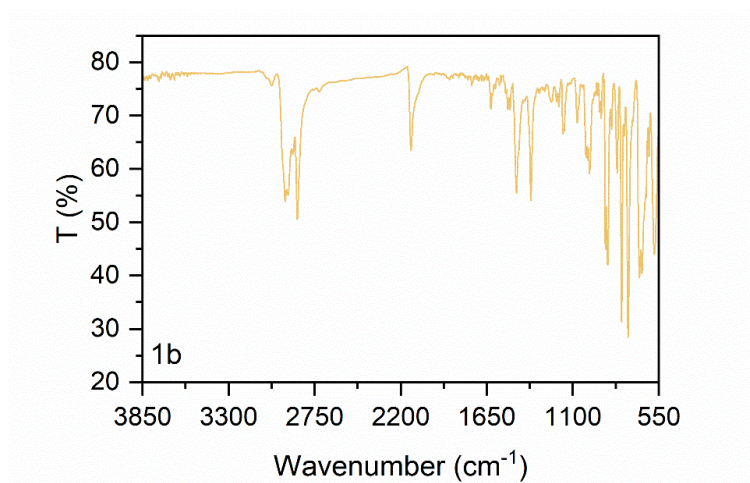

**Fig. S42.** FTIR spectrum of compound **1b**.

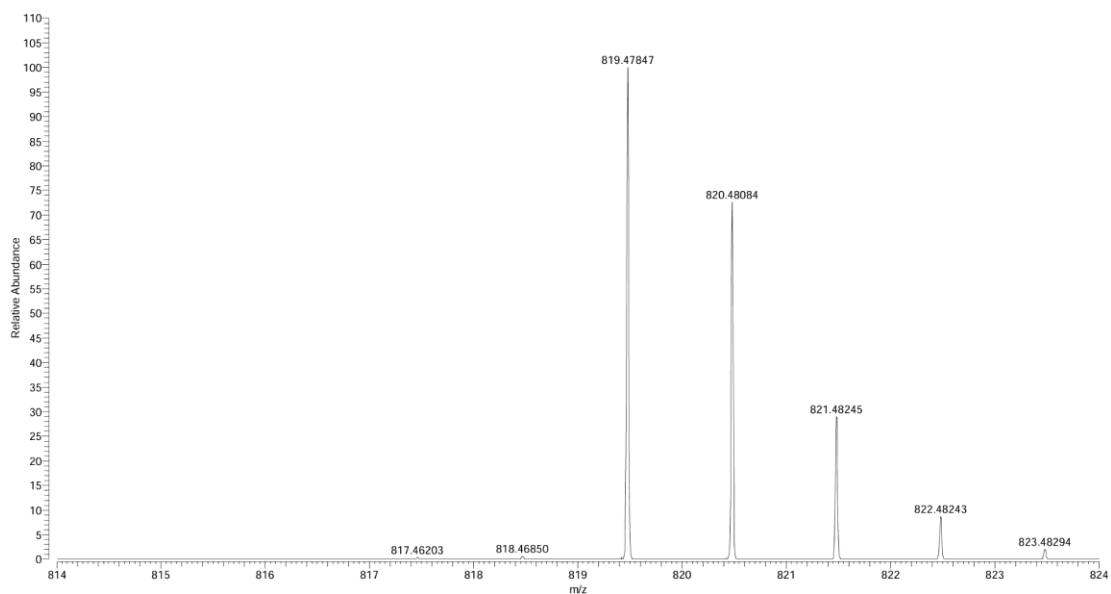

**Fig. S43.** HRMS (APCI) of compound **1b**.

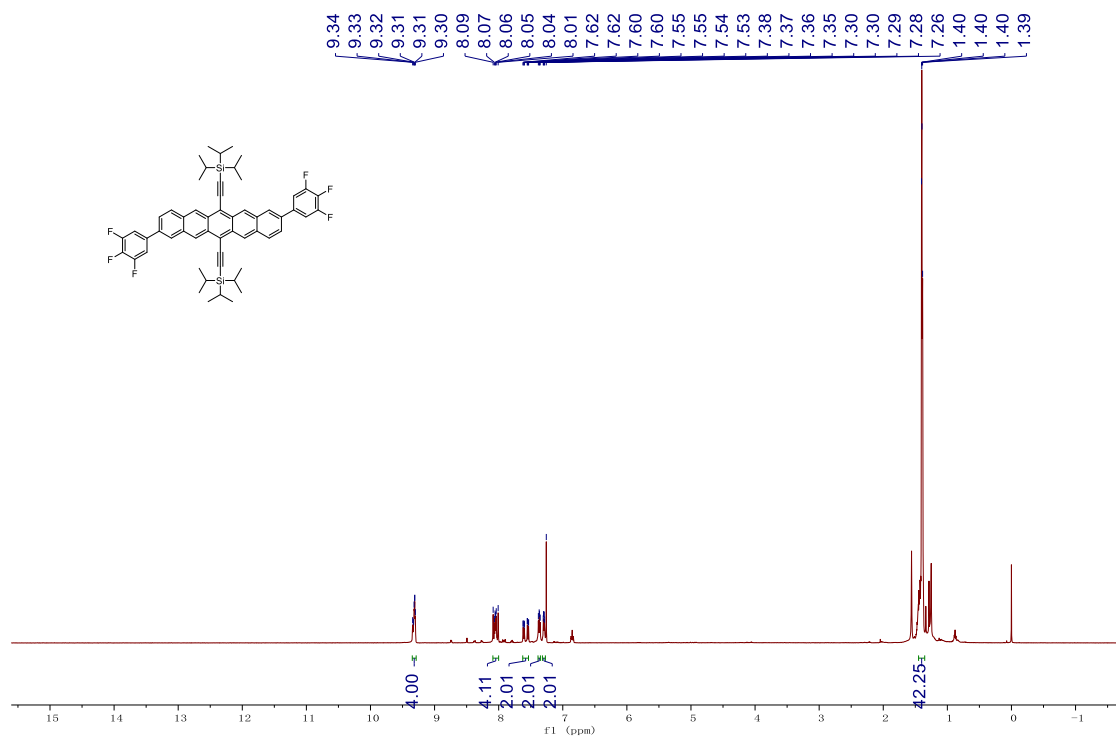

**Fig. S44.**  $^1\text{H}$  NMR spectrum of compound **1c**.

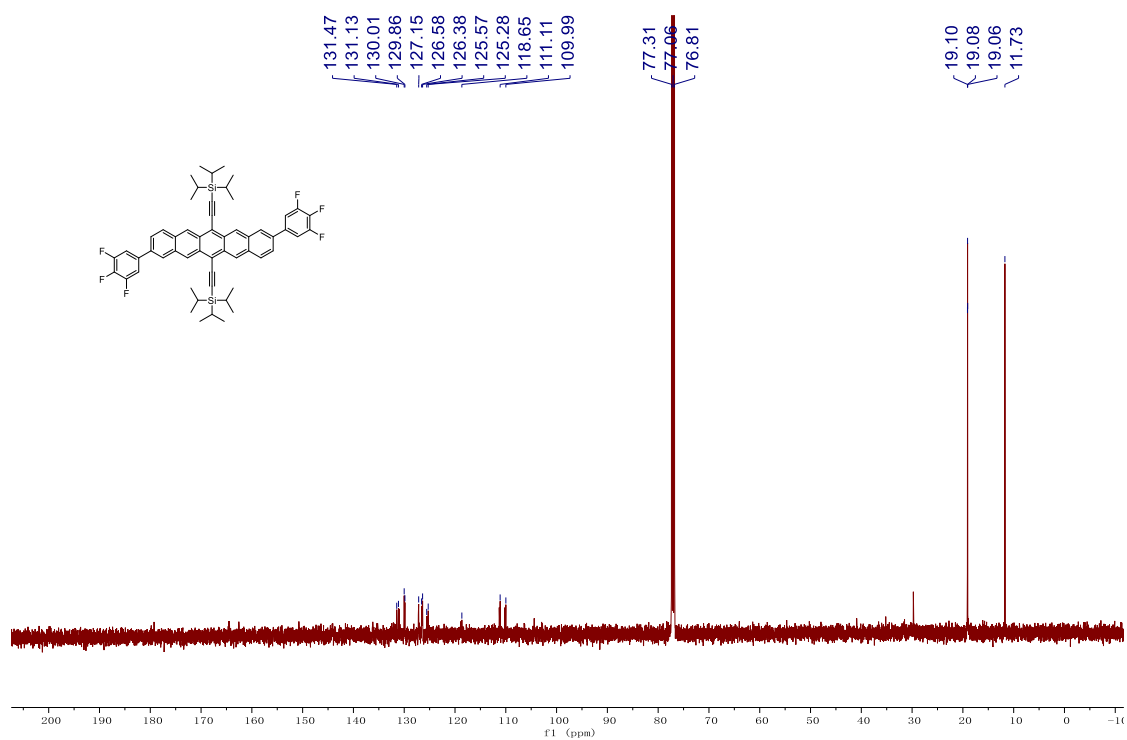

**Fig. S45.**  $^{13}\text{C}$  NMR spectrum of compound **1c**.

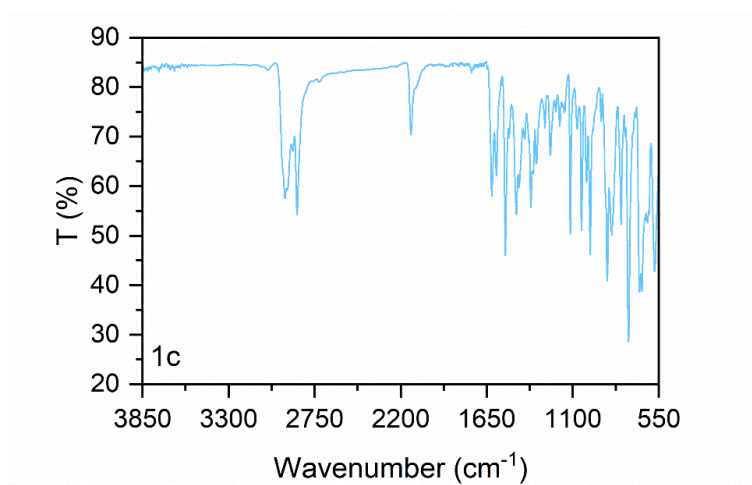

**Fig. S46.** FTIR spectrum of compound **1c**.

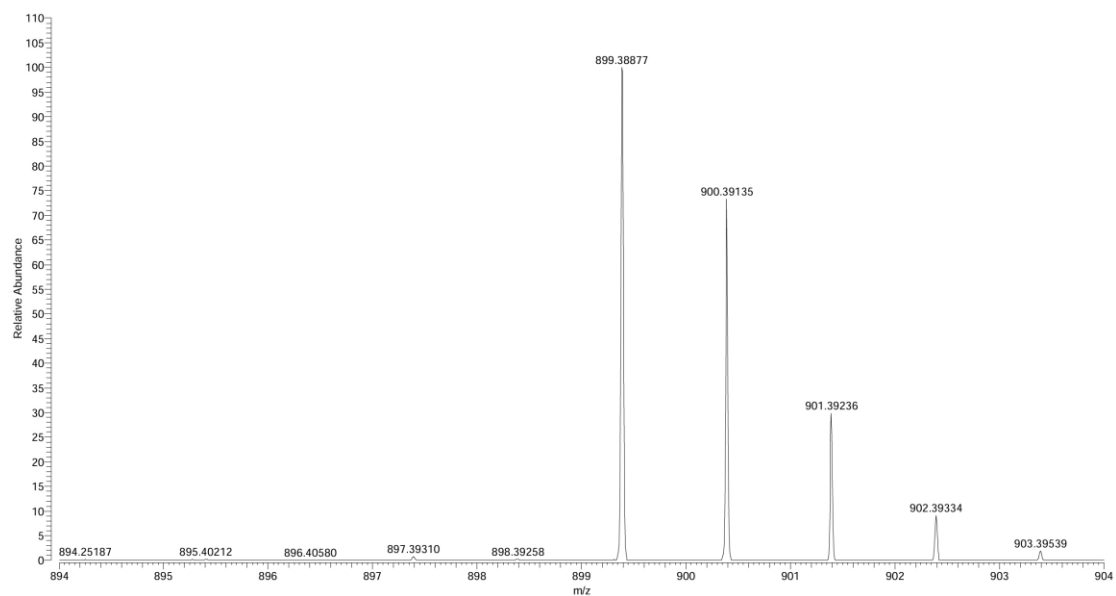

**Fig. S47.** HRMS (APCI) of compound **1c**.

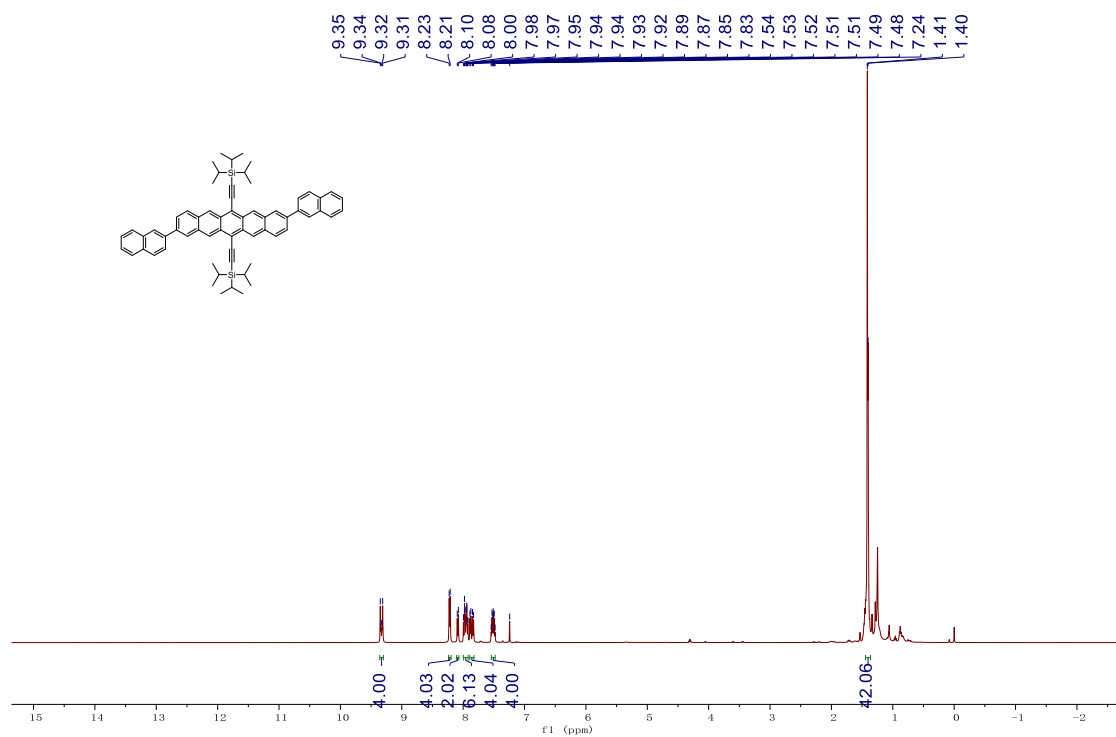

**Fig. S48.**  $^1\text{H}$  NMR spectrum of compound **1d**.

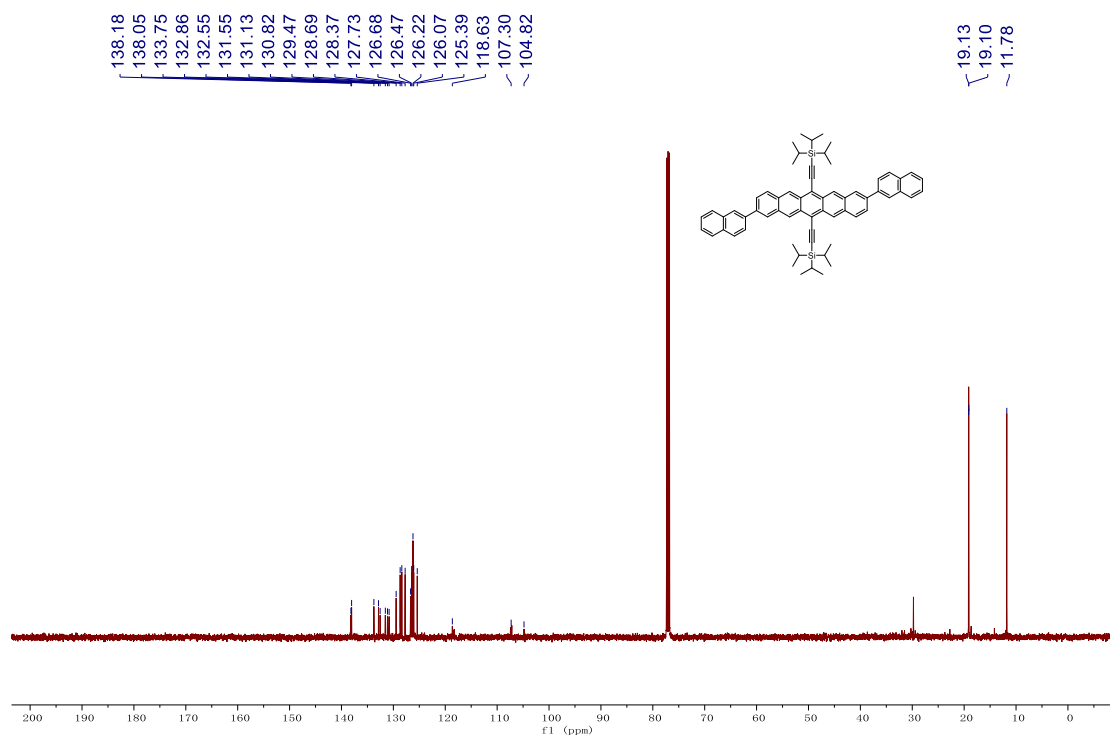

**Fig. S49.** <sup>13</sup>C NMR spectrum of compound **1d**.

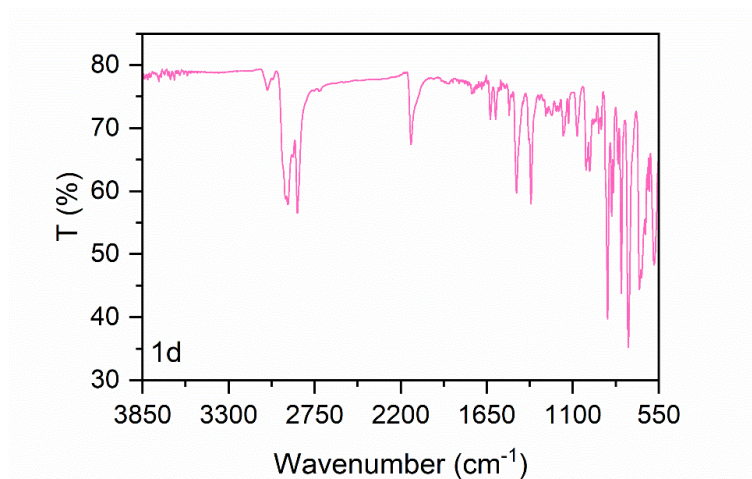

**Fig. S50.** FTIR spectrum of compound **1d**.

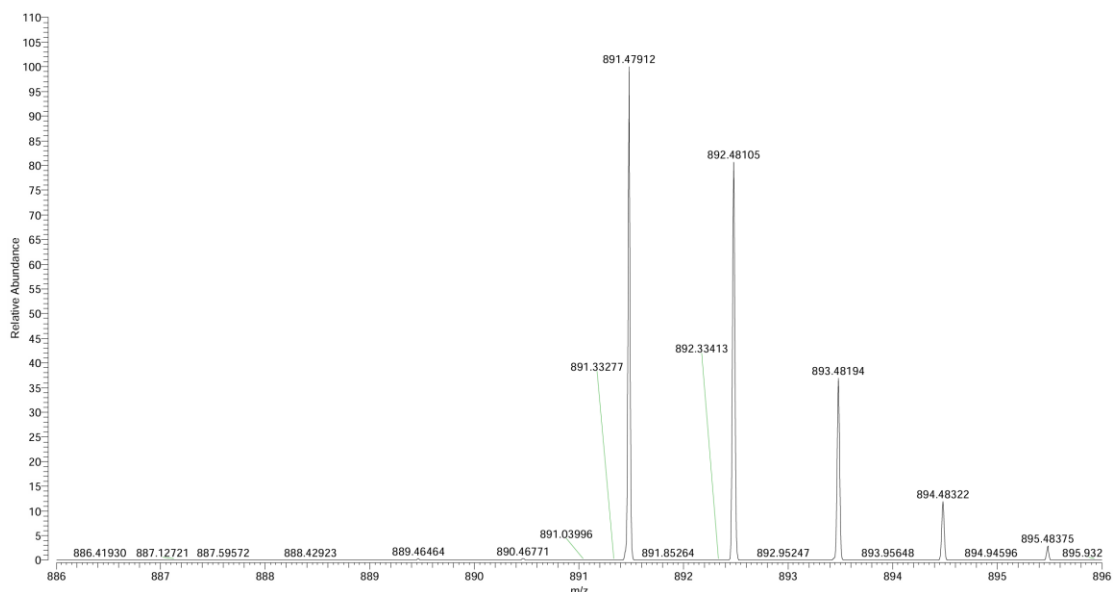

**Fig. S51.** HRMS (APCI) of compound **1d**.

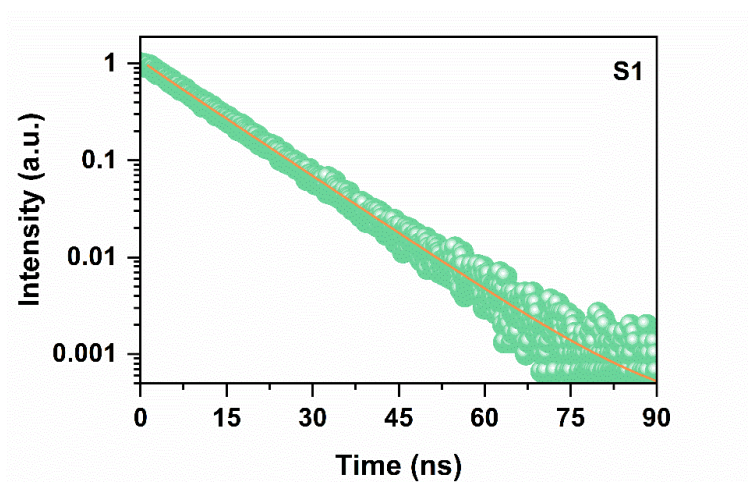

**Fig. S52.** Fluorescence decays of compound **S1** at 500nm.

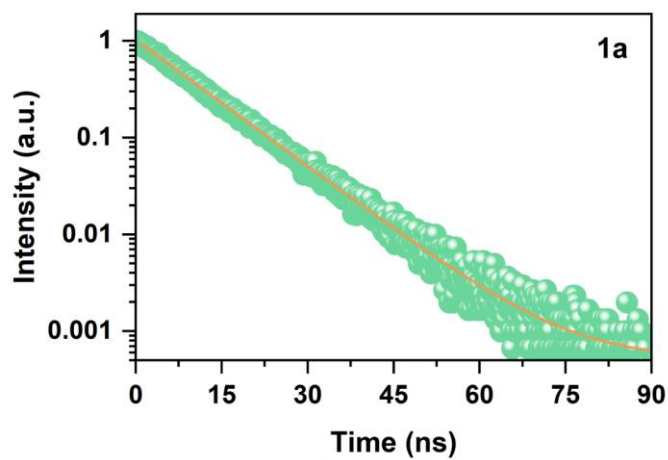

**Fig. S53.** Fluorescence decays of compound **1a** at 500nm.

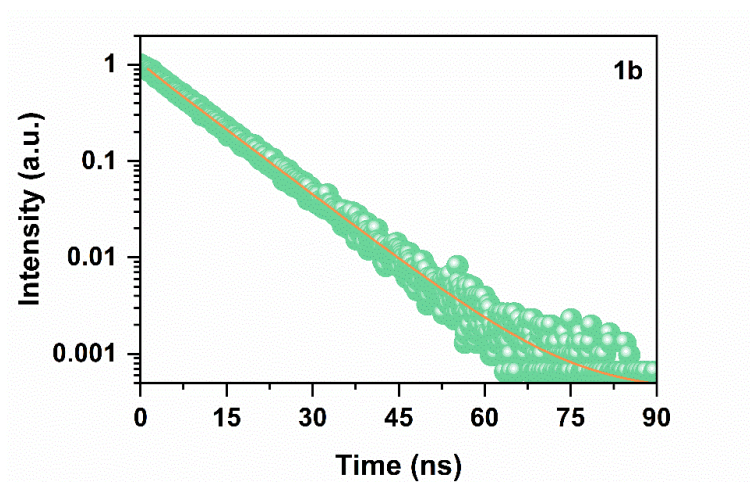

**Fig. S54.** Fluorescence decays of compound **1b** at 500nm.

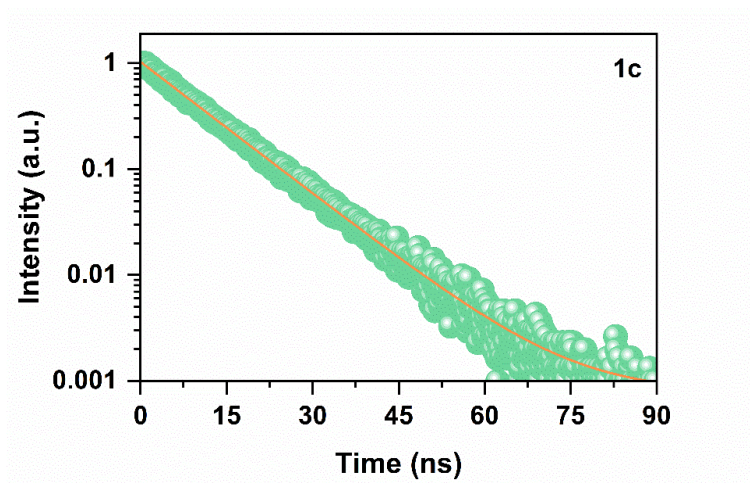

**Fig. S55.** Fluorescence decays of compound **1c** at 500nm.

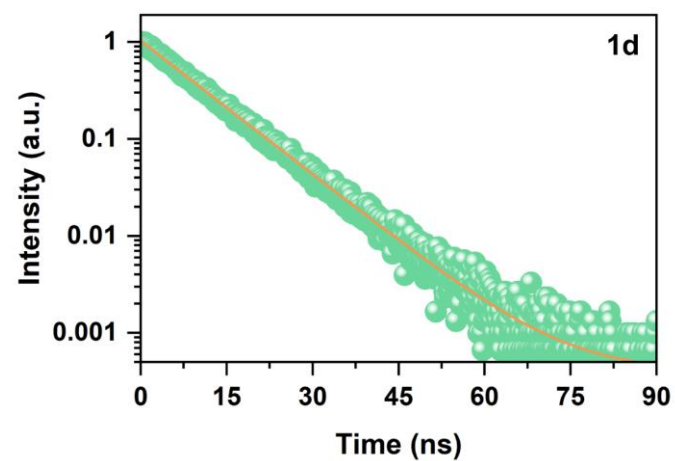

**Fig. S56.** Fluorescence decays of compound **1d** at 500nm.



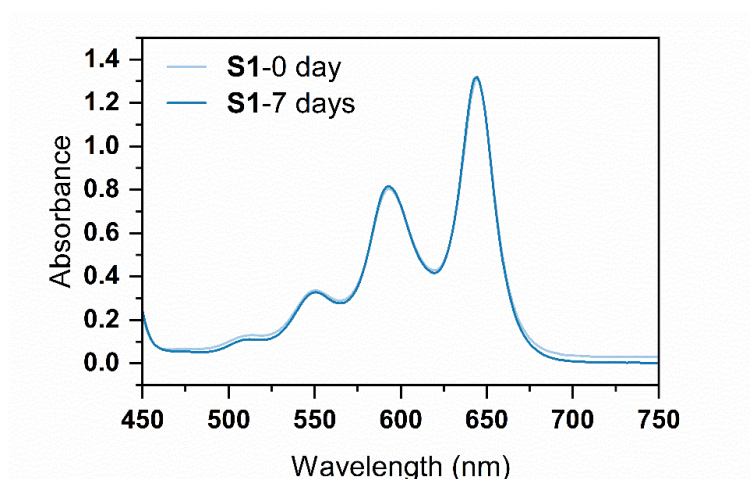

**Fig. S57.** UV-Vis absorption spectra of **S1**, freshly prepared and after 7 days respectively.

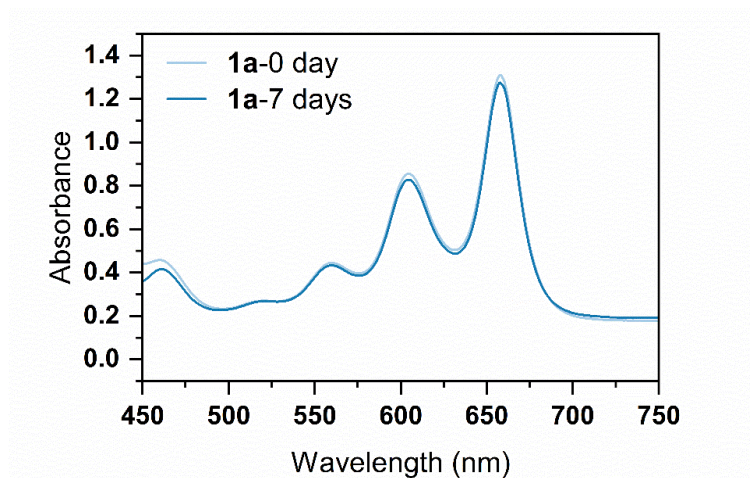

**Fig. S58.** UV-Vis absorption spectra of **1a**, freshly prepared and after 7 days respectively.

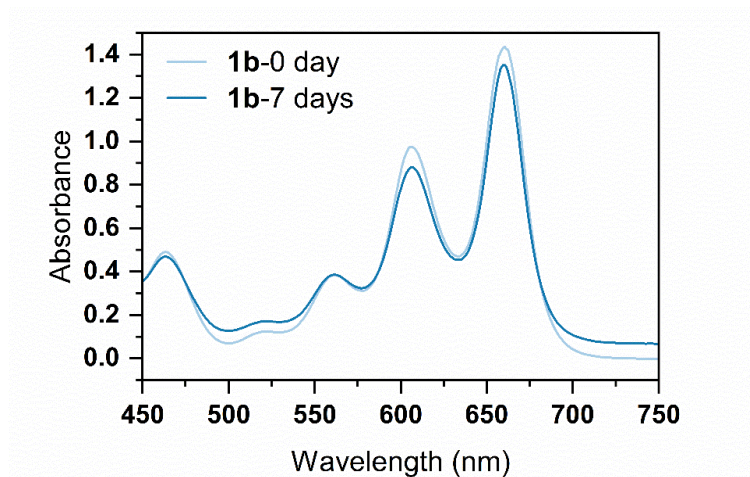

**Fig. S59.** UV-Vis absorption spectra of **1b**, freshly prepared and after 7 days respectively.



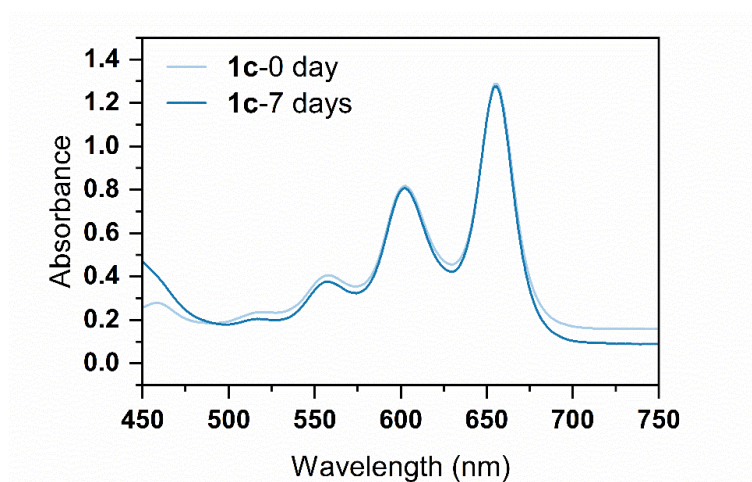

**Fig. S60.** UV-Vis absorption spectra of **1c**, freshly prepared and after 7 days respectively.

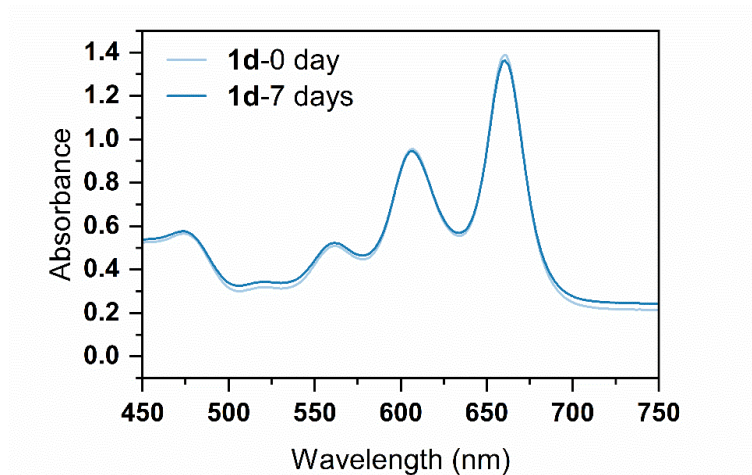

**Fig. S61.** UV-Vis absorption spectra of **1d**, freshly prepared and after 7 days respectively.

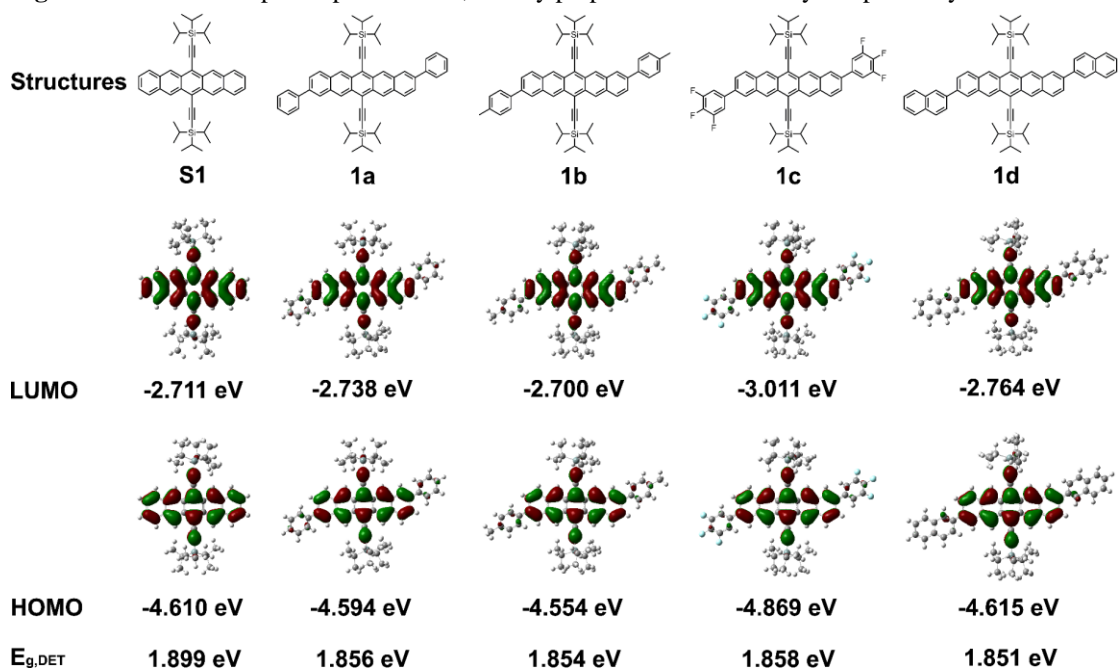

**Fig. S62.** Calculation(B3LYP/6-31G\*) and frontier molecular orbitals of **S1** and **1a~d**.

**Table S6** Photophysical properties and computational results for **S1** and **1a~d**.

| compound  | $\lambda_{\text{abs,max}}$ (nm) | $\lambda_{\text{em,max}}$ (nm) | $\lambda_{\text{onset}}$ (nm) | $\tau$ (ns) <sup>[a]</sup> | $E_{\text{g,opt}}$ (eV) <sup>[b]</sup> | $E_{\text{g,DFT}}$ (eV) <sup>[c]</sup> | $\Delta E_{\text{ST}}$ (eV) <sup>[d]</sup> |
|-----------|---------------------------------|--------------------------------|-------------------------------|----------------------------|----------------------------------------|----------------------------------------|--------------------------------------------|
| <b>S1</b> | 646                             | 665                            | 670                           | 10.949                     | 1.850                                  | 1.899                                  | 1.970                                      |
| <b>1a</b> | 658                             | 677                            | 684                           | 10.468                     | 1.813                                  | 1.856                                  | 1.940                                      |
| <b>1b</b> | 659                             | 682                            | 688                           | 9.937                      | 1.802                                  | 1.854                                  | 1.936                                      |
| <b>1c</b> | 655                             | 675                            | 682                           | 9.571                      | 1.818                                  | 1.858                                  | 1.940                                      |
| <b>1d</b> | 660                             | 684                            | 690                           | 9.434                      | 1.797                                  | 1.851                                  | 1.936                                      |

[a] Fluorescence lifetimes excited at 500 nm. [b] Optical gap calculated by  $\lambda_{\text{onset}}$ ,  $E_{\text{g,opt}} = 1240/\lambda_{\text{onset}}$ . [c]  $E_{\text{g,DFT}}$  from DFT calculations with B3LYP/6-31G\* level. [d]  $\Delta E_{\text{ST}}$  from TD-DFT calculations with M06-2X/def2-SVP level.

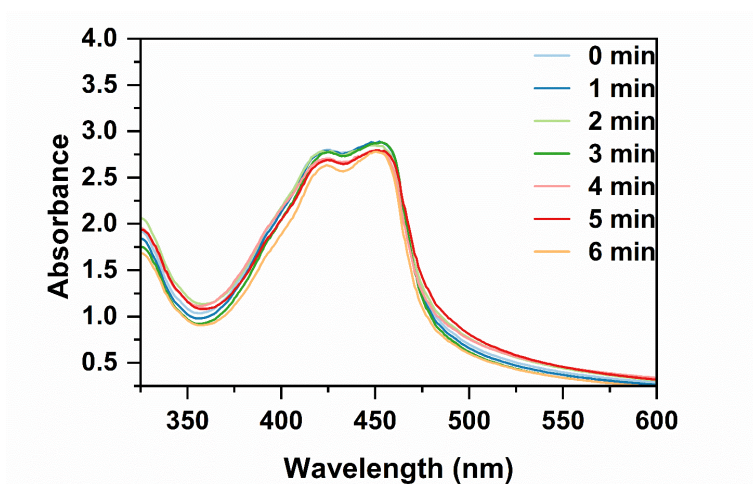**Fig. S63.** UV-Vis spectra of DPBF solution mixed with **S1** under US irradiation (1 W/cm<sup>2</sup>, 1 MHz, 50% duty cycle).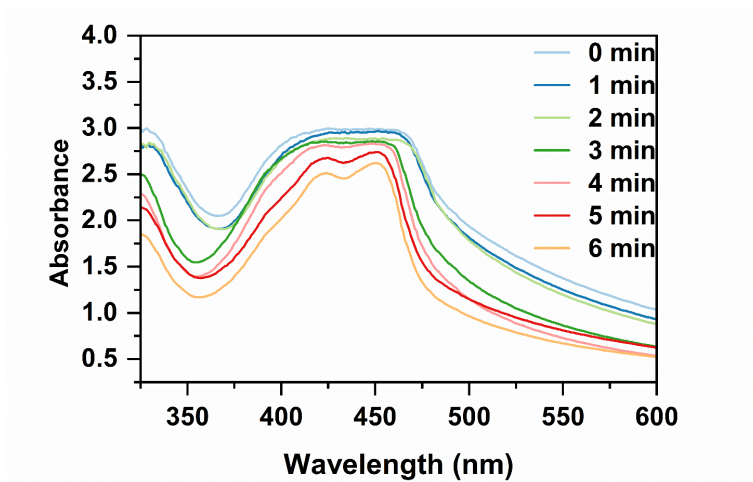**Fig. S64.** UV-Vis spectra of DPBF solution mixed with **1a** under US irradiation (1 W/cm<sup>2</sup>, 1 MHz, 50% duty cycle).

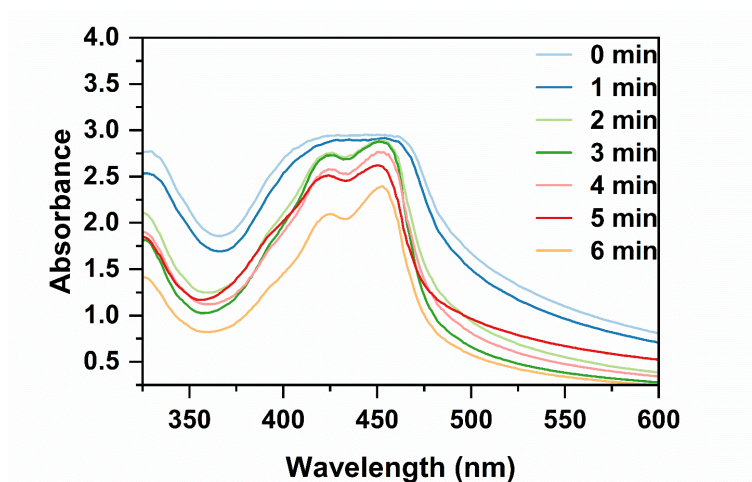

**Fig. S65.** UV-Vis spectra of DPBF solution mixed with **1b** under US irradiation (1 W/cm<sup>2</sup>, 1 MHz, 50% duty cycle).

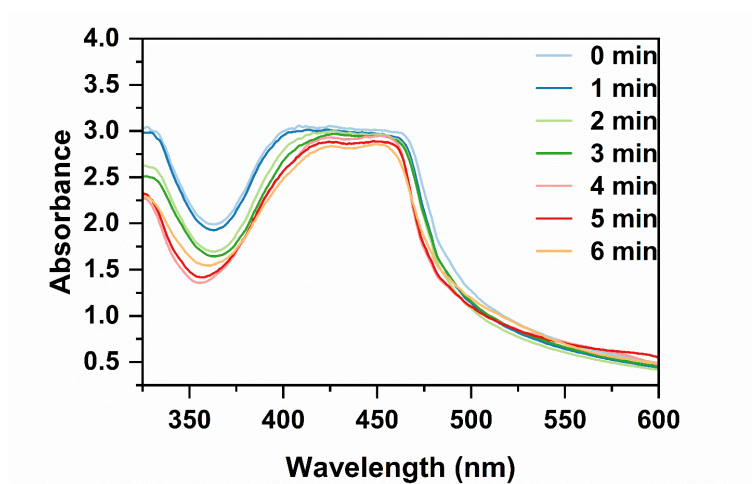

**Fig. S66.** UV-Vis spectra of DPBF solution mixed with **1c** under US irradiation (1 W/cm<sup>2</sup>, 1 MHz, 50% duty cycle).

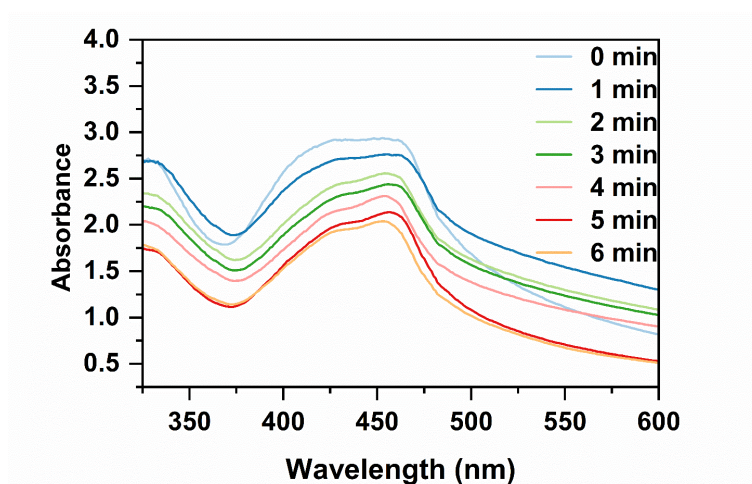

**Fig. S67.** UV-Vis spectra of DPBF solution mixed with **1d** under US irradiation (1 W/cm<sup>2</sup>, 1 MHz, 50% duty cycle).



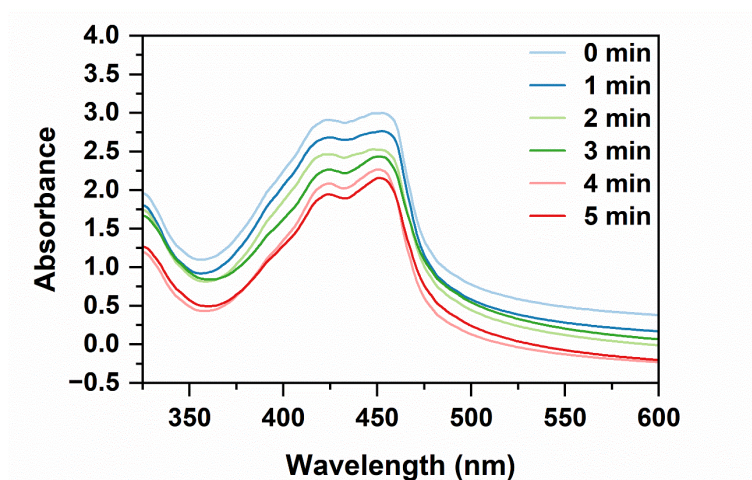

**Fig. S68.** UV-Vis spectra of DPBF solution mixed with the PBS solution of **1d** under US irradiation (1 W/cm<sup>2</sup>, 1 MHz, 50% duty cycle).

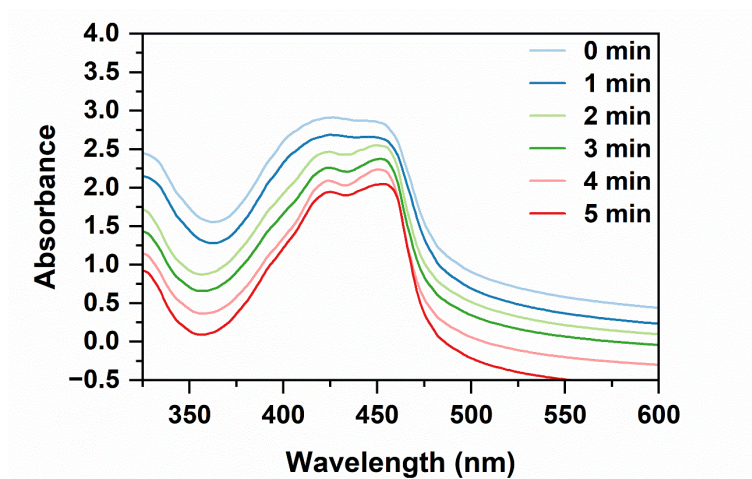

**Fig. S69.** UV-Vis spectra of DPBF solution mixed with the PBS solution of **1d** after 24 h under US irradiation (1 W/cm<sup>2</sup>, 1 MHz, 50% duty cycle).

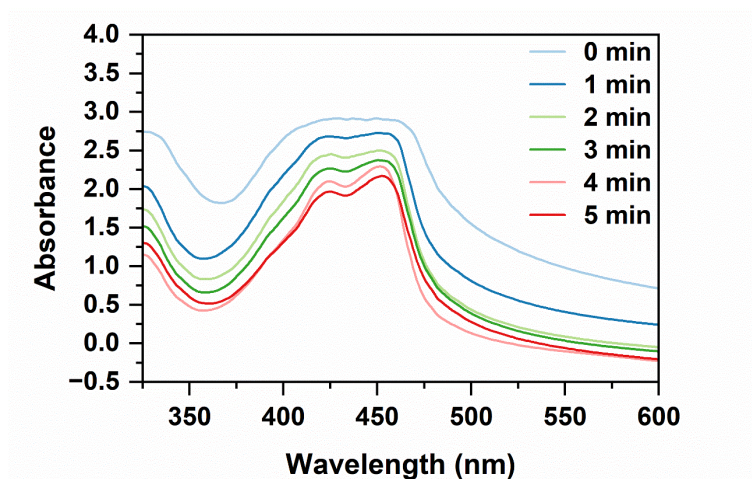

**Fig. S70.** UV-Vis spectra of DPBF solution mixed with the PBS solution of **1d** after 48 h under US irradiation (1 W/cm<sup>2</sup>, 1 MHz, 50% duty cycle).

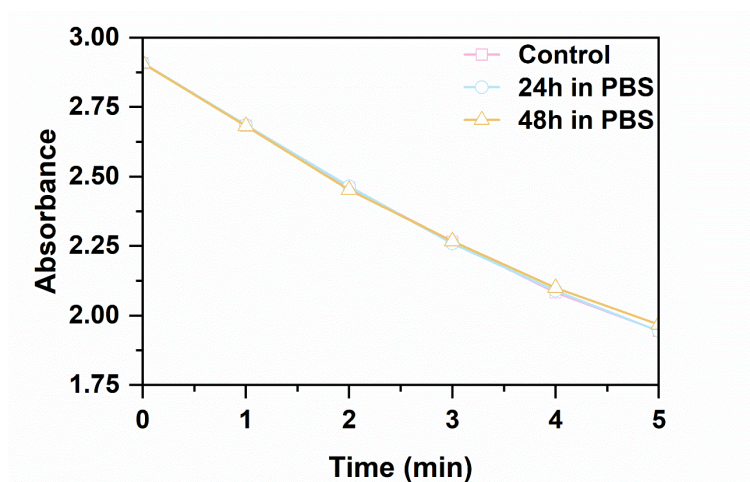

**Fig. S71.** Oxidation rates of DPBF under US irradiation under different conditions.

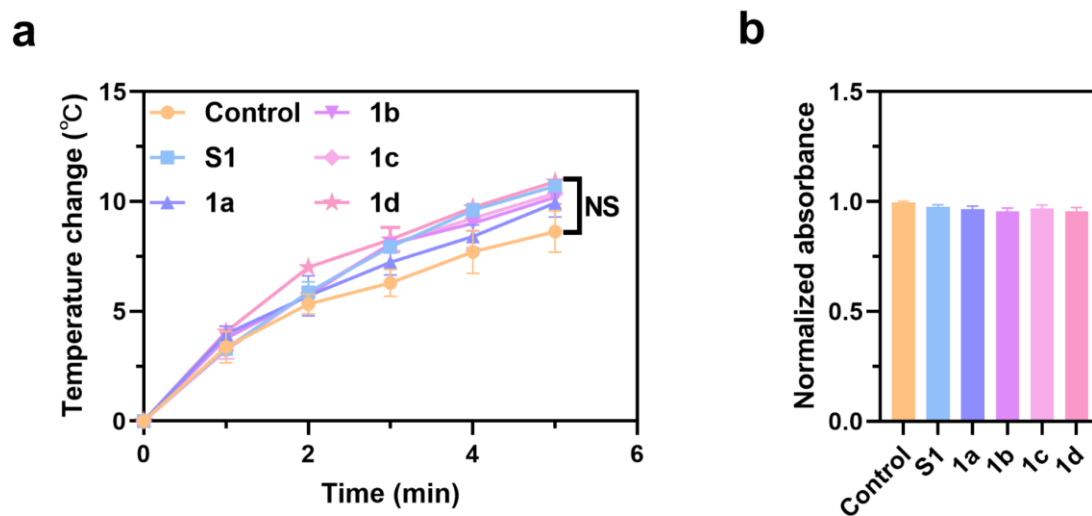

**Fig. S72.** (a) Temperature changes of Control, S1, 1a, 1b, 1c and 1d under US irradiation (1.0 W/cm<sup>2</sup>, 1.0 MHz, 50% duty cycle) for different time intervals. NS: no significance. (b) Absorbance changes of DPBF at 410 nm in the presence of S1, 1a, 1b, 1c and 1d after heating at 80 °C for 30 min.

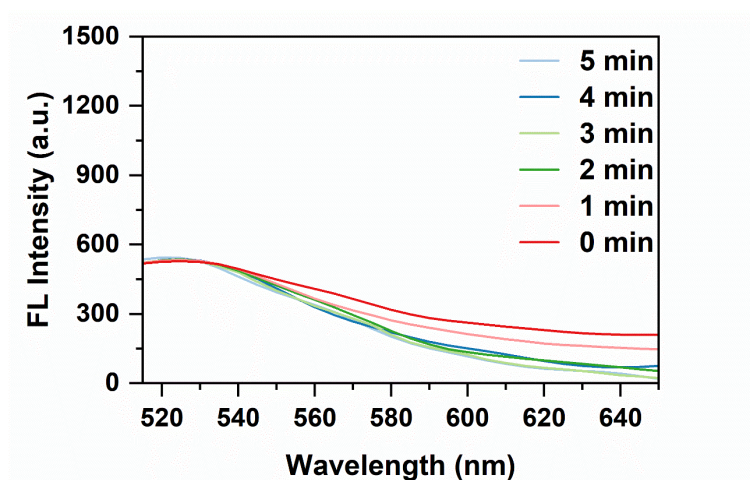

**Fig. S73.** Fluorescence spectra of SOSG solution mixed with H<sub>2</sub>O under US treatment.

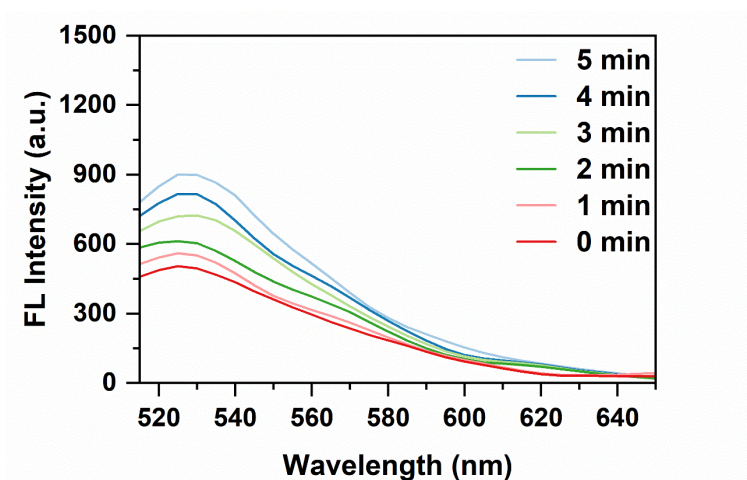

**Fig. S74.** Fluorescence spectra of SOSG solution mixed with **S1** under US treatment.

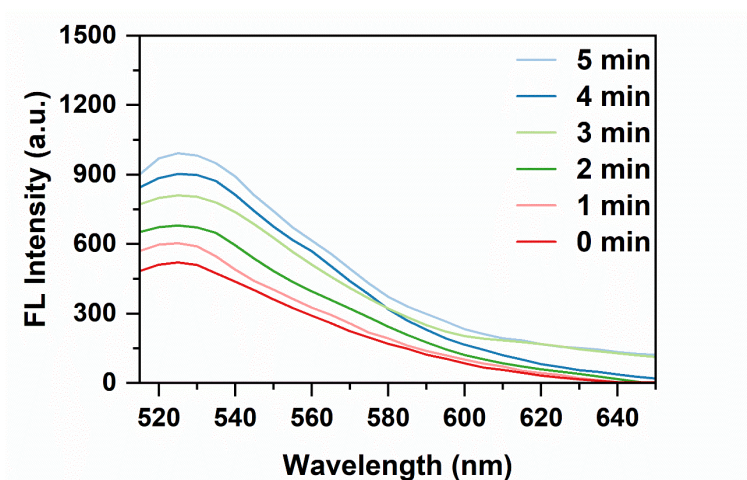

**Fig. S75.** Fluorescence spectra of SOSG solution mixed with **1a** under US treatment.

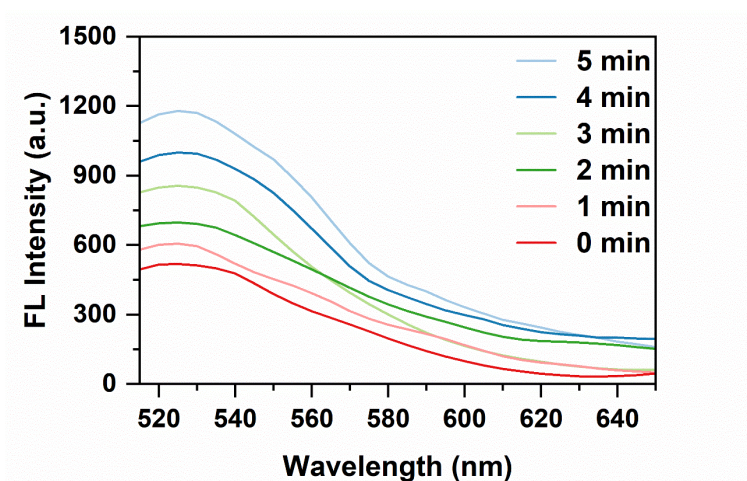

**Fig. S76.** Fluorescence spectra of SOSG solution mixed with **1b** under US treatment.



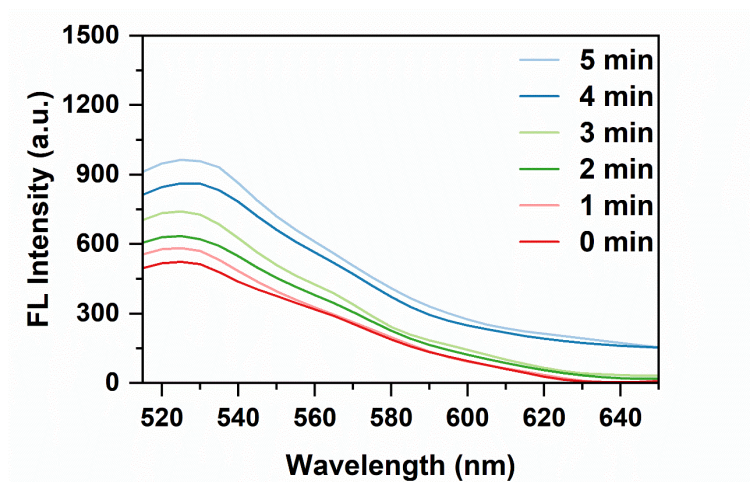

**Fig. S77.** Fluorescence spectra of SOSG solution mixed with **1c** under US treatment.

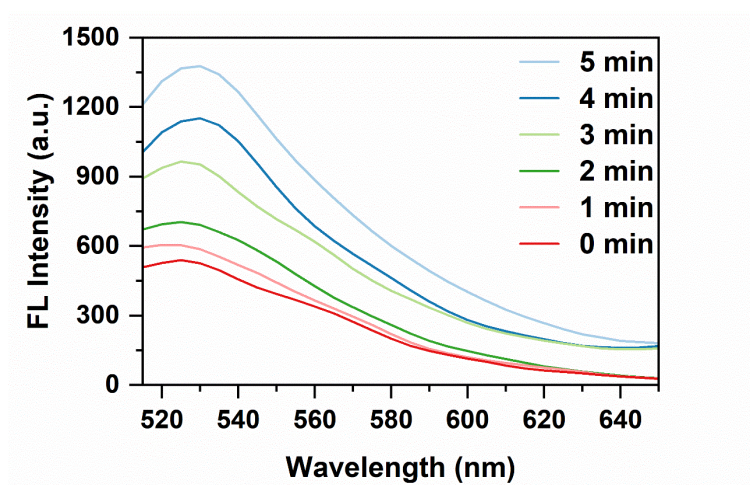

**Fig. S78.** Fluorescence spectra of SOSG solution mixed with **1d** under US treatment.

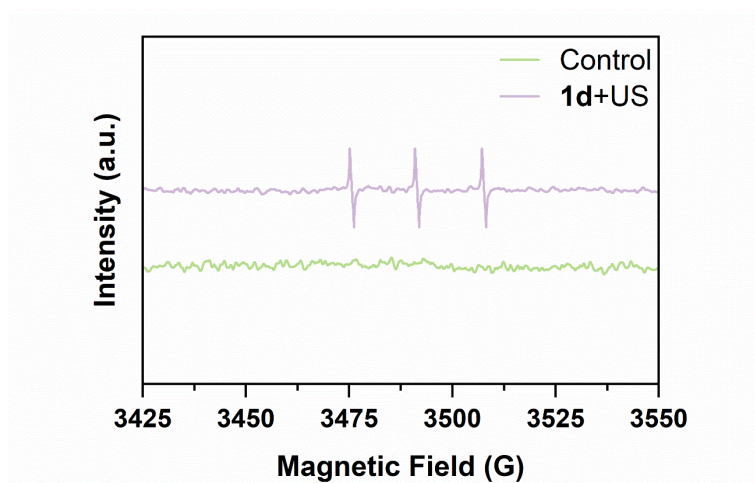

**Fig. S79.** ESR spectra of  $^1\text{O}_2$  generation by **1d** under US irradiation captured by TEMP.

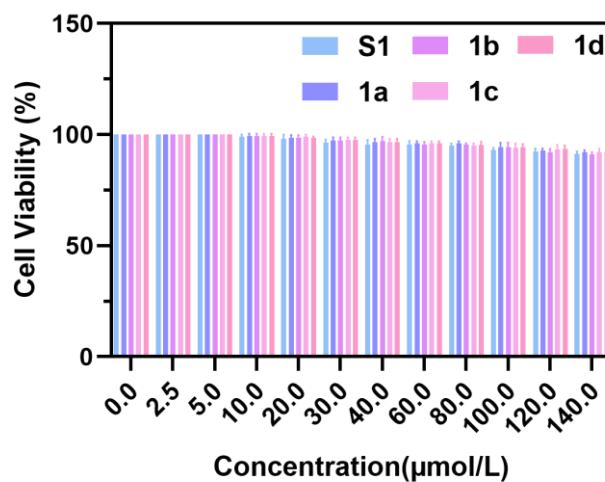

**Fig. S80.** Cytotoxicity of S1, 1a, 1b, 1c and 1d against NCTC 1469 cells.

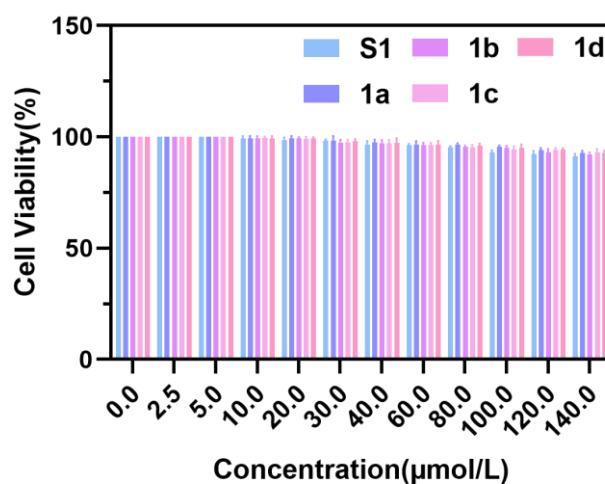

**Fig. S81.** Cytotoxicity of S1, 1a, 1b, 1c and 1d against L02 cells.

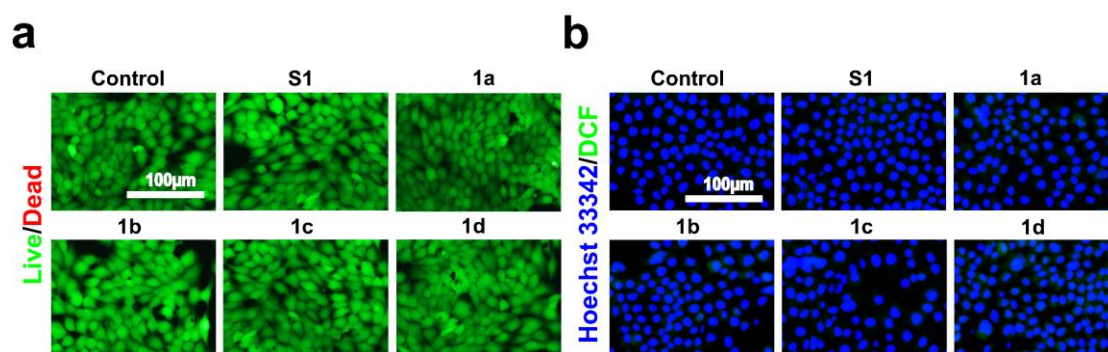

**Fig. S82.** (a) Fluorescent images of 4T1 cells stained with calcein AM (green) and propidium iodide (PI, red). (b) Fluorescent images of 4T1 cells stained with Hoechst 33342 and DCFH-DA to detect ROS.



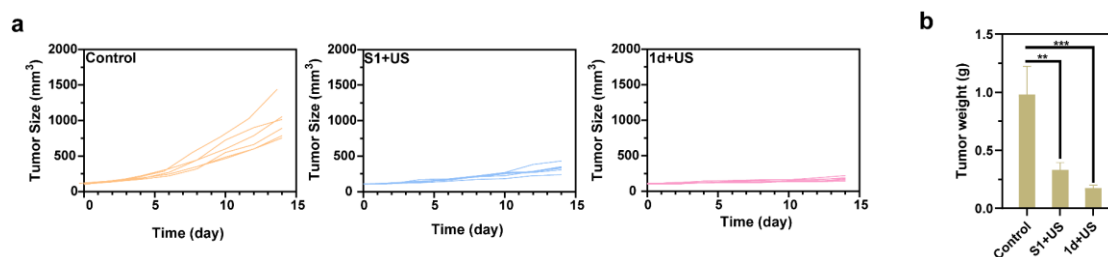

**Fig. S83.** (a) Tumor volume of each mouse in each group changing during treatment (n=6, mean  $\pm$  SD). (b) Tumor weights on average at the end of the treatment.

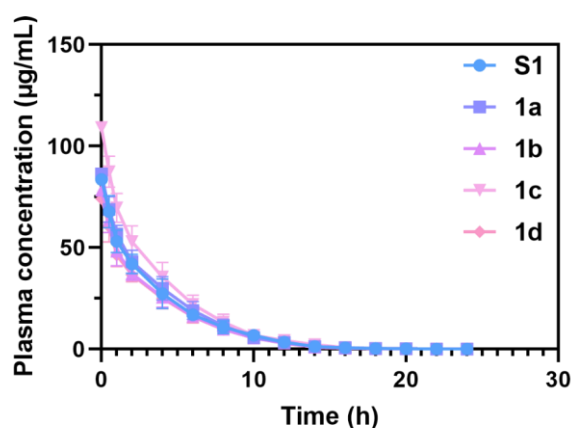

**Fig.S84.** Time-dependent plasma concentrations of **S1** and **1a~d** after intravenous injection.

**Table S7** Pharmacokinetic parameters of **S1** and **1a~d**. Parameters were calculated by PKSolver V2.0. The data are presented as mean  $\pm$  SD (n = 6).

| PK Parameters                          | S1                | 1a                 | 1b                 | 1c                 | 1d                 |
|----------------------------------------|-------------------|--------------------|--------------------|--------------------|--------------------|
| $T_{1/2}$ (h)                          | 1.97 $\pm$ 0.12   | 2.06 $\pm$ 0.15    | 1.79 $\pm$ 0.29    | 2.01 $\pm$ 0.15    | 1.79 $\pm$ 0.29    |
| $AUC_{0-inf}$ (μg•h•mL <sup>-1</sup> ) | 293.23 $\pm$ 8.54 | 307.20 $\pm$ 37.07 | 267.07 $\pm$ 25.80 | 374.11 $\pm$ 47.09 | 259.97 $\pm$ 20.71 |
| $MRT_{0-inf}$ (h)                      | 3.68 $\pm$ 0.08   | 3.62 $\pm$ 0.14    | 3.60 $\pm$ 0.03    | 3.59 $\pm$ 0.13    | 3.63 $\pm$ 0.06    |

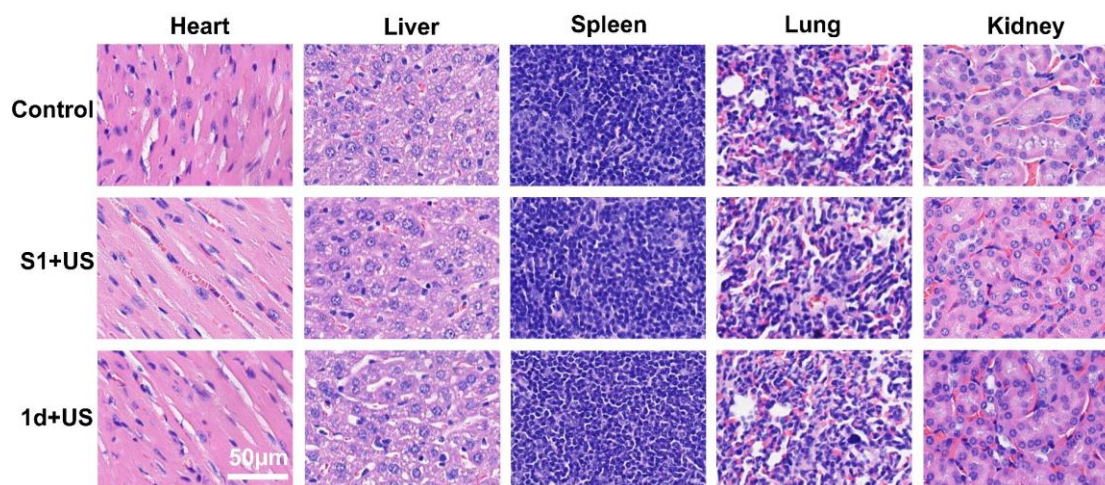

**Fig. S85.** H&E staining major organ tissues (heart, liver, spleen, lung, and kidney) of mice after 14 days of treatment.

## 5. References

- [1] C. D. Sheraw, T. N. Jackson, D. L. Eaton and J. E. Anthony, *Adv. Mater.*, 2003, **15**, 2009–2011.
- [2] M. J. Frisch; G. W. Trucks; H. B. Schlegel; G. E. Scuseria; M. A. Robb; J. R. Cheeseman; G. Scalmani; V. Barone; G. A. Petersson; H. Nakatsuji; X. Li; M. Caricato; A. Marenich; Bloino; J. B. Janesko; G. R. Gomperts; B. Mennucci; H. P. Hratchian; J. V. Ortiz; A. F. Izmaylov; J. L. Sonnenberg; D. Williams-Young; F. Ding; F. Lipparini; F. Egidi; J. Goings; B. Peng; A. Petrone; T. Henderson; D. Ranasinghe; V. G. Zakrzewski; J. Gao; N. Rega; G. Zheng; W. Liang; M. Hada; M. Ehara; K. Toyota; R. Fukuda; J. Hasegawa; M. Ishida; T. Nakajima; Y. Honda; O. Kitao; H. Nakai; T. Vreven; K. Throssell; J. A. Montgomery, Jr.; J. E. Peralta; F. Ogliaro; M. Bearpark; J. J. Heyd; E. K. Brothers; N. Kudin; V. N. Staroverov; T. Keith; R. Kobayashi; J. Normand; K. Raghavachari; A. Rendell; J. C. Burant; S. S. Iyengar; J. Tomasi; M. Cossi; J. M. Millam; M. Klene; C. Adamo; R. Cammi; J. W. Ochterski; R. L. Martin; K. Morokuma; O. Farkas; J. B. Foresman and D. J. Fox, Gaussian, Inc., Wallingford, CT, 2016.
